# Supplementary material
Source: publisher site journal article supplement (https://www.dovepress.com/article/251269)
Supplement: Supplementary file 1 [file get_supplementary_file.php]

## Supplementary Information

### Comprehensive analysis of SiNPs on the genome-wide transcriptional changes in *Caenorhabditis elegans*

Shuang Liang<sup>1,2,\*</sup>, Junchao Duan<sup>1,2,\*</sup>, Hejing Hu<sup>1,2</sup>, Jingyi Zhang<sup>1,2</sup>, Shan Gao<sup>2,3</sup>,  
Haiming Jing<sup>2,3</sup>, Guojun Li<sup>2,3</sup>, Zhiwei Sun<sup>1,2</sup>

<sup>1</sup> *Department of Toxicology and Sanitary Chemistry, School of Public Health, Capital Medical University, Beijing 100069, P.R. China*

<sup>2</sup> *Beijing Key Laboratory of Environmental Toxicology, Capital Medical University, Beijing 100069, P.R. China*

<sup>3</sup> *Beijing Key Laboratory of Diagnostic and Traceability Technologies for Food Poisoning, Beijing Center for Disease Prevention and Control/Beijing Center of Preventive Medicine Research, Beijing, 100013, P.R. China*

*\* These two authors contribute equally to this work.*

#### **Corresponding authors:**

**Zhiwei Sun**, School of Public Health, Capital Medical University, Beijing, 100069, P.R. China. E-mail: zwsun@ccmu.edu.cn

**Guojun Li**, Beijing Center for Disease Prevention and Control/Beijing Center of Preventive Medicine Research, Beijing, 100013, P.R. China. E-mail: ligj@bjcdc.org

## Supplemental Materials

### Characterization of SiNPs

The characterization of SiNPs has been reported in our previous studies [1]. SiNPs were dispersed in deionized water, and the size of 500 particles which selected randomly was measured using transmission electron microscopy (TEM) and Image J software. The zeta potential and hydrodynamic size of SiNPs were performed by dynamic light scattering (DLS) (Nano ZS90; Malvern Instruments, UK) in distilled water and K-medium. SiNPs appeared to be in spherical shape and well dispersed. The size distribution was measured using Image J software and the average diameter of SiNPs was  $58 \pm 7$  nm and a normal size distribution. The hydrodynamic size was  $117.90 \pm 1.15$  nm and zeta potential was  $-32.7 \pm 1.7$  mV in distilled water (Figure S1). The hydrodynamic size and Zeta potential of SiNPs in K-medium were  $104.29 \pm 0.69$  nm and  $-42.21 \pm 2.17$  mV, respectively. Our data suggested good monodispersity and stability of SiNPs.

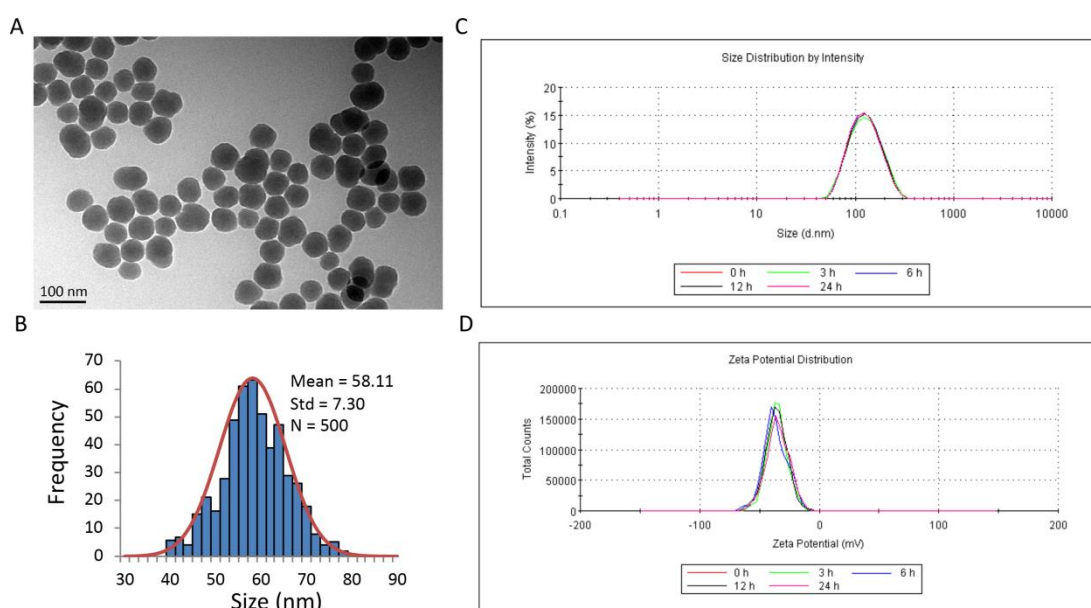

Figure S1. Characterization of SiNPs. A. TEM images showed the spherical and well-dispersed particles. B. Normal distribution diagram with a mean diameter of  $58 \pm 7$  nm. C. Size distribution by intensity. D. Zeta potential distribution. [1] Feng L, Yang X, Liang S, Xu Q, Miller MR, Duan J, et al. Silica nanoparticles trigger the vascular endothelial dysfunction and prethrombotic state via miR-451 directly regulating the IL6R signaling pathway. *Particle and fibre toxicology*. 2019;16:16.

### The uptake of SiNPs

Red fluorescence-labeled SiNPs treated for 2 h, and then observed nanoparticle uptake in *C. elegans* by the fluorescence microscopy (Nikon, AZ100, Japan). The fluorescence intensity of SiNPs was mainly distributed in the tail, intestinal tube, pharynx and head in the worm (Figure S2).

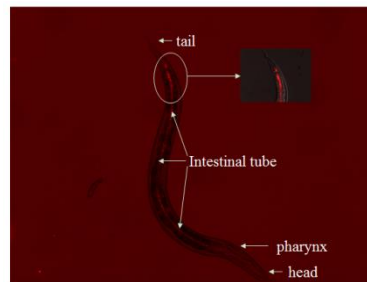

Figure S2. SiNPs uptake by *C. elegans* for 2h.

**Table S1. qRT-PCR primers.**

| <b>Gene Name</b> | <b>Forward primer</b>    | <b>Reverse primer</b>    |
|------------------|--------------------------|--------------------------|
| Tba-1            | TCAAACTGCCATCGCCGCC      | TCCAAGCGAGACCAGGCTTCAG   |
| Ins-7            | AGGTCCAGCAGAACCAGAAGAGTC | AAGTCGTCGGTGCATTCTTCACG  |
| Ist-1            | TCCTCCTCCTCCTCGTTAAGCAC  | TTCGCTAGATCCGCAGTCACAAC  |
| Daf-16           | CCGTGGATCGTGTGCTCAGAATC  | CAGGCAGTGGAGATGAGTTGGATG |
| Ftt-2            | ACTGTGTTTCGCCTTGGTCTTGC  | CACGGAGAAGCTGCATGATGAGG  |
| Fat-5            | GTCAGCCTTCATCGCCTTCTACAC | TGTGACCTCCTTCTCCGACTGC   |
| Rho-1            | CCAGACGTGTATGTGCCGACTG   | GAGAGTGGACGCAGACGATCATAG |

**Table S2. The up-regulated differentially expressed genes in nematodes.**

| Number | Gene Symbol | SiNPs-weight         | Control-weight       | Fold   | ANOVA    |
|--------|-------------|----------------------|----------------------|--------|----------|
|        |             | Avg signal<br>(log2) | Avg signal<br>(log2) | Change | p-value  |
| 1      | C50F7.5     | 10.26                | 4.87                 | 41.8   | 0.000425 |
| 2      | R08F11.7    | 7.9                  | 3.5                  | 21.14  | 0.000052 |
| 3      | ZK218.1     | 7.35                 | 3.26                 | 16.98  | 0.000107 |
| 4      | Y73B3A.1    | 8.94                 | 5.11                 | 14.17  | 0.005763 |
| 5      | ins-8       | 7.6                  | 3.93                 | 12.75  | 0.000118 |
| 6      | abu-6       | 7.3                  | 3.73                 | 11.84  | 0.015858 |
| 7      | clec-3      | 5.94                 | 2.47                 | 11.12  | 0.000317 |
| 8      | abu-7       | 8.85                 | 5.49                 | 10.26  | 0.008242 |
| 9      | cyp-35C1    | 6.21                 | 3.07                 | 8.81   | 0.004318 |
| 10     | Y51H7C.13   | 5.5                  | 2.41                 | 8.56   | 0.018101 |
| 11     | pqn-54      | 5.83                 | 2.78                 | 8.27   | 0.00509  |
| 12     | F14H12.3    | 7.63                 | 4.68                 | 7.69   | 0.00004  |
| 13     | pqn-57      | 6.02                 | 3.1                  | 7.56   | 0.003476 |
| 14     | sydn-1      | 7.13                 | 4.27                 | 7.28   | 0.008455 |
| 15     | H02F09.3    | 5.22                 | 2.54                 | 6.42   | 0.000564 |
| 16     | wip-1       | 9.14                 | 6.49                 | 6.31   | 0.011657 |
| 17     | Y39B6A.1    | 6.49                 | 3.84                 | 6.26   | 0.016543 |
| 18     | scl-14      | 6.88                 | 4.31                 | 5.97   | 0.00003  |
| 19     | K11D9.5     | 8.44                 | 5.87                 | 5.94   | 0.043899 |
| 20     | gpx-3       | 8.17                 | 5.61                 | 5.92   | 0.000062 |
| 21     | F55G11.4    | 6.67                 | 4.15                 | 5.73   | 0.001121 |
| 22     | W08E12.6    | 7.19                 | 4.71                 | 5.6    | 0.003197 |
| 23     | R07C12.1    | 7                    | 4.52                 | 5.59   | 0.003052 |
| 24     | C05C10.5    | 10.81                | 8.33                 | 5.59   | 0.027051 |
| 25     |             | 6.91                 | 4.44                 | 5.56   | 0.005578 |
| 26     | T28B11.11   | 6.21                 | 3.8                  | 5.3    | 0.034338 |
| 27     | set-9       | 8.21                 | 5.86                 | 5.11   | 0.005673 |
| 28     | T28B11.22   | 6.44                 | 4.11                 | 5.02   | 0.020221 |
| 29     | Y46H3A.5    | 6.56                 | 4.24                 | 5      | 0.005009 |
| 30     | sygl-1      | 8.08                 | 5.76                 | 4.99   | 0.015682 |
| 31     | larp-5      | 10.35                | 8.06                 | 4.89   | 0.012937 |

|    |           |       |      |      |          |
|----|-----------|-------|------|------|----------|
| 32 | T06C12.14 | 3.55  | 1.26 | 4.88 | 0.007872 |
| 33 | maph-1.2  | 7.65  | 5.38 | 4.83 | 0.005141 |
| 34 | F34D10.4  | 8.01  | 5.77 | 4.74 | 0.008896 |
| 35 | puf-6     | 8.18  | 5.95 | 4.71 | 0.025941 |
| 36 | T22F3.2   | 8.75  | 6.53 | 4.69 | 0.015267 |
| 37 | T06E4.12  | 3.54  | 1.32 | 4.66 | 0.014974 |
| 38 | tpx1-1    | 9.84  | 7.62 | 4.66 | 0.037191 |
| 39 | sir-2.3   | 5.17  | 2.98 | 4.59 | 0.000244 |
| 40 | mct-2     | 9.69  | 7.49 | 4.59 | 0.039341 |
| 41 | R11.2     | 6.59  | 4.41 | 4.52 | 0.000096 |
| 42 | F32D1.7   | 8.61  | 6.46 | 4.43 | 0.001364 |
| 43 | F10D7.5   | 8.93  | 6.79 | 4.42 | 0.002459 |
| 44 | sap-49    | 8.16  | 6.02 | 4.41 | 0.008106 |
| 45 | F55D12.5  | 9.98  | 7.86 | 4.35 | 0.020807 |
| 46 | col-161   | 5.1   | 3.01 | 4.25 | 0.003362 |
| 47 |           | 5.8   | 3.72 | 4.25 | 0.017931 |
| 48 | R03C1.1   | 7.05  | 4.97 | 4.22 | 0.004942 |
| 49 | pqn-76    | 4.63  | 2.55 | 4.22 | 0.009744 |
| 50 | Y54G2A.28 | 7.31  | 5.24 | 4.22 | 0.010887 |
| 51 | col-133   | 5.2   | 3.14 | 4.17 | 0.026663 |
| 52 | myo-2     | 9.36  | 7.3  | 4.16 | 0.023387 |
| 53 | C48A7.10  | 5.21  | 3.17 | 4.1  | 0.032828 |
| 54 | dpy-13    | 5.2   | 3.17 | 4.09 | 0.023148 |
| 55 | pqn-74    | 9.16  | 7.14 | 4.05 | 0.003747 |
| 56 | mex-1     | 10.04 | 8.03 | 4.01 | 0.011652 |
| 57 | nspe-6    | 6.88  | 4.9  | 3.96 | 0.002582 |
| 58 | par-2     | 8.44  | 6.45 | 3.96 | 0.009756 |
| 59 | rnp-8     | 9.75  | 7.79 | 3.89 | 0.011181 |
| 60 | Y48C3A.12 | 9.05  | 7.12 | 3.82 | 0.020596 |
| 61 | T28B11.4  | 6     | 4.07 | 3.8  | 0.008671 |
| 62 | cebp-1    | 8.05  | 6.14 | 3.77 | 0.011822 |
| 63 | F22H10.2  | 7.74  | 5.83 | 3.76 | 0.013555 |
| 64 | ZC21.3    | 6.8   | 4.9  | 3.72 | 0.00231  |
| 65 | Y46D2A.2  | 4.13  | 2.24 | 3.7  | 0.003931 |
| 66 | K08D10.10 | 6.46  | 4.59 | 3.67 | 0.003368 |

|     |            |       |       |      |          |
|-----|------------|-------|-------|------|----------|
| 67  | Y119C1B.12 | 4.1   | 2.23  | 3.65 | 0.000508 |
| 68  | myo-1      | 9.66  | 7.79  | 3.64 | 0.027007 |
| 69  | pqn-63     | 6.55  | 4.69  | 3.63 | 0.027866 |
| 70  | C14C6.5    | 10.6  | 8.75  | 3.62 | 0.000051 |
| 71  | apx-1      | 9.09  | 7.23  | 3.62 | 0.029965 |
| 72  | Y55B1AR.2  | 9     | 7.16  | 3.57 | 0.010942 |
| 73  | cdc-37     | 8.62  | 6.8   | 3.53 | 0.011862 |
| 74  | F59F4.2    | 11.74 | 9.93  | 3.5  | 0.007474 |
| 75  | F22G12.5   | 8.25  | 6.44  | 3.5  | 0.00804  |
| 76  | ZK355.2    | 8.01  | 6.21  | 3.49 | 0.011922 |
| 77  | ubxn-1     | 9.18  | 7.38  | 3.49 | 0.04659  |
| 78  | klp-7      | 8.27  | 6.47  | 3.48 | 0.024361 |
| 79  | ZC412.13   | 4.68  | 2.89  | 3.46 | 0.002445 |
| 80  | F54A3.6    | 7.1   | 5.32  | 3.42 | 0.027759 |
| 81  | abu-10     | 6.15  | 4.38  | 3.41 | 0.012094 |
| 82  | oac-54     | 4.1   | 2.33  | 3.4  | 0.006943 |
| 83  | piit-1     | 6.19  | 4.43  | 3.39 | 0.000239 |
| 84  | pqn-31     | 7.91  | 6.15  | 3.39 | 0.030878 |
| 85  | Y41E3.11   | 8.88  | 7.12  | 3.38 | 0.010091 |
| 86  | F01D5.5    | 7.88  | 6.12  | 3.37 | 0.000309 |
| 87  | dod-19     | 8.14  | 6.38  | 3.37 | 0.000618 |
| 88  | mys-2      | 8.15  | 6.4   | 3.36 | 0.011555 |
| 89  | zip-10     | 8.78  | 7.03  | 3.35 | 0.000528 |
| 90  | Y46H3C.5   | 6.17  | 4.43  | 3.35 | 0.01377  |
| 91  | daf-5      | 8.08  | 6.35  | 3.32 | 0.000891 |
| 92  | zyg-8      | 7.28  | 5.54  | 3.32 | 0.018194 |
| 93  | hmg-1.1    | 12.14 | 10.41 | 3.31 | 0.003036 |
| 94  | mab-10     | 6.75  | 5.03  | 3.31 | 0.024943 |
| 95  | cpg-1      | 11.63 | 9.9   | 3.3  | 0.001236 |
| 96  | ZC53.1     | 5.57  | 3.84  | 3.3  | 0.027784 |
| 97  | hpo-26     | 5.42  | 3.7   | 3.28 | 0.00171  |
| 98  | atx-2      | 9.61  | 7.89  | 3.28 | 0.003402 |
| 99  | hpo-38     | 6.1   | 4.39  | 3.28 | 0.032743 |
| 100 | Y54G2A.26  | 9.14  | 7.43  | 3.26 | 0.003626 |
| 101 | glna-1     | 6.58  | 4.88  | 3.26 | 0.039468 |

|     |           |       |       |      |          |
|-----|-----------|-------|-------|------|----------|
| 102 | sumv-2    | 9.12  | 7.42  | 3.23 | 0.023029 |
| 103 | F56D12.10 | 9.1   | 7.42  | 3.22 | 0.032426 |
| 104 | W04B5.3   | 7.44  | 5.76  | 3.21 | 0.017659 |
| 105 | mct-2     | 8.65  | 6.97  | 3.21 | 0.029228 |
| 106 | Y75B8A.3  | 5.36  | 3.7   | 3.17 | 0.010116 |
| 107 | attf-3    | 7.95  | 6.29  | 3.17 | 0.010246 |
| 108 | Y46D2A.2  | 6.95  | 5.29  | 3.15 | 0.01798  |
| 109 | pqn-82    | 7.45  | 5.79  | 3.15 | 0.021411 |
| 110 | tos-1     | 8.44  | 6.8   | 3.12 | 0.015602 |
| 111 | F41G4.7   | 4.36  | 2.72  | 3.12 | 0.04081  |
| 112 | C01G10.5  | 6.05  | 4.41  | 3.12 | 0.041136 |
| 113 | ZK596.1   | 7.92  | 6.28  | 3.11 | 0.003076 |
| 114 | F13H6.26  | 5.57  | 3.94  | 3.11 | 0.021171 |
| 115 | C18H9.6   | 7.27  | 5.64  | 3.1  | 0.001679 |
| 116 |           | 6.2   | 4.57  | 3.1  | 0.027423 |
| 117 | Y48B6A.18 | 5.99  | 4.36  | 3.09 | 0.009923 |
| 118 | C04A2.10  | 6.12  | 4.49  | 3.09 | 0.011266 |
| 119 |           | 6.53  | 4.91  | 3.07 | 0.024742 |
| 120 | tsn-1     | 9.84  | 8.23  | 3.06 | 0.005761 |
| 121 | sbp-1     | 7.44  | 5.83  | 3.06 | 0.015115 |
| 122 | F19B10.5  | 5.58  | 3.96  | 3.06 | 0.029269 |
| 123 | Y40B1A.3  | 6.29  | 4.68  | 3.05 | 0.014018 |
| 124 | str-163   | 4.59  | 3     | 3.02 | 0.001627 |
| 125 | K02A4.11  | 4.35  | 2.76  | 3.02 | 0.001973 |
| 126 | abu-4     | 5.52  | 3.93  | 3.02 | 0.013967 |
| 127 | ZK180.5   | 8.63  | 7.05  | 3    | 0.001498 |
| 128 | col-71    | 6.04  | 4.46  | 3    | 0.005935 |
| 129 | C53C9.2   | 10.29 | 8.71  | 3    | 0.026636 |
| 130 | R09F10.18 | 4.16  | 2.58  | 2.99 | 0.000866 |
| 131 | Y17G7B.17 | 9.28  | 7.7   | 2.98 | 0.015689 |
| 132 | F30B5.4   | 6.56  | 4.98  | 2.98 | 0.022303 |
| 133 | tfg-1     | 8.1   | 6.54  | 2.96 | 0.000162 |
| 134 | cbd-1     | 11.69 | 10.12 | 2.96 | 0.013381 |
| 135 | ddl-2     | 7.03  | 5.47  | 2.95 | 0.013044 |
| 136 | ZC15.1    | 4.51  | 2.96  | 2.93 | 0.000971 |



|     |           |       |       |      |          |
|-----|-----------|-------|-------|------|----------|
| 137 | ins-7     | 5.2   | 3.64  | 2.93 | 0.001604 |
| 138 | sea-2     | 8.16  | 6.61  | 2.93 | 0.002916 |
| 139 | F41G4.4   | 3.35  | 1.8   | 2.92 | 0.00973  |
| 140 | K08D10.14 | 6.99  | 5.45  | 2.91 | 0.012788 |
| 141 | wts-1     | 7.75  | 6.22  | 2.9  | 0.00462  |
| 142 | lat-2     | 5.83  | 4.29  | 2.9  | 0.014273 |
| 143 | cdk-12    | 9.65  | 8.12  | 2.9  | 0.037464 |
| 144 | F52G3.1   | 8.7   | 7.17  | 2.89 | 0.001272 |
| 145 | C08G5.7   | 5.74  | 4.21  | 2.89 | 0.004621 |
| 146 | C49G7.10  | 6.32  | 4.79  | 2.88 | 0.001553 |
| 147 | F43C11.14 | 7.18  | 5.65  | 2.88 | 0.025749 |
| 148 | ZC266.1   | 6.73  | 5.2   | 2.88 | 0.026398 |
| 149 | npp-8     | 8.94  | 7.42  | 2.87 | 0.005363 |
| 150 | sam-10    | 8.67  | 7.16  | 2.86 | 0.005232 |
| 151 | srpa-72   | 9.06  | 7.54  | 2.86 | 0.016653 |
| 152 | B0403.3   | 6.62  | 5.1   | 2.86 | 0.02637  |
| 153 | R07B1.9   | 6.42  | 4.9   | 2.86 | 0.035786 |
| 154 | R02F2.1   | 10.29 | 8.77  | 2.85 | 0.021201 |
| 155 | Y47D3B.6  | 6.17  | 4.67  | 2.84 | 0.027041 |
| 156 | mex-5     | 11.61 | 10.11 | 2.84 | 0.046419 |
| 157 | parp-1    | 8.8   | 7.3   | 2.83 | 0.049317 |
| 158 | C54D2.1   | 5.7   | 4.2   | 2.82 | 0.0104   |
| 159 | siah-1    | 11.1  | 9.61  | 2.81 | 0.013298 |
| 160 | set-26    | 8.28  | 6.79  | 2.8  | 0.022421 |
| 161 | Y9D1A.1   | 5.62  | 4.14  | 2.8  | 0.039282 |
| 162 | dod-17    | 5.75  | 4.27  | 2.79 | 0.000815 |
| 163 | abt-2     | 6.39  | 4.91  | 2.79 | 0.02289  |
| 164 | dbn-1     | 9.31  | 7.84  | 2.78 | 0.006545 |
| 165 | K11H12.4  | 6.41  | 4.94  | 2.77 | 0.001477 |
| 166 | npp-4     | 9.23  | 7.76  | 2.77 | 0.025201 |
| 167 | ztf-22    | 7.81  | 6.34  | 2.76 | 0.006409 |
| 168 | C38C3.3   | 3.79  | 2.32  | 2.76 | 0.033431 |
| 169 | rle-1     | 7.95  | 6.48  | 2.75 | 0.002984 |
| 170 | ZK1010.5  | 4.62  | 3.16  | 2.74 | 0.004545 |
| 171 | ing-3     | 8.14  | 6.69  | 2.74 | 0.014924 |

|     |            |       |      |      |          |
|-----|------------|-------|------|------|----------|
| 172 | Y48G8AL.10 | 7.54  | 6.08 | 2.74 | 0.031934 |
| 173 | F35E8.10   | 8.78  | 7.33 | 2.73 | 0.000486 |
| 174 |            | 9.06  | 7.62 | 2.73 | 0.027739 |
| 175 | nspb-7     | 4.41  | 2.96 | 2.72 | 0.000988 |
| 176 | pgp-1      | 5.21  | 3.76 | 2.72 | 0.010667 |
| 177 | snx-14     | 7.84  | 6.4  | 2.72 | 0.010855 |
| 178 | pha-4      | 8.27  | 6.84 | 2.71 | 0.002082 |
| 179 | pqn-36     | 6.89  | 5.45 | 2.71 | 0.004819 |
| 180 | lin-41     | 9.92  | 8.48 | 2.71 | 0.009575 |
| 181 | Y53F4B.9   | 7.39  | 5.95 | 2.71 | 0.018899 |
| 182 | F32A11.3   | 5.7   | 4.27 | 2.7  | 0.003319 |
| 183 | xpo-2      | 8.92  | 7.49 | 2.7  | 0.048901 |
| 184 | T28B11.17  | 6.07  | 4.65 | 2.69 | 0.005836 |
| 185 | spat-2     | 9.6   | 8.18 | 2.69 | 0.011232 |
| 186 | M03A1.12   | 4.72  | 3.3  | 2.68 | 0.006409 |
| 187 | T05C7.3    | 5.85  | 4.43 | 2.68 | 0.017181 |
| 188 | F11G11.5   | 9.51  | 8.09 | 2.68 | 0.040697 |
| 189 | K06A9.1    | 6.79  | 5.37 | 2.67 | 0.000217 |
| 190 | K08A2.1    | 7.16  | 5.74 | 2.67 | 0.000223 |
| 191 | Y59C2A.2   | 7.9   | 6.48 | 2.67 | 0.006259 |
| 192 | Y51H7C.15  | 7.31  | 5.89 | 2.67 | 0.026833 |
| 193 | F31E8.21   | 5.38  | 3.96 | 2.67 | 0.040879 |
| 194 | Y49G5B.6   | 3.66  | 2.25 | 2.66 | 0.00171  |
| 195 | F41E6.11   | 4.61  | 3.2  | 2.66 | 0.002448 |
| 196 | T22B11.3   | 5.28  | 3.87 | 2.66 | 0.01244  |
| 197 | Y50D7A.8   | 8.1   | 6.69 | 2.66 | 0.01853  |
| 198 | irg-2      | 5.2   | 3.79 | 2.65 | 0.000299 |
| 199 | C34H4.2    | 7.31  | 5.91 | 2.65 | 0.01196  |
| 200 | rsr-1      | 7.62  | 6.22 | 2.64 | 0.001532 |
| 201 | pod-1      | 9.51  | 8.11 | 2.64 | 0.003708 |
| 202 | grd-6      | 5.71  | 4.31 | 2.64 | 0.021738 |
| 203 | T24B8.4    | 8.37  | 6.98 | 2.63 | 0.001615 |
| 204 | pqn-20     | 10.45 | 9.05 | 2.63 | 0.013919 |
| 205 | Y67H2A.10  | 8.92  | 7.53 | 2.63 | 0.040378 |
| 206 | hsp-17     | 4.17  | 2.78 | 2.61 | 0.001354 |

|     |            |       |      |      |          |
|-----|------------|-------|------|------|----------|
| 207 | F35E8.19   | 6.09  | 4.71 | 2.6  | 0.000057 |
| 208 | F26F2.7    | 8.58  | 7.2  | 2.6  | 0.018103 |
| 209 | nhr-7      | 6.95  | 5.57 | 2.6  | 0.023695 |
| 210 | Y47D7A.13  | 6.58  | 5.21 | 2.59 | 0.001795 |
| 211 | tra-1      | 8.7   | 7.33 | 2.59 | 0.006876 |
| 212 | Y57A10A.31 | 9.36  | 7.99 | 2.59 | 0.00968  |
| 213 | ergo-1     | 9.72  | 8.35 | 2.59 | 0.024027 |
| 214 | rog-1      | 9.55  | 8.17 | 2.59 | 0.02443  |
| 215 | M151.7     | 6.17  | 4.81 | 2.58 | 0.015636 |
| 216 | Y42H9AR.1  | 7.94  | 6.58 | 2.58 | 0.018993 |
| 217 | col-135    | 6.05  | 4.69 | 2.57 | 0.002321 |
| 218 | F17C11.1   | 9.6   | 8.24 | 2.57 | 0.016679 |
| 219 | abu-8      | 4.17  | 2.82 | 2.56 | 0.015604 |
| 220 |            | 4.11  | 2.75 | 2.56 | 0.0325   |
| 221 | pgp-14     | 5.8   | 4.44 | 2.56 | 0.033226 |
| 222 | ZC239.22   | 5.84  | 4.49 | 2.55 | 0.000253 |
| 223 | pqn-75     | 5.51  | 4.16 | 2.55 | 0.000481 |
| 224 | phat-3     | 4.06  | 2.71 | 2.55 | 0.003773 |
| 225 | H11E01.3   | 7.06  | 5.71 | 2.55 | 0.006089 |
| 226 | dhhc-7     | 8.5   | 7.15 | 2.55 | 0.009581 |
| 227 | F19B2.5    | 8.48  | 7.13 | 2.55 | 0.023844 |
| 228 | tcc-1      | 9.85  | 8.49 | 2.55 | 0.028287 |
| 229 | C09F12.2   | 4.9   | 3.56 | 2.55 | 0.030704 |
| 230 | dot-1.1    | 8.78  | 7.44 | 2.54 | 0.005209 |
| 231 | R03G8.6    | 4.2   | 2.86 | 2.54 | 0.005511 |
| 232 | F01G4.4    | 8.67  | 7.32 | 2.54 | 0.014432 |
| 233 | Y71F9AL.9  | 11.14 | 9.8  | 2.54 | 0.015941 |
| 234 | pqn-39     | 7.83  | 6.49 | 2.54 | 0.017961 |
| 235 | rol-1      | 5.61  | 4.27 | 2.54 | 0.027406 |
| 236 | C41H7.5    | 4.56  | 3.22 | 2.54 | 0.040832 |
| 237 | unc-34     | 8.96  | 7.62 | 2.53 | 0.000334 |
| 238 | R04E5.8    | 6.66  | 5.32 | 2.53 | 0.004292 |
| 239 | Y39E4A.3   | 7.21  | 5.87 | 2.53 | 0.011885 |
| 240 | Y94H6A.10  | 5.98  | 4.64 | 2.52 | 0.000342 |
| 241 | pcp-4      | 5.5   | 4.17 | 2.52 | 0.018165 |

|     |           |       |      |      |          |
|-----|-----------|-------|------|------|----------|
| 242 | Y49G5B.2  | 3     | 1.67 | 2.51 | 0.000686 |
| 243 | rga-4     | 9.45  | 8.12 | 2.51 | 0.010405 |
| 244 | msi-1     | 9.89  | 8.56 | 2.51 | 0.016195 |
| 245 | cut-4     | 4.26  | 2.93 | 2.51 | 0.041275 |
| 246 | ZK809.1   | 2.72  | 1.4  | 2.51 | 0.046412 |
| 247 | W05B5.1   | 8.59  | 7.26 | 2.5  | 0.000217 |
| 248 | R07C12.2  | 7.36  | 6.03 | 2.5  | 0.013892 |
| 249 | ncx-8     | 3.22  | 1.91 | 2.49 | 0.002704 |
| 250 | lag-2     | 4.34  | 3.02 | 2.49 | 0.016655 |
| 251 | mvk-1     | 9.48  | 8.16 | 2.49 | 0.022664 |
| 252 | ZK121.2   | 6.98  | 5.66 | 2.49 | 0.03805  |
| 253 | M60.9     | 4     | 2.68 | 2.48 | 0.00204  |
| 254 | Y37H9A.3  | 6.6   | 5.29 | 2.48 | 0.004454 |
| 255 | wwp-1     | 10.36 | 9.05 | 2.48 | 0.008762 |
| 256 | unc-94    | 10.04 | 8.74 | 2.47 | 0.040872 |
| 257 | F09C8.2   | 8.62  | 7.32 | 2.46 | 0.001597 |
| 258 | adm-2     | 7.3   | 6.01 | 2.46 | 0.007019 |
| 259 | Y56A3A.6  | 6.82  | 5.52 | 2.46 | 0.013865 |
| 260 | igeg-2    | 6.42  | 5.13 | 2.45 | 0.001465 |
| 261 | ZC266.1   | 4.36  | 3.06 | 2.45 | 0.006569 |
| 262 | Y39F10B.1 | 9.36  | 8.06 | 2.45 | 0.009051 |
| 263 | patr-1    | 10.53 | 9.23 | 2.45 | 0.019347 |
| 264 | Y53F4B.21 | 7.57  | 6.27 | 2.45 | 0.026671 |
| 265 | H18N23.2  | 7.62  | 6.32 | 2.45 | 0.030998 |
| 266 | F31A3.5   | 6.13  | 4.85 | 2.44 | 0.000085 |
| 267 | C01F1.6   | 7.99  | 6.7  | 2.44 | 0.005227 |
| 268 | pqn-94    | 10.22 | 8.93 | 2.44 | 0.013876 |
| 269 | col-144   | 7.96  | 6.68 | 2.44 | 0.048635 |
| 270 | nhr-27    | 8.38  | 7.1  | 2.43 | 0.033143 |
| 271 | R166.6    | 10.56 | 9.28 | 2.42 | 0.004473 |
| 272 | ZC15.3    | 3.78  | 2.5  | 2.42 | 0.014196 |
| 273 | D1037.1   | 6.92  | 5.64 | 2.42 | 0.024057 |
| 274 | F43C1.7   | 4.25  | 2.98 | 2.41 | 0.004672 |
| 275 | Y49F6B.8  | 3.3   | 2.03 | 2.41 | 0.004979 |
| 276 | abu-11    | 7.52  | 6.25 | 2.41 | 0.010932 |

|     |           |       |      |      |          |
|-----|-----------|-------|------|------|----------|
| 277 | Y37D8A.17 | 7.94  | 6.68 | 2.41 | 0.015314 |
| 278 | sgt-1     | 9.39  | 8.12 | 2.41 | 0.029359 |
| 279 | hda-10    | 6.3   | 5.04 | 2.41 | 0.041895 |
| 280 | gpb-1     | 10.36 | 9.1  | 2.4  | 0.000358 |
| 281 | srap-1    | 9.51  | 8.25 | 2.4  | 0.002171 |
| 282 | C30F2.3   | 5.59  | 4.32 | 2.4  | 0.02502  |
| 283 | cyk-4     | 9.99  | 8.73 | 2.4  | 0.027431 |
| 284 | T20B5.2   | 7.11  | 5.85 | 2.4  | 0.030322 |
| 285 | mbtr-1    | 8.03  | 6.77 | 2.4  | 0.034358 |
| 286 | natc-1    | 9.56  | 8.29 | 2.4  | 0.03565  |
| 287 | T22B7.3   | 7.52  | 6.26 | 2.39 | 0.00014  |
| 288 | uggt-2    | 3.75  | 2.49 | 2.39 | 0.002002 |
| 289 | pqn-72    | 6.23  | 4.98 | 2.39 | 0.009626 |
| 290 | Y79H2A.3  | 7.73  | 6.48 | 2.38 | 0.01131  |
| 291 | C25F9.16  | 5.39  | 4.14 | 2.38 | 0.017835 |
| 292 | ceh-92    | 8.15  | 6.9  | 2.38 | 0.042043 |
| 293 | mcm-7     | 9.92  | 8.67 | 2.38 | 0.042495 |
| 294 | Y66A7AL.1 | 3.2   | 1.95 | 2.37 | 0.001104 |
| 295 | T28B11.13 | 4.76  | 3.51 | 2.37 | 0.010484 |
| 296 | Y48G1C.8  | 8.55  | 7.31 | 2.37 | 0.022202 |
| 297 | unc-11    | 9.12  | 7.87 | 2.37 | 0.023387 |
| 298 | egl-3     | 10.23 | 8.99 | 2.37 | 0.034006 |
| 299 | nhr-119   | 7.15  | 5.91 | 2.36 | 0.005218 |
| 300 | srr-2     | 3.12  | 1.88 | 2.36 | 0.028064 |
| 301 | F36D3.16  | 2.87  | 1.64 | 2.35 | 0.000222 |
| 302 | F37H8.3   | 5.18  | 3.95 | 2.35 | 0.002091 |
| 303 | C05E4.12  | 5.71  | 4.48 | 2.35 | 0.009291 |
| 304 | F55G11.2  | 3.78  | 2.55 | 2.35 | 0.012856 |
| 305 | F15D4.4   | 5.02  | 3.79 | 2.35 | 0.031582 |
| 306 | Y57G11C.9 | 9.05  | 7.82 | 2.34 | 0.000128 |
| 307 | klf-1     | 7.82  | 6.6  | 2.34 | 0.003761 |
| 308 | C15C6.3   | 7.61  | 6.39 | 2.34 | 0.008795 |
| 309 | Y113G7C.1 | 4.03  | 2.8  | 2.34 | 0.014473 |
| 310 | C39D10.7  | 10.12 | 8.89 | 2.34 | 0.022795 |
| 311 | abt-4     | 6.43  | 5.2  | 2.34 | 0.02653  |

|     |          |       |       |      |          |
|-----|----------|-------|-------|------|----------|
| 312 | unc-51   | 8.87  | 7.65  | 2.33 | 0.000312 |
| 313 | F25A2.1  | 3.34  | 2.12  | 2.33 | 0.004511 |
| 314 | tnt-4    | 7.86  | 6.64  | 2.33 | 0.012914 |
| 315 | gld-1    | 11.43 | 10.21 | 2.33 | 0.031129 |
| 316 | hsp-16.2 | 3.06  | 1.85  | 2.32 | 0.006757 |
| 317 | sec-23   | 8.55  | 7.34  | 2.32 | 0.008796 |
| 318 | kin-19   | 11.47 | 10.25 | 2.32 | 0.022707 |
| 319 | wnk-1    | 10.1  | 8.88  | 2.32 | 0.023673 |
| 320 |          | 4.54  | 3.32  | 2.32 | 0.026931 |
| 321 | F26H9.2  | 8.4   | 7.18  | 2.32 | 0.039807 |
| 322 |          | 8.16  | 6.95  | 2.31 | 0.005761 |
| 323 |          | 5.11  | 3.9   | 2.31 | 0.01658  |
| 324 | col-125  | 10.31 | 9.1   | 2.31 | 0.017573 |
| 325 | max-2    | 9.8   | 8.59  | 2.31 | 0.025318 |
| 326 | cgp-1    | 9.98  | 8.77  | 2.31 | 0.032035 |
| 327 | R148.3   | 8.33  | 7.13  | 2.3  | 0.003031 |
| 328 | asns-1   | 6.58  | 5.38  | 2.3  | 0.013538 |
| 329 | Y59C2A.3 | 6.93  | 5.73  | 2.3  | 0.017242 |
| 330 | C50F2.2  | 6.62  | 5.41  | 2.3  | 0.017719 |
| 331 | mtm-9    | 7.6   | 6.4   | 2.3  | 0.040794 |
| 332 | T26A8.4  | 8.68  | 7.48  | 2.3  | 0.042216 |
| 333 | T28D9.9  | 4.31  | 3.11  | 2.29 | 0.010899 |
| 334 | ram-2    | 8.45  | 7.26  | 2.29 | 0.01767  |
| 335 | epn-1    | 10.98 | 9.79  | 2.29 | 0.020705 |
| 336 | arid-1   | 8.13  | 6.94  | 2.28 | 0.002748 |
| 337 | lec-3    | 7.84  | 6.66  | 2.28 | 0.008795 |
| 338 | C12D12.1 | 7.28  | 6.09  | 2.28 | 0.011527 |
| 339 | R12A1.3  | 7.57  | 6.38  | 2.28 | 0.011566 |
| 340 | T06E4.8  | 4.25  | 3.07  | 2.28 | 0.02846  |
| 341 | col-166  | 4.24  | 3.05  | 2.28 | 0.030893 |
| 342 | sid-3    | 7.36  | 6.17  | 2.27 | 0.002561 |
| 343 | K11D2.4  | 8.64  | 7.46  | 2.27 | 0.01093  |
| 344 | T24C4.4  | 6.43  | 5.26  | 2.26 | 0.001408 |
| 345 | bath-40  | 9.72  | 8.54  | 2.26 | 0.017486 |
| 346 | swns-1   | 8.96  | 7.79  | 2.25 | 0.00009  |

|     |            |       |       |      |          |
|-----|------------|-------|-------|------|----------|
| 347 | Y20F4.4    | 7.66  | 6.49  | 2.25 | 0.002627 |
| 348 | abts-4     | 8.1   | 6.94  | 2.25 | 0.00932  |
| 349 |            | 2.61  | 1.44  | 2.25 | 0.012433 |
| 350 | W09G3.6    | 8.22  | 7.05  | 2.25 | 0.023764 |
| 351 | ins-11     | 4.28  | 3.11  | 2.25 | 0.029106 |
| 352 | col-169    | 4.29  | 3.13  | 2.24 | 0.012567 |
| 353 | ztf-2      | 5.65  | 4.48  | 2.24 | 0.0225   |
| 354 | puf-3      | 10.34 | 9.18  | 2.24 | 0.029541 |
| 355 | F55B11.5   | 3.26  | 2.09  | 2.24 | 0.037325 |
| 356 | Y55D5A.4   | 4.96  | 3.8   | 2.23 | 0.003466 |
| 357 | F47B3.4    | 4.89  | 3.73  | 2.23 | 0.003607 |
| 358 | cnp-2      | 6.15  | 5     | 2.23 | 0.00472  |
| 359 | nhr-88     | 8.73  | 7.57  | 2.23 | 0.019844 |
| 360 | puf-7      | 6.81  | 5.65  | 2.23 | 0.023987 |
| 361 | kreg-1     | 4.84  | 3.68  | 2.23 | 0.035716 |
| 362 | gfat-1     | 9.06  | 7.9   | 2.23 | 0.042832 |
| 363 | pde-3      | 6.12  | 4.97  | 2.22 | 0.000608 |
| 364 | F09F7.5    | 8.47  | 7.32  | 2.22 | 0.020525 |
| 365 | cit-1.2    | 8.26  | 7.12  | 2.22 | 0.035012 |
| 366 | C05D12.7   | 6.89  | 5.75  | 2.21 | 0.002943 |
| 367 | ppk-2      | 8.57  | 7.42  | 2.21 | 0.003671 |
| 368 | Y75B8A.8   | 8.07  | 6.93  | 2.21 | 0.006458 |
| 369 | Y57G11C.51 | 5.21  | 4.07  | 2.21 | 0.012931 |
| 370 | maph-1.3   | 8.17  | 7.02  | 2.21 | 0.01666  |
| 371 | tyr-2      | 7.51  | 6.36  | 2.21 | 0.023931 |
| 372 | Y54G2A.27  | 4.67  | 3.53  | 2.21 | 0.038006 |
| 373 | sup-26     | 9.95  | 8.81  | 2.2  | 0.00043  |
| 374 | denn-4     | 8.07  | 6.93  | 2.2  | 0.00643  |
| 375 | myo-5      | 8.34  | 7.21  | 2.2  | 0.00673  |
| 376 | mcm-2      | 9.21  | 8.07  | 2.2  | 0.011345 |
| 377 | K05F1.9    | 5.85  | 4.71  | 2.2  | 0.01345  |
| 378 | mcm-4      | 9.46  | 8.33  | 2.2  | 0.037473 |
| 379 | T15D6.8    | 4.76  | 3.62  | 2.2  | 0.038646 |
| 380 | cdr-4      | 5.19  | 4.06  | 2.2  | 0.041575 |
| 381 | perm-4     | 11.83 | 10.69 | 2.2  | 0.042272 |

|     |            |       |       |      |          |
|-----|------------|-------|-------|------|----------|
| 382 | daz-1      | 10.55 | 9.41  | 2.2  | 0.043339 |
| 383 | C06G1.6    | 7.31  | 6.18  | 2.19 | 0.000535 |
| 384 | copb-1     | 9.23  | 8.1   | 2.19 | 0.002145 |
| 385 | Y106G6A.8  | 3.98  | 2.85  | 2.19 | 0.003442 |
| 386 | K09D9.1    | 4.85  | 3.72  | 2.19 | 0.022473 |
| 387 | Y92H12BM.1 | 7.89  | 6.76  | 2.19 | 0.043904 |
| 388 | rom-4      | 8     | 6.87  | 2.19 | 0.046612 |
| 389 | C31H5.8    | 2.79  | 1.66  | 2.18 | 0.001824 |
| 390 | C03A7.12   | 4.8   | 3.67  | 2.18 | 0.003526 |
| 391 | Y50D4B.1   | 7.16  | 6.04  | 2.18 | 0.012395 |
| 392 | F38E9.1    | 8.37  | 7.24  | 2.18 | 0.038425 |
| 393 | unc-62     | 8.92  | 7.81  | 2.17 | 0.000394 |
| 394 | M01G12.14  | 4.96  | 3.84  | 2.17 | 0.001543 |
| 395 | shn-1      | 7.84  | 6.72  | 2.17 | 0.003706 |
| 396 | ZK84.1     | 6.95  | 5.83  | 2.17 | 0.004677 |
| 397 | T06E4.14   | 3.53  | 2.41  | 2.17 | 0.005606 |
| 398 | lmd-5      | 3.51  | 2.4   | 2.17 | 0.028229 |
| 399 | Y116A8C.13 | 5.71  | 4.59  | 2.17 | 0.039255 |
| 400 | Y49E10.10  | 4.97  | 3.86  | 2.16 | 0.000734 |
| 401 | ketn-1     | 6.96  | 5.85  | 2.16 | 0.003515 |
| 402 | rsa-2      | 7.43  | 6.32  | 2.16 | 0.004356 |
| 403 | Y32B12A.5  | 3.3   | 2.19  | 2.16 | 0.019621 |
| 404 | taf-3      | 7.64  | 6.53  | 2.16 | 0.031318 |
| 405 | cah-6      | 6.46  | 5.35  | 2.16 | 0.04558  |
| 406 | F29G9.1    | 5.22  | 4.12  | 2.15 | 0.003372 |
| 407 | T23B5.3    | 9.05  | 7.94  | 2.15 | 0.010183 |
| 408 | F17E9.5    | 4.53  | 3.43  | 2.15 | 0.01378  |
| 409 | cmd-1      | 11.25 | 10.14 | 2.15 | 0.033299 |
| 410 | pqn-59     | 11.79 | 10.69 | 2.15 | 0.045649 |
| 411 | ZK470.2    | 7.55  | 6.46  | 2.14 | 0.002065 |
| 412 | F53F1.4    | 7.66  | 6.57  | 2.14 | 0.002191 |
| 413 | rab-7      | 11.64 | 10.54 | 2.14 | 0.004495 |
| 414 | jip-1      | 5.65  | 4.55  | 2.14 | 0.010004 |
| 415 | Y9D1A.2    | 7.8   | 6.71  | 2.14 | 0.01001  |
| 416 | ida-1      | 9.03  | 7.93  | 2.14 | 0.01047  |



|     |           |       |      |      |          |
|-----|-----------|-------|------|------|----------|
| 417 |           | 10.1  | 9    | 2.14 | 0.014465 |
| 418 | col-117   | 10.1  | 9    | 2.14 | 0.014465 |
| 419 | vhp-1     | 9     | 7.91 | 2.14 | 0.014764 |
| 420 | pqn-41    | 7.78  | 6.69 | 2.14 | 0.015985 |
| 421 | R12B2.12  | 4.28  | 3.19 | 2.14 | 0.018965 |
| 422 | C11G10.2  | 4.87  | 3.77 | 2.14 | 0.027996 |
| 423 | oig-6     | 8.47  | 7.37 | 2.14 | 0.039465 |
| 424 | F31C3.3   | 8.24  | 7.15 | 2.13 | 0.006604 |
| 425 | cyp-33A1  | 5.83  | 4.74 | 2.13 | 0.012163 |
| 426 | F41H10.3  | 9.36  | 8.27 | 2.13 | 0.025094 |
| 427 | taf-2     | 7.17  | 6.09 | 2.13 | 0.030243 |
| 428 | gbf-1     | 8.25  | 7.17 | 2.12 | 0.003222 |
| 429 | Y50D7A.1  | 6.96  | 5.88 | 2.12 | 0.003677 |
| 430 | H43E16.1  | 6.27  | 5.18 | 2.12 | 0.005163 |
| 431 | Y43F8B.17 | 3.12  | 2.03 | 2.12 | 0.008597 |
| 432 | ceh-39    | 7.9   | 6.82 | 2.12 | 0.013908 |
| 433 | ttr-26    | 6.75  | 5.66 | 2.12 | 0.01548  |
| 434 | F29G9.14  | 3.72  | 2.64 | 2.12 | 0.015492 |
| 435 | Y111B2A.9 | 8.2   | 7.11 | 2.12 | 0.017748 |
| 436 | cyb-1     | 10.13 | 9.05 | 2.12 | 0.022424 |
| 437 | F35B3.7   | 7.6   | 6.51 | 2.12 | 0.024868 |
| 438 | smgl-2    | 6.69  | 5.61 | 2.12 | 0.045757 |
| 439 | fipp-1    | 7.98  | 6.9  | 2.12 | 0.04988  |
| 440 | C42D4.3   | 6.93  | 5.86 | 2.11 | 0.002413 |
| 441 | ntl-3     | 9.07  | 7.99 | 2.11 | 0.014271 |
| 442 | T22F3.3   | 10.26 | 9.18 | 2.11 | 0.01792  |
| 443 | W05H7.1   | 6.61  | 5.53 | 2.11 | 0.036731 |
| 444 | let-805   | 8.82  | 7.75 | 2.1  | 0.000188 |
| 445 | tub-2     | 8.1   | 7.03 | 2.1  | 0.002335 |
| 446 | pis-1     | 8.23  | 7.16 | 2.1  | 0.005924 |
| 447 | col-145   | 6.27  | 5.2  | 2.1  | 0.021119 |
| 448 | rimb-1    | 7.28  | 6.2  | 2.1  | 0.022637 |
| 449 | scrm-1    | 7.17  | 6.1  | 2.1  | 0.025168 |
| 450 | F59B10.3  | 7.38  | 6.31 | 2.1  | 0.032964 |
| 451 | K10C3.10  | 4.31  | 3.25 | 2.09 | 0.001906 |

|     |           |       |       |      |          |
|-----|-----------|-------|-------|------|----------|
| 452 | jmjd-2    | 8.29  | 7.23  | 2.09 | 0.005045 |
| 453 | Y54E2A.4  | 7.55  | 6.49  | 2.09 | 0.007459 |
| 454 | pqn-87    | 10.09 | 9.03  | 2.09 | 0.009365 |
| 455 | pry-1     | 6.84  | 5.77  | 2.09 | 0.016555 |
| 456 | acs-13    | 10.27 | 9.2   | 2.09 | 0.020961 |
| 457 | tkl-1     | 8.92  | 7.86  | 2.09 | 0.022431 |
| 458 | col-17    | 3.3   | 2.23  | 2.09 | 0.028488 |
| 459 | C08F8.6   | 4.69  | 3.63  | 2.09 | 0.030806 |
| 460 | rde-10    | 7.41  | 6.35  | 2.09 | 0.032878 |
| 461 | atm-1     | 7.47  | 6.4   | 2.09 | 0.038507 |
| 462 | Y106G6G.4 | 6.45  | 5.39  | 2.09 | 0.041938 |
| 463 | F38A6.6   | 4.72  | 3.65  | 2.09 | 0.04629  |
| 464 | C15C7.4   | 5.45  | 4.39  | 2.08 | 0.000715 |
| 465 | clcc-71   | 3.75  | 2.69  | 2.08 | 0.003524 |
| 466 | spat-3    | 8.27  | 7.21  | 2.08 | 0.007226 |
| 467 | thn-1     | 5.65  | 4.6   | 2.08 | 0.007386 |
| 468 | F13A7.1   | 3.93  | 2.87  | 2.08 | 0.009257 |
| 469 | nipa-1    | 8.76  | 7.71  | 2.08 | 0.020299 |
| 470 | fbxa-30   | 3.16  | 2.1   | 2.08 | 0.024973 |
| 471 | T10B5.10  | 4.92  | 3.86  | 2.08 | 0.032367 |
| 472 | C02B10.5  | 8.87  | 7.82  | 2.08 | 0.035618 |
| 473 | hil-4     | 8.38  | 7.33  | 2.08 | 0.04566  |
| 474 | F37A8.5   | 10.28 | 9.23  | 2.07 | 0.000442 |
| 475 | cht-1     | 8.16  | 7.11  | 2.07 | 0.004126 |
| 476 | nos-3     | 9.7   | 8.65  | 2.07 | 0.008875 |
| 477 | sca-1     | 11.26 | 10.21 | 2.07 | 0.010617 |
| 478 | T10B10.3  | 7.31  | 6.26  | 2.07 | 0.015616 |
| 479 | par-3     | 8.75  | 7.7   | 2.07 | 0.019204 |
| 480 | F53C11.5  | 9.16  | 8.11  | 2.07 | 0.019459 |
| 481 | C18H9.3   | 9.44  | 8.39  | 2.07 | 0.030979 |
| 482 | enu-3.2   | 8.96  | 7.91  | 2.07 | 0.038529 |
| 483 | ser-4     | 5.4   | 4.35  | 2.07 | 0.040452 |
| 484 | cdh-12    | 4.75  | 3.71  | 2.06 | 0.000214 |
| 485 | cpn-4     | 8.57  | 7.52  | 2.06 | 0.001808 |
| 486 | K10F12.8  | 5.44  | 4.4   | 2.06 | 0.003269 |

|            |            |       |      |      |          |
|------------|------------|-------|------|------|----------|
| <b>487</b> | T05B11.13  | 4.92  | 3.88 | 2.06 | 0.006325 |
| <b>488</b> | yap-1      | 9.63  | 8.58 | 2.06 | 0.007322 |
| <b>489</b> | rbc-2      | 8.49  | 7.45 | 2.06 | 0.009962 |
| <b>490</b> | T21H8.5    | 7.48  | 6.44 | 2.06 | 0.024307 |
| <b>491</b> | Y48G8AL.16 | 3.9   | 2.86 | 2.06 | 0.024599 |
| <b>492</b> | plin-1     | 10.54 | 9.5  | 2.06 | 0.0437   |
| <b>493</b> | Y43F8B.3   | 5.92  | 4.88 | 2.05 | 0.002539 |
| <b>494</b> | gsto-3     | 8.68  | 7.64 | 2.05 | 0.00865  |
| <b>495</b> | unc-69     | 6.69  | 5.66 | 2.05 | 0.039775 |
| <b>496</b> | rme-2      | 9.23  | 8.2  | 2.05 | 0.043206 |
| <b>497</b> | ZC123.11   | 5.23  | 4.2  | 2.04 | 0.000246 |
| <b>498</b> | efhd-1     | 7.96  | 6.93 | 2.04 | 0.001648 |
| <b>499</b> | hda-4      | 8.44  | 7.41 | 2.04 | 0.004638 |
| <b>500</b> | F09C6.1    | 3.01  | 1.99 | 2.04 | 0.006183 |
| <b>501</b> | K08D12.6   | 6.32  | 5.29 | 2.04 | 0.006441 |
| <b>502</b> | snrp-200   | 8.71  | 7.69 | 2.04 | 0.008175 |
| <b>503</b> | T23E7.2    | 8.2   | 7.18 | 2.04 | 0.008569 |
| <b>504</b> | F32H2.7    | 4.48  | 3.45 | 2.04 | 0.011272 |
| <b>505</b> | zer-1      | 10.16 | 9.13 | 2.04 | 0.028611 |
| <b>506</b> | C18F10.7   | 8.96  | 7.94 | 2.04 | 0.038254 |
| <b>507</b> | spch-3     | 3.57  | 2.54 | 2.04 | 0.043729 |
| <b>508</b> | K10F12.7   | 4.73  | 3.71 | 2.03 | 0.000287 |
| <b>509</b> | exc-6      | 6.36  | 5.34 | 2.03 | 0.000485 |
| <b>510</b> |            | 5.16  | 4.13 | 2.03 | 0.004275 |
| <b>511</b> | ztf-6      | 9.11  | 8.09 | 2.03 | 0.004419 |
| <b>512</b> | fig-1      | 5.38  | 4.36 | 2.03 | 0.007526 |
| <b>513</b> | lip-1      | 9.82  | 8.8  | 2.03 | 0.008847 |
| <b>514</b> | E01B7.1    | 7.46  | 6.44 | 2.03 | 0.013086 |
| <b>515</b> | prk-2      | 6.83  | 5.81 | 2.03 | 0.026825 |
| <b>516</b> | daf-12     | 7.98  | 6.96 | 2.03 | 0.042469 |
| <b>517</b> | Y18H1A.7   | 6.17  | 5.15 | 2.02 | 0.003961 |
| <b>518</b> | T22B11.4   | 7.67  | 6.65 | 2.02 | 0.006948 |
| <b>519</b> | C36F7.22   | 4.29  | 3.27 | 2.02 | 0.00754  |
| <b>520</b> | mbk-1      | 8.25  | 7.23 | 2.02 | 0.01036  |
| <b>521</b> | unc-53     | 8.05  | 7.03 | 2.02 | 0.015119 |

|     |            |       |       |      |          |
|-----|------------|-------|-------|------|----------|
| 522 | zfp-1      | 9.1   | 8.09  | 2.02 | 0.017215 |
| 523 | uaf-1      | 8.86  | 7.84  | 2.02 | 0.03203  |
| 524 | T08B6.4    | 4.7   | 3.68  | 2.02 | 0.038465 |
| 525 | Y54E10A.26 | 3.33  | 2.32  | 2.02 | 0.042468 |
| 526 | clcc-17    | 5.74  | 4.74  | 2.01 | 0.002436 |
| 527 | F32B4.4    | 7.43  | 6.43  | 2.01 | 0.00678  |
| 528 | puf-9      | 9.41  | 8.41  | 2.01 | 0.009792 |
| 529 | lon-1      | 5.81  | 4.8   | 2.01 | 0.021603 |
| 530 | clcc-198   | 3.46  | 2.45  | 2.01 | 0.031336 |
| 531 | cyb-3      | 11.29 | 10.28 | 2.01 | 0.041633 |
| 532 | T20F5.7    | 8.71  | 7.7   | 2.01 | 0.043554 |
| 533 | K03E5.2    | 8.26  | 7.26  | 2    | 0.000334 |
| 534 | F46G10.2   | 7.24  | 6.24  | 2    | 0.000898 |
| 535 | Y43F8C.3   | 7.66  | 6.66  | 2    | 0.001349 |
| 536 | ark-1      | 7.43  | 6.43  | 2    | 0.003476 |
| 537 | scrm-5     | 3.18  | 2.18  | 2    | 0.006073 |
| 538 | H28G03.2   | 7.02  | 6.02  | 2    | 0.009016 |
| 539 | T21B6.16   | 2.81  | 1.81  | 2    | 0.011211 |
| 540 | Y51H1A.2   | 7.03  | 6.03  | 2    | 0.030958 |
| 541 | trp-2      | 4.9   | 3.9   | 2    | 0.032    |
| 542 | sma-5      | 8.33  | 7.34  | 1.99 | 0.000039 |
| 543 | chd-7      | 9.03  | 8.03  | 1.99 | 0.001416 |
| 544 | tam-1      | 9.27  | 8.27  | 1.99 | 0.001419 |
| 545 | pax-3      | 4.93  | 3.93  | 1.99 | 0.001842 |
| 546 | Y48E1B.2   | 6.23  | 5.23  | 1.99 | 0.003936 |
| 547 | Y54F10BM.9 | 5.87  | 4.88  | 1.99 | 0.004798 |
| 548 | T26H5.11   | 3.58  | 2.59  | 1.99 | 0.008595 |
| 549 | F27E5.3    | 4.64  | 3.65  | 1.99 | 0.017222 |
| 550 | spin-4     | 7.85  | 6.86  | 1.99 | 0.029375 |
| 551 | nspb-11    | 5.96  | 4.97  | 1.99 | 0.035006 |
| 552 | dhhc-1     | 8.32  | 7.33  | 1.98 | 0.001059 |
| 553 | ncx-2      | 8.76  | 7.78  | 1.98 | 0.001213 |
| 554 | ZC101.1    | 7.65  | 6.66  | 1.98 | 0.001394 |
| 555 | ZK1290.5   | 5.61  | 4.62  | 1.98 | 0.002956 |
| 556 | ZC455.1    | 5.62  | 4.64  | 1.98 | 0.00361  |

|            |           |       |       |      |          |
|------------|-----------|-------|-------|------|----------|
| <b>557</b> | col-109   | 7.08  | 6.09  | 1.98 | 0.004779 |
| <b>558</b> | T06E4.10  | 4.48  | 3.49  | 1.98 | 0.019104 |
| <b>559</b> | col-10    | 11.17 | 10.19 | 1.98 | 0.025227 |
| <b>560</b> | Y43F8C.9  | 5.23  | 4.25  | 1.98 | 0.029949 |
| <b>561</b> | F47B3.5   | 3.52  | 2.53  | 1.98 | 0.035193 |
| <b>562</b> | C39D10.1  | 2.93  | 1.95  | 1.98 | 0.035215 |
| <b>563</b> | K09H11.9  | 5.08  | 4.09  | 1.98 | 0.039209 |
| <b>564</b> | alg-2     | 7.47  | 6.49  | 1.97 | 0.000452 |
| <b>565</b> |           | 9.02  | 8.04  | 1.97 | 0.000632 |
| <b>566</b> | C45E5.4   | 4.98  | 4     | 1.97 | 0.001028 |
| <b>567</b> | maph-1.1  | 6.89  | 5.91  | 1.97 | 0.001089 |
| <b>568</b> | dnj-13    | 9.51  | 8.53  | 1.97 | 0.003108 |
| <b>569</b> | ceh-100   | 7.97  | 6.99  | 1.97 | 0.008597 |
| <b>570</b> | Y52B11C.1 | 8.49  | 7.51  | 1.97 | 0.010942 |
| <b>571</b> | alg-3     | 4.75  | 3.77  | 1.97 | 0.024217 |
| <b>572</b> | M106.2    | 8.78  | 7.8   | 1.97 | 0.027097 |
| <b>573</b> | grk-1     | 7.18  | 6.21  | 1.96 | 0.002115 |
| <b>574</b> | gei-4     | 9.06  | 8.09  | 1.96 | 0.003836 |
| <b>575</b> | C02E7.6   | 7.47  | 6.49  | 1.96 | 0.004275 |
| <b>576</b> | T19D12.4  | 7.51  | 6.54  | 1.96 | 0.005278 |
| <b>577</b> | ZK896.4   | 4.91  | 3.94  | 1.96 | 0.006058 |
| <b>578</b> | cbp-1     | 10.21 | 9.24  | 1.96 | 0.008765 |
| <b>579</b> | C34E11.2  | 6.44  | 5.47  | 1.96 | 0.016049 |
| <b>580</b> | tba-1     | 10.19 | 9.22  | 1.96 | 0.027727 |
| <b>581</b> | M57.2     | 8.08  | 7.11  | 1.96 | 0.047554 |
| <b>582</b> | ell-1     | 9.37  | 8.41  | 1.95 | 0.000529 |
| <b>583</b> | cmk-1     | 6.84  | 5.87  | 1.95 | 0.000538 |
| <b>584</b> | moe-3     | 9.2   | 8.23  | 1.95 | 0.001359 |
| <b>585</b> | Y82E9BL.5 | 2.1   | 1.14  | 1.95 | 0.001898 |
| <b>586</b> | mrp-7     | 8.33  | 7.37  | 1.95 | 0.003052 |
| <b>587</b> | pes-4     | 8.2   | 7.24  | 1.95 | 0.004466 |
| <b>588</b> | T28B11.7  | 6.3   | 5.34  | 1.95 | 0.010098 |
| <b>589</b> | F49B2.6   | 4.75  | 3.79  | 1.95 | 0.012139 |
| <b>590</b> | dmd-6     | 7.55  | 6.58  | 1.95 | 0.027743 |
| <b>591</b> | M01E5.3   | 9.8   | 8.84  | 1.95 | 0.043573 |

|            |            |       |       |      |          |
|------------|------------|-------|-------|------|----------|
| <b>592</b> | vab-19     | 6.84  | 5.88  | 1.94 | 0.000413 |
| <b>593</b> | pod-2      | 9.29  | 8.33  | 1.94 | 0.000551 |
| <b>594</b> | sop-2      | 6.76  | 5.81  | 1.94 | 0.000838 |
| <b>595</b> | Y105C5B.15 | 7.13  | 6.18  | 1.94 | 0.001397 |
| <b>596</b> | odc-1      | 7.96  | 7.01  | 1.94 | 0.002071 |
| <b>597</b> | bris-1     | 8.36  | 7.4   | 1.94 | 0.004541 |
| <b>598</b> | trp-4      | 4.01  | 3.05  | 1.94 | 0.005913 |
| <b>599</b> | sli-1      | 8.74  | 7.79  | 1.94 | 0.009503 |
| <b>600</b> | C45G7.4    | 6.21  | 5.26  | 1.94 | 0.011022 |
| <b>601</b> | ego-2      | 8.23  | 7.28  | 1.94 | 0.015213 |
| <b>602</b> | glct-6     | 7.49  | 6.53  | 1.94 | 0.01618  |
| <b>603</b> | rsp-8      | 7.51  | 6.55  | 1.94 | 0.02431  |
| <b>604</b> | sut-1      | 7.61  | 6.65  | 1.94 | 0.028094 |
| <b>605</b> | R06B10.1   | 2.9   | 1.94  | 1.94 | 0.034179 |
| <b>606</b> | lys-3      | 4.81  | 3.86  | 1.94 | 0.043506 |
| <b>607</b> | R05H10.3   | 8.27  | 7.31  | 1.94 | 0.048539 |
| <b>608</b> | C05E11.14  | 3.63  | 2.68  | 1.93 | 0.001034 |
| <b>609</b> | ubxn-3     | 9.87  | 8.93  | 1.93 | 0.001129 |
| <b>610</b> | lin-66     | 10.37 | 9.42  | 1.93 | 0.001224 |
| <b>611</b> | Y75B8A.13  | 6.97  | 6.02  | 1.93 | 0.019047 |
| <b>612</b> | B0041.11   | 6.99  | 6.05  | 1.93 | 0.025019 |
| <b>613</b> | 2RSSE.7    | 7.52  | 6.57  | 1.93 | 0.027419 |
| <b>614</b> | Y55F3BR.16 | 2.87  | 1.92  | 1.93 | 0.030923 |
| <b>615</b> | Y39B6A.81  | 2.87  | 1.92  | 1.93 | 0.030923 |
| <b>616</b> | rme-4      | 7.32  | 6.37  | 1.93 | 0.032238 |
| <b>617</b> | smg-6      | 7.15  | 6.21  | 1.93 | 0.035199 |
| <b>618</b> | B0491.9    | 3.08  | 2.13  | 1.93 | 0.038698 |
| <b>619</b> | wsp-1      | 8.28  | 7.34  | 1.92 | 0.001854 |
| <b>620</b> | T21C9.9    | 4.63  | 3.68  | 1.92 | 0.003978 |
| <b>621</b> | fri-1      | 7.79  | 6.85  | 1.92 | 0.006621 |
| <b>622</b> | tag-343    | 6.86  | 5.92  | 1.92 | 0.007178 |
| <b>623</b> | F09C6.3    | 3.94  | 3     | 1.92 | 0.011471 |
| <b>624</b> | epc-1      | 9.97  | 9.03  | 1.92 | 0.012329 |
| <b>625</b> | unc-54     | 11.02 | 10.08 | 1.92 | 0.013365 |
| <b>626</b> | D2045.2    | 7.14  | 6.2   | 1.92 | 0.01614  |

|     |            |       |      |      |          |
|-----|------------|-------|------|------|----------|
| 627 | F13D11.12  | 3.97  | 3.03 | 1.92 | 0.029635 |
| 628 | vgl-1      | 10.73 | 9.78 | 1.92 | 0.031824 |
| 629 | F13H6.18   | 4.04  | 3.1  | 1.92 | 0.036475 |
| 630 | mrp-4      | 8.4   | 7.46 | 1.92 | 0.040176 |
| 631 | trap-3     | 10.92 | 9.98 | 1.92 | 0.047398 |
| 632 | dpy-3      | 7.53  | 6.6  | 1.91 | 0.001696 |
| 633 | nas-30     | 4.57  | 3.64 | 1.91 | 0.003189 |
| 634 | spe-8      | 3.01  | 2.08 | 1.91 | 0.004159 |
| 635 | Y48G8AL.12 | 9.64  | 8.71 | 1.91 | 0.007445 |
| 636 | M60.7      | 9.2   | 8.27 | 1.91 | 0.008853 |
| 637 | C41H7.3    | 6.06  | 5.13 | 1.91 | 0.009758 |
| 638 | clec-4     | 4.82  | 3.89 | 1.91 | 0.009838 |
| 639 | T20F5.5    | 4.14  | 3.2  | 1.91 | 0.012353 |
| 640 | ZK616.65   | 2.56  | 1.63 | 1.91 | 0.018734 |
| 641 | imb-3      | 10.78 | 9.84 | 1.91 | 0.020473 |
| 642 | skpo-2     | 7.41  | 6.48 | 1.91 | 0.023277 |
| 643 | Y73B6BL.23 | 9.24  | 8.3  | 1.91 | 0.027616 |
| 644 | smg-2      | 8.38  | 7.44 | 1.91 | 0.036599 |
| 645 | pho-8      | 3.35  | 2.43 | 1.9  | 0.003269 |
| 646 | pqn-18     | 8.65  | 7.73 | 1.9  | 0.003281 |
| 647 | Y32H12A.8  | 7.32  | 6.4  | 1.9  | 0.003285 |
| 648 | let-526    | 9.78  | 8.85 | 1.9  | 0.005318 |
| 649 | C36H8.1    | 4.25  | 3.33 | 1.9  | 0.007911 |
| 650 | pqn-15     | 6.7   | 5.77 | 1.9  | 0.01146  |
| 651 | Y54E10A.25 | 4.14  | 3.21 | 1.9  | 0.013368 |
| 652 | Y39B6A.25  | 3.87  | 2.95 | 1.9  | 0.032816 |
| 653 | wago-10    | 3.24  | 2.31 | 1.9  | 0.037796 |
| 654 | W09D6.1    | 6.26  | 5.34 | 1.9  | 0.039808 |
| 655 | nape-2     | 5.06  | 4.14 | 1.89 | 0.000199 |
| 656 |            | 10.42 | 9.5  | 1.89 | 0.001656 |
| 657 | zfp-3      | 6.45  | 5.53 | 1.89 | 0.009144 |
| 658 | aexr-2     | 3.93  | 3.01 | 1.89 | 0.011272 |
| 659 | nrd-1      | 9.3   | 8.38 | 1.89 | 0.011767 |
| 660 | met-1      | 8.58  | 7.66 | 1.89 | 0.018274 |
| 661 | bcl-11     | 8.78  | 7.87 | 1.89 | 0.024396 |

|            |          |       |       |      |          |
|------------|----------|-------|-------|------|----------|
| <b>662</b> | D1044.6  | 7.55  | 6.63  | 1.89 | 0.036905 |
| <b>663</b> |          | 4.24  | 3.32  | 1.89 | 0.037898 |
| <b>664</b> | athp-2   | 7.98  | 7.06  | 1.89 | 0.045717 |
| <b>665</b> | T20G5.8  | 6.46  | 5.55  | 1.88 | 0.001146 |
| <b>666</b> | Y58A7A.3 | 4.79  | 3.88  | 1.88 | 0.004033 |
| <b>667</b> | C26F1.1  | 9.01  | 8.11  | 1.88 | 0.008213 |
| <b>668</b> | tbx-11   | 5.19  | 4.28  | 1.88 | 0.011254 |
| <b>669</b> | pqn-79   | 2.45  | 1.54  | 1.88 | 0.01167  |
| <b>670</b> | clcc-33  | 3.7   | 2.8   | 1.88 | 0.017028 |
| <b>671</b> | glct-3   | 2.93  | 2.02  | 1.88 | 0.01796  |
| <b>672</b> | fkx-7    | 9.79  | 8.88  | 1.88 | 0.018814 |
| <b>673</b> | T27B1.4  | 3.38  | 2.47  | 1.88 | 0.023683 |
| <b>674</b> | T01H3.7  | 5.37  | 4.45  | 1.88 | 0.025172 |
| <b>675</b> | clcc-173 | 7.65  | 6.74  | 1.88 | 0.027732 |
| <b>676</b> | ntl-3    | 5.78  | 4.87  | 1.88 | 0.03151  |
| <b>677</b> | C33G8.2  | 4.81  | 3.9   | 1.88 | 0.037087 |
| <b>678</b> | zyg-9    | 9     | 8.1   | 1.88 | 0.040468 |
| <b>679</b> | dpy-4    | 4.61  | 3.7   | 1.88 | 0.042112 |
| <b>680</b> | cpg-2    | 12.03 | 11.12 | 1.88 | 0.049945 |
| <b>681</b> | hil-3    | 8.48  | 7.58  | 1.87 | 0.000193 |
| <b>682</b> | lin-42   | 7.12  | 6.22  | 1.87 | 0.000248 |
| <b>683</b> | hecw-1   | 5.44  | 4.54  | 1.87 | 0.008311 |
| <b>684</b> | F22F7.7  | 5.6   | 4.7   | 1.87 | 0.01969  |
| <b>685</b> | T28F3.5  | 5.46  | 4.56  | 1.87 | 0.021965 |
| <b>686</b> | C54G6.3  | 5.28  | 4.38  | 1.87 | 0.029264 |
| <b>687</b> | T10E10.4 | 4.67  | 3.76  | 1.87 | 0.032743 |
| <b>688</b> | catp-4   | 3.75  | 2.84  | 1.87 | 0.034584 |
| <b>689</b> | C35A5.4  | 3.03  | 2.12  | 1.87 | 0.036364 |
| <b>690</b> | R03E9.9  | 4.96  | 4.06  | 1.87 | 0.039304 |
| <b>691</b> | taf-4    | 7.35  | 6.45  | 1.87 | 0.040248 |
| <b>692</b> | Y44E3A.4 | 9.19  | 8.28  | 1.87 | 0.04304  |
| <b>693</b> | ZK6.11   | 5.9   | 5     | 1.86 | 0.000216 |
| <b>694</b> | acd-1    | 5.17  | 4.27  | 1.86 | 0.000424 |
| <b>695</b> | gpd-1    | 7.66  | 6.77  | 1.86 | 0.001249 |
| <b>696</b> | F13D12.9 | 7.18  | 6.28  | 1.86 | 0.001682 |



|            |            |       |      |      |          |
|------------|------------|-------|------|------|----------|
| <b>697</b> | lit-1      | 8.78  | 7.88 | 1.86 | 0.002908 |
| <b>698</b> | cTel55X.1  | 6.71  | 5.81 | 1.86 | 0.004907 |
| <b>699</b> | T24D1.6    | 4.65  | 3.76 | 1.86 | 0.005774 |
| <b>700</b> | F53H2.3    | 9.34  | 8.44 | 1.86 | 0.007666 |
| <b>701</b> | Y71G12B.33 | 2.52  | 1.63 | 1.86 | 0.008573 |
| <b>702</b> | crh-1      | 8.85  | 7.95 | 1.86 | 0.013145 |
| <b>703</b> | npp-10     | 8.45  | 7.55 | 1.86 | 0.01661  |
| <b>704</b> | attf-5     | 6.3   | 5.41 | 1.86 | 0.025607 |
| <b>705</b> | T23H2.3    | 8.25  | 7.35 | 1.86 | 0.027157 |
| <b>706</b> | T23B3.5    | 3.14  | 2.24 | 1.86 | 0.029583 |
| <b>707</b> | cyld-1     | 9.7   | 8.8  | 1.86 | 0.04412  |
| <b>708</b> | kel-8      | 5.98  | 5.09 | 1.85 | 0.00008  |
| <b>709</b> | Y75B8A.6   | 8.82  | 7.93 | 1.85 | 0.000451 |
| <b>710</b> | W08E3.2    | 8.38  | 7.49 | 1.85 | 0.001012 |
| <b>711</b> | ama-1      | 9.63  | 8.75 | 1.85 | 0.002405 |
| <b>712</b> | B0457.10   | 3.83  | 2.94 | 1.85 | 0.004818 |
| <b>713</b> | C31H2.7    | 5.6   | 4.71 | 1.85 | 0.008262 |
| <b>714</b> | W06H8.5    | 10.6  | 9.72 | 1.85 | 0.008491 |
| <b>715</b> | C41H7.6    | 6.95  | 6.06 | 1.85 | 0.009121 |
| <b>716</b> | W06H8.6    | 10.86 | 9.97 | 1.85 | 0.009134 |
| <b>717</b> | clp-4      | 7.61  | 6.72 | 1.85 | 0.012586 |
| <b>718</b> | unc-89     | 8     | 7.11 | 1.85 | 0.013181 |
| <b>719</b> | ctl-2      | 8.49  | 7.6  | 1.85 | 0.025161 |
| <b>720</b> | sel-8      | 8.49  | 7.6  | 1.85 | 0.027266 |
| <b>721</b> | T28D6.5    | 5.16  | 4.27 | 1.85 | 0.048298 |
| <b>722</b> | cas-1      | 8.91  | 8.03 | 1.84 | 0.001666 |
| <b>723</b> | mul-1      | 4.33  | 3.45 | 1.84 | 0.001748 |
| <b>724</b> | nra-3      | 8.43  | 7.55 | 1.84 | 0.002755 |
| <b>725</b> | rhy-1      | 5.68  | 4.8  | 1.84 | 0.005812 |
| <b>726</b> | Y116A8C.24 | 2.95  | 2.07 | 1.84 | 0.010157 |
| <b>727</b> | Y50D4B.1   | 7.94  | 7.06 | 1.84 | 0.017809 |
| <b>728</b> | ZK1053.2   | 3.09  | 2.2  | 1.84 | 0.018485 |
| <b>729</b> | oac-14     | 4.77  | 3.89 | 1.84 | 0.027422 |
| <b>730</b> | pad-1      | 8.51  | 7.63 | 1.84 | 0.028564 |
| <b>731</b> | vab-2      | 7.4   | 6.53 | 1.83 | 0.000706 |

|     |           |       |      |      |          |
|-----|-----------|-------|------|------|----------|
| 732 | coh-1     | 7.73  | 6.85 | 1.83 | 0.001838 |
| 733 | pgl-3     | 8.51  | 7.64 | 1.83 | 0.004517 |
| 734 | Y51F10.3  | 8.81  | 7.94 | 1.83 | 0.00528  |
| 735 | Y46H3C.7  | 4.36  | 3.49 | 1.83 | 0.00544  |
| 736 | set-2     | 7.66  | 6.78 | 1.83 | 0.006256 |
| 737 | plep-1    | 2.68  | 1.81 | 1.83 | 0.008558 |
| 738 | eef-1A.1  | 9.82  | 8.95 | 1.83 | 0.009564 |
| 739 | col-157   | 5.58  | 4.7  | 1.83 | 0.010215 |
| 740 | ZK1067.2  | 8.06  | 7.19 | 1.83 | 0.016164 |
| 741 | K08A2.2   | 4.27  | 3.4  | 1.83 | 0.016422 |
| 742 | clh-4     | 5.45  | 4.58 | 1.83 | 0.017163 |
| 743 | W01H2.2   | 4.04  | 3.17 | 1.83 | 0.018888 |
| 744 | R01E6.10  | 3.64  | 2.77 | 1.83 | 0.025526 |
| 745 | yop-1     | 10.45 | 9.59 | 1.83 | 0.02677  |
| 746 | H37A05.6  | 3.95  | 3.08 | 1.83 | 0.027984 |
| 747 | ZK262.3   | 3.63  | 2.76 | 1.83 | 0.028395 |
| 748 | pif-1     | 7.04  | 6.16 | 1.83 | 0.031091 |
| 749 | tatn-1    | 9.46  | 8.59 | 1.83 | 0.034166 |
| 750 | pst-1     | 7.94  | 7.07 | 1.83 | 0.038143 |
| 751 | hlh-30    | 9.3   | 8.44 | 1.82 | 0.000173 |
| 752 | trx-3     | 9.23  | 8.37 | 1.82 | 0.000583 |
| 753 | acdh-7    | 7.95  | 7.09 | 1.82 | 0.003506 |
| 754 | din-1     | 8.21  | 7.34 | 1.82 | 0.003636 |
| 755 | cyd-1     | 7.45  | 6.59 | 1.82 | 0.00425  |
| 756 | ZK131.11  | 7.46  | 6.6  | 1.82 | 0.004738 |
| 757 | unc-33    | 7.3   | 6.43 | 1.82 | 0.007409 |
| 758 | T28B11.9  | 3.77  | 2.9  | 1.82 | 0.007867 |
| 759 | B0205.13  | 4.2   | 3.34 | 1.82 | 0.009164 |
| 760 | F11E6.3   | 6.28  | 5.42 | 1.82 | 0.010385 |
| 761 | R01H10.7  | 7.34  | 6.48 | 1.82 | 0.01299  |
| 762 | Y40B1A.2  | 6.31  | 5.45 | 1.82 | 0.017511 |
| 763 | ssl-1     | 9.21  | 8.35 | 1.82 | 0.01948  |
| 764 | F46E10.14 | 4.78  | 3.92 | 1.82 | 0.025359 |
| 765 | W08E12.5  | 7.51  | 6.65 | 1.82 | 0.026245 |
| 766 | mcd-1     | 7.65  | 6.79 | 1.82 | 0.027151 |

|     |            |      |      |      |          |
|-----|------------|------|------|------|----------|
| 767 | M01B2.8    | 2.41 | 1.55 | 1.82 | 0.031142 |
| 768 | ugt-12     | 4.83 | 3.98 | 1.81 | 0.002767 |
| 769 | eat-2      | 4.41 | 3.56 | 1.81 | 0.004215 |
| 770 | vab-1      | 9.26 | 8.4  | 1.81 | 0.005028 |
| 771 | W05F2.4    | 7.6  | 6.74 | 1.81 | 0.005894 |
| 772 | dot-1.3    | 2.44 | 1.59 | 1.81 | 0.00991  |
| 773 | F13H8.5    | 6.76 | 5.9  | 1.81 | 0.010615 |
| 774 | Y69A2AR.31 | 5.98 | 5.12 | 1.81 | 0.012028 |
| 775 | F54D8.6    | 7.29 | 6.43 | 1.81 | 0.014699 |
| 776 | cnp-3      | 7.94 | 7.08 | 1.81 | 0.022985 |
| 777 | Y34D9A.7   | 7.12 | 6.27 | 1.81 | 0.024883 |
| 778 | Y92H12A.2  | 7.78 | 6.93 | 1.81 | 0.028078 |
| 779 | Y48E1C.1   | 6.69 | 5.84 | 1.81 | 0.035756 |
| 780 | C34E11.15  | 8.03 | 7.18 | 1.81 | 0.043442 |
| 781 |            | 4.97 | 4.11 | 1.81 | 0.049123 |
| 782 | ZK354.7    | 4.87 | 4.02 | 1.81 | 0.049515 |
| 783 | hpk-1      | 9.31 | 8.46 | 1.8  | 0.000134 |
| 784 | H37A05.4   | 6.46 | 5.62 | 1.8  | 0.000172 |
| 785 | npp-11     | 8.04 | 7.19 | 1.8  | 0.000177 |
| 786 | his-24     | 9.68 | 8.83 | 1.8  | 0.000299 |
| 787 | lgx-1      | 6.55 | 5.71 | 1.8  | 0.000405 |
| 788 | plx-1      | 7.91 | 7.06 | 1.8  | 0.001828 |
| 789 | C34F11.5   | 3.93 | 3.08 | 1.8  | 0.002867 |
| 790 | Y39B6A.77  | 2.75 | 1.9  | 1.8  | 0.003145 |
| 791 | mir-58.1   | 6.24 | 5.39 | 1.8  | 0.007507 |
| 792 | dnj-19     | 9.51 | 8.67 | 1.8  | 0.007697 |
| 793 | dlk-1      | 7.97 | 7.12 | 1.8  | 0.00944  |
| 794 | C07A12.2   | 7.55 | 6.7  | 1.8  | 0.01019  |
| 795 | C24A8.6    | 8.19 | 7.34 | 1.8  | 0.014899 |
| 796 | F26H11.4   | 5.05 | 4.2  | 1.8  | 0.014949 |
| 797 | mth-2      | 5.18 | 4.33 | 1.8  | 0.015097 |
| 798 | C28C12.4   | 3.34 | 2.49 | 1.8  | 0.016026 |
| 799 | E01G6.9    | 4.41 | 3.56 | 1.8  | 0.017436 |
| 800 | nhl-2      | 9.98 | 9.13 | 1.8  | 0.017825 |
| 801 | attf-6     | 8.01 | 7.16 | 1.8  | 0.026751 |

|            |           |       |      |      |          |
|------------|-----------|-------|------|------|----------|
| <b>802</b> | T04C9.2   | 5.01  | 4.16 | 1.8  | 0.027015 |
| <b>803</b> | fbxb-71   | 3.49  | 2.64 | 1.8  | 0.031114 |
| <b>804</b> | F13H6.13  | 5.35  | 4.5  | 1.8  | 0.034547 |
| <b>805</b> | spr-5     | 7.69  | 6.84 | 1.8  | 0.045911 |
| <b>806</b> | tax-6     | 10.04 | 9.19 | 1.8  | 0.047967 |
| <b>807</b> | hsp-110   | 9.7   | 8.86 | 1.8  | 0.049489 |
| <b>808</b> | copb-2    | 9.37  | 8.53 | 1.79 | 0.001285 |
| <b>809</b> | catp-3    | 5.85  | 5.01 | 1.79 | 0.002917 |
| <b>810</b> | lin-40    | 8.31  | 7.47 | 1.79 | 0.005585 |
| <b>811</b> | K02A4.15  | 2.65  | 1.81 | 1.79 | 0.007176 |
| <b>812</b> | droe-4    | 8.2   | 7.36 | 1.79 | 0.007341 |
| <b>813</b> | clec-73   | 4.17  | 3.33 | 1.79 | 0.010206 |
| <b>814</b> | Y42H9B.7  | 4.06  | 3.23 | 1.79 | 0.010906 |
| <b>815</b> | F54D12.4  | 4.19  | 3.35 | 1.79 | 0.013276 |
| <b>816</b> | kcnl-1    | 5.06  | 4.22 | 1.79 | 0.0187   |
| <b>817</b> | T15D6.10  | 3.84  | 3    | 1.79 | 0.021093 |
| <b>818</b> | C05D12.11 | 4.24  | 3.41 | 1.79 | 0.026394 |
| <b>819</b> | T04C4.1   | 9.37  | 8.53 | 1.79 | 0.031101 |
| <b>820</b> | inft-2    | 7.54  | 6.7  | 1.79 | 0.037554 |
| <b>821</b> | dct-17    | 4.2   | 3.37 | 1.78 | 0.000177 |
| <b>822</b> | nep-17    | 10.21 | 9.38 | 1.78 | 0.006587 |
| <b>823</b> | cog-1     | 6.94  | 6.11 | 1.78 | 0.009005 |
| <b>824</b> | B0205.10  | 4.21  | 3.37 | 1.78 | 0.013892 |
| <b>825</b> | K08B12.6  | 3.84  | 3.01 | 1.78 | 0.021317 |
| <b>826</b> | F13D11.11 | 2.84  | 2    | 1.78 | 0.028292 |
| <b>827</b> | R02F11.2  | 7.26  | 6.42 | 1.78 | 0.035575 |
| <b>828</b> | Y56A3A.18 | 8.34  | 7.52 | 1.78 | 0.036384 |
| <b>829</b> | clec-24   | 4.43  | 3.59 | 1.78 | 0.043183 |
| <b>830</b> |           | 2.34  | 1.51 | 1.78 | 0.049105 |
| <b>831</b> | cdc-25.2  | 8.25  | 7.43 | 1.77 | 0.000793 |
| <b>832</b> | F26A10.22 | 4.18  | 3.36 | 1.77 | 0.002278 |
| <b>833</b> | glo-3     | 4.5   | 3.68 | 1.77 | 0.002763 |
| <b>834</b> | kin-1     | 7.6   | 6.78 | 1.77 | 0.006026 |
| <b>835</b> | spk-1     | 9.3   | 8.48 | 1.77 | 0.009478 |
| <b>836</b> | C09B9.4   | 4.5   | 3.67 | 1.77 | 0.009955 |

|            |            |       |       |      |          |
|------------|------------|-------|-------|------|----------|
| <b>837</b> | Y105E8A.25 | 8.52  | 7.7   | 1.77 | 0.010712 |
| <b>838</b> | grl-16     | 7.84  | 7.02  | 1.77 | 0.013443 |
| <b>839</b> | sur-2      | 8.4   | 7.58  | 1.77 | 0.014627 |
| <b>840</b> | F49E2.5    | 9.18  | 8.36  | 1.77 | 0.019187 |
| <b>841</b> | tre-5      | 7.18  | 6.35  | 1.77 | 0.025273 |
| <b>842</b> | ZK180.18   | 3.15  | 2.33  | 1.77 | 0.037025 |
| <b>843</b> | T22E5.11   | 3.02  | 2.2   | 1.77 | 0.047839 |
| <b>844</b> | Y106G6A.9  | 4.14  | 3.32  | 1.76 | 0.000095 |
| <b>845</b> | F16B12.6   | 7.08  | 6.27  | 1.76 | 0.000161 |
| <b>846</b> | F13B9.1    | 8.9   | 8.08  | 1.76 | 0.000216 |
| <b>847</b> | unc-71     | 8.38  | 7.57  | 1.76 | 0.000455 |
| <b>848</b> | M04B2.10   | 5.55  | 4.73  | 1.76 | 0.002168 |
| <b>849</b> | col-49     | 3.14  | 2.32  | 1.76 | 0.002239 |
| <b>850</b> | C23H4.6    | 5.05  | 4.23  | 1.76 | 0.002474 |
| <b>851</b> | dyn-1      | 8.26  | 7.44  | 1.76 | 0.003885 |
| <b>852</b> | mnk-1      | 10.88 | 10.06 | 1.76 | 0.00526  |
| <b>853</b> | mpz-1      | 7.21  | 6.39  | 1.76 | 0.008955 |
| <b>854</b> | F57F4.7    | 3.47  | 2.66  | 1.76 | 0.009675 |
| <b>855</b> | C09F9.8    | 3.31  | 2.5   | 1.76 | 0.011865 |
| <b>856</b> | laat-1     | 9.74  | 8.93  | 1.76 | 0.013304 |
| <b>857</b> | arrd-9     | 4.31  | 3.49  | 1.76 | 0.013698 |
| <b>858</b> | W09G10.8   | 3.18  | 2.36  | 1.76 | 0.015433 |
| <b>859</b> | M04G7.1    | 7     | 6.18  | 1.76 | 0.018651 |
| <b>860</b> | Y39B6A.42  | 9.2   | 8.39  | 1.76 | 0.018925 |
| <b>861</b> | C08E8.3    | 2.77  | 1.96  | 1.76 | 0.022973 |
| <b>862</b> | T04H1.2    | 9.62  | 8.8   | 1.76 | 0.026208 |
| <b>863</b> | W08F4.3    | 9.6   | 8.78  | 1.76 | 0.028036 |
| <b>864</b> | F22G12.4   | 6.68  | 5.87  | 1.76 | 0.028328 |
| <b>865</b> | cls-2      | 8.38  | 7.56  | 1.76 | 0.03334  |
| <b>866</b> | Y54G2A.11  | 9.34  | 8.53  | 1.76 | 0.036104 |
| <b>867</b> | Y48A6B.10  | 8.92  | 8.12  | 1.75 | 0.004531 |
| <b>868</b> | T24E12.10  | 4.19  | 3.38  | 1.75 | 0.011901 |
| <b>869</b> | kel-1      | 5.49  | 4.68  | 1.75 | 0.01484  |
| <b>870</b> | tbc-17     | 7.15  | 6.34  | 1.75 | 0.01761  |
| <b>871</b> | pac-1      | 8.32  | 7.51  | 1.75 | 0.027633 |

|            |           |       |       |      |          |
|------------|-----------|-------|-------|------|----------|
| <b>872</b> | C44E12.5  | 2.2   | 1.39  | 1.75 | 0.028042 |
| <b>873</b> | daf-16    | 10.1  | 9.29  | 1.75 | 0.028767 |
| <b>874</b> | Y47H10A.5 | 6.42  | 5.62  | 1.75 | 0.037571 |
| <b>875</b> | hsp-16.1  | 8.88  | 8.07  | 1.75 | 0.037705 |
| <b>876</b> | xpo-1     | 10.29 | 9.48  | 1.75 | 0.044208 |
| <b>877</b> | adss-1    | 9.79  | 8.98  | 1.75 | 0.045658 |
| <b>878</b> | unc-73    | 7.71  | 6.92  | 1.74 | 0.000482 |
| <b>879</b> | C23H3.11  | 2.3   | 1.5   | 1.74 | 0.002521 |
| <b>880</b> | C52B9.8   | 7.24  | 6.45  | 1.74 | 0.003512 |
| <b>881</b> | Y37A1B.17 | 7.32  | 6.53  | 1.74 | 0.00461  |
| <b>882</b> | ZK1127.6  | 4.21  | 3.41  | 1.74 | 0.009473 |
| <b>883</b> | clec-265  | 5.21  | 4.41  | 1.74 | 0.012848 |
| <b>884</b> | pqn-80    | 7.62  | 6.82  | 1.74 | 0.025309 |
| <b>885</b> | ins-12    | 4.27  | 3.47  | 1.74 | 0.029762 |
| <b>886</b> | K12D12.5  | 6.39  | 5.59  | 1.74 | 0.03854  |
| <b>887</b> | eif-3.B   | 9.12  | 8.32  | 1.74 | 0.039076 |
| <b>888</b> |           | 11.11 | 10.31 | 1.74 | 0.046206 |
| <b>889</b> | dgn-1     | 8.48  | 7.69  | 1.73 | 0.00083  |
| <b>890</b> | tep-1     | 7.94  | 7.15  | 1.73 | 0.001222 |
| <b>891</b> | nsy-1     | 8.61  | 7.82  | 1.73 | 0.001434 |
| <b>892</b> | egl-30    | 10.76 | 9.98  | 1.73 | 0.001558 |
| <b>893</b> |           | 8.42  | 7.62  | 1.73 | 0.007034 |
| <b>894</b> | F31E8.7   | 5.23  | 4.43  | 1.73 | 0.007647 |
| <b>895</b> | Y55B1BR.2 | 6.39  | 5.6   | 1.73 | 0.009501 |
| <b>896</b> | R08C7.5   | 2.87  | 2.08  | 1.73 | 0.010266 |
| <b>897</b> | spch-2    | 5.93  | 5.14  | 1.73 | 0.011475 |
| <b>898</b> | C30F2.2   | 3.22  | 2.42  | 1.73 | 0.011939 |
| <b>899</b> | rgs-7     | 7.22  | 6.42  | 1.73 | 0.01244  |
| <b>900</b> | F13D11.14 | 3.95  | 3.15  | 1.73 | 0.019243 |
| <b>901</b> | M01B12.4  | 8     | 7.21  | 1.73 | 0.026658 |
| <b>902</b> | gsp-3     | 5.64  | 4.85  | 1.73 | 0.028712 |
| <b>903</b> |           | 4.03  | 3.24  | 1.73 | 0.028974 |
| <b>904</b> | K04D7.14  | 2.41  | 1.62  | 1.73 | 0.045627 |
| <b>905</b> | ugt-16    | 3.17  | 2.37  | 1.73 | 0.046505 |
| <b>906</b> | enu-3.4   | 7.1   | 6.31  | 1.73 | 0.04728  |

|     |           |       |       |      |          |
|-----|-----------|-------|-------|------|----------|
| 907 | Y48G1C.10 | 7.08  | 6.29  | 1.73 | 0.047732 |
| 908 | H08J11.2  | 9.26  | 8.48  | 1.72 | 0.001464 |
| 909 | M03E7.4   | 5.31  | 4.53  | 1.72 | 0.007017 |
| 910 | smd-1     | 7.12  | 6.34  | 1.72 | 0.007498 |
| 911 | hrp-2     | 9.64  | 8.85  | 1.72 | 0.007615 |
| 912 | klp-15    | 5.2   | 4.42  | 1.72 | 0.009889 |
| 913 | vit-4     | 3.61  | 2.83  | 1.72 | 0.013262 |
| 914 | Y48G1C.8  | 8.2   | 7.42  | 1.72 | 0.013799 |
| 915 | T25G12.11 | 5.29  | 4.5   | 1.72 | 0.01744  |
| 916 | meg-3     | 6.45  | 5.67  | 1.72 | 0.017612 |
| 917 | ftt-2     | 11.48 | 10.7  | 1.72 | 0.020491 |
| 918 | Y43F8B.23 | 3.65  | 2.87  | 1.72 | 0.035247 |
| 919 | gap-3     | 8.63  | 7.84  | 1.72 | 0.041411 |
| 920 | ccch-1    | 8.28  | 7.5   | 1.72 | 0.046566 |
| 921 | T09B4.5   | 9.97  | 9.2   | 1.71 | 0.000564 |
| 922 | nhr-41    | 8.04  | 7.27  | 1.71 | 0.000599 |
| 923 | B0513.4   | 11.04 | 10.27 | 1.71 | 0.004432 |
| 924 | T15D6.1   | 1.99  | 1.22  | 1.71 | 0.011206 |
| 925 | feh-1     | 6.45  | 5.68  | 1.71 | 0.011969 |
| 926 |           | 2.88  | 2.11  | 1.71 | 0.015458 |
| 927 | nkcc-1    | 8.28  | 7.51  | 1.71 | 0.015857 |
| 928 | C36E6.1   | 7.55  | 6.77  | 1.71 | 0.018693 |
| 929 | F58F12.3  | 2.96  | 2.18  | 1.71 | 0.022581 |
| 930 | R02E12.10 | 5.15  | 4.38  | 1.71 | 0.023131 |
| 931 | Y60A3A.32 | 2.4   | 1.63  | 1.71 | 0.023299 |
| 932 | R119.5    | 6.77  | 5.99  | 1.71 | 0.024941 |
| 933 | C04F6.8   | 3.42  | 2.65  | 1.71 | 0.027931 |
| 934 | lin-1     | 6.27  | 5.5   | 1.71 | 0.029028 |
| 935 | C14A4.8   | 2.95  | 2.17  | 1.71 | 0.033571 |
| 936 | F14B6.2   | 5.54  | 4.76  | 1.71 | 0.0353   |
| 937 | Y17G7B.10 | 8.27  | 7.49  | 1.71 | 0.037816 |
| 938 | F53B6.5   | 2.8   | 2.03  | 1.71 | 0.047114 |
| 939 | T15B12.2  | 3.14  | 2.36  | 1.71 | 0.048963 |
| 940 | afd-1     | 9.16  | 8.4   | 1.7  | 0.000686 |
| 941 | F13H6.15  | 3.36  | 2.59  | 1.7  | 0.001611 |

|     |            |       |       |      |          |
|-----|------------|-------|-------|------|----------|
| 942 | aat-3      | 7.71  | 6.95  | 1.7  | 0.002733 |
| 943 | cpl-1      | 11.14 | 10.38 | 1.7  | 0.0029   |
| 944 | Y45F10D.2  | 3.1   | 2.34  | 1.7  | 0.006306 |
| 945 | T22F7.1    | 6.15  | 5.38  | 1.7  | 0.006419 |
| 946 | F47G6.3    | 3.15  | 2.38  | 1.7  | 0.00658  |
| 947 | laf-1      | 8.32  | 7.55  | 1.7  | 0.006844 |
| 948 | F54A3.2    | 7.49  | 6.72  | 1.7  | 0.0085   |
| 949 | sop-3      | 7.58  | 6.81  | 1.7  | 0.008937 |
| 950 | W03C9.1    | 3.92  | 3.16  | 1.7  | 0.00948  |
| 951 | R05D7.3    | 4.04  | 3.28  | 1.7  | 0.010739 |
| 952 | C49C3.9    | 7.01  | 6.24  | 1.7  | 0.013181 |
| 953 | nfya-1     | 7.26  | 6.49  | 1.7  | 0.013215 |
| 954 | F41F3.3    | 8.05  | 7.28  | 1.7  | 0.013537 |
| 955 | F13H6.8    | 4.87  | 4.1   | 1.7  | 0.013918 |
| 956 | lst-3      | 8.78  | 8.02  | 1.7  | 0.015579 |
| 957 | gei-8      | 7.6   | 6.84  | 1.7  | 0.017206 |
| 958 | F28A12.8   | 5.04  | 4.27  | 1.7  | 0.018751 |
| 959 | F19B10.1   | 5.71  | 4.94  | 1.7  | 0.021062 |
| 960 | ZK287.12   | 3.59  | 2.82  | 1.7  | 0.021481 |
| 961 | lin-36     | 9.23  | 8.46  | 1.7  | 0.025875 |
| 962 | ddx-35     | 6.87  | 6.11  | 1.7  | 0.027026 |
| 963 | F13B12.6   | 8.93  | 8.16  | 1.7  | 0.028514 |
| 964 | C10H11.11  | 6.28  | 5.52  | 1.7  | 0.0324   |
| 965 | Y69A2AR.19 | 3.51  | 2.75  | 1.7  | 0.037557 |
| 966 | Y67D8A.2   | 7.69  | 6.93  | 1.7  | 0.049042 |
| 967 | Y32G9B.1   | 3.97  | 3.21  | 1.69 | 0.000439 |
| 968 | myrf-1     | 7.27  | 6.52  | 1.69 | 0.001133 |
| 969 | C06B8.14   | 3.23  | 2.47  | 1.69 | 0.001481 |
| 970 | C46F11.6   | 7.8   | 7.04  | 1.69 | 0.00186  |
| 971 | T28B8.1    | 9.1   | 8.34  | 1.69 | 0.003715 |
| 972 | fox-1      | 7.69  | 6.94  | 1.69 | 0.004373 |
| 973 | pqn-35     | 6.65  | 5.9   | 1.69 | 0.005337 |
| 974 | T24B8.17   | 4.12  | 3.36  | 1.69 | 0.011571 |
| 975 | frm-8      | 6.1   | 5.34  | 1.69 | 0.012391 |
| 976 | nhr-48     | 7.33  | 6.57  | 1.69 | 0.013904 |



|             |             |       |      |      |          |
|-------------|-------------|-------|------|------|----------|
| <b>977</b>  | sem-4       | 7.5   | 6.74 | 1.69 | 0.016195 |
| <b>978</b>  | F56A11.9    | 4.05  | 3.29 | 1.69 | 0.031786 |
| <b>979</b>  | F40E10.5    | 6.07  | 5.31 | 1.69 | 0.034356 |
| <b>980</b>  | npp-3       | 9.15  | 8.39 | 1.69 | 0.03508  |
| <b>981</b>  | Y51A2D.13   | 7.07  | 6.31 | 1.69 | 0.048127 |
| <b>982</b>  | R06F6.7     | 8.04  | 7.29 | 1.68 | 0.000896 |
| <b>983</b>  | 2RSSE.1     | 8.47  | 7.72 | 1.68 | 0.000899 |
| <b>984</b>  | C10C5.3     | 3.98  | 3.23 | 1.68 | 0.001332 |
| <b>985</b>  | Y66D12A.24  | 5.37  | 4.62 | 1.68 | 0.001998 |
| <b>986</b>  | ncl-1       | 9.94  | 9.19 | 1.68 | 0.002289 |
| <b>987</b>  |             | 5.29  | 4.54 | 1.68 | 0.003705 |
| <b>988</b>  | F46C3.7     | 7.14  | 6.4  | 1.68 | 0.00413  |
| <b>989</b>  | lin-59      | 7.82  | 7.07 | 1.68 | 0.004282 |
| <b>990</b>  | cgef-1      | 7.77  | 7.03 | 1.68 | 0.007508 |
| <b>991</b>  | C16D6.1     | 5.43  | 4.68 | 1.68 | 0.009158 |
| <b>992</b>  | C33A11.2    | 7.47  | 6.73 | 1.68 | 0.010777 |
| <b>993</b>  | xpc-1       | 8.7   | 7.95 | 1.68 | 0.013973 |
| <b>994</b>  | W10G6.1     | 2.39  | 1.64 | 1.68 | 0.015902 |
| <b>995</b>  | ced-6       | 8.26  | 7.52 | 1.68 | 0.017202 |
| <b>996</b>  | M02B1.3     | 10.56 | 9.81 | 1.68 | 0.017698 |
| <b>997</b>  | lem-2       | 7.9   | 7.16 | 1.68 | 0.021417 |
| <b>998</b>  | F56E10.1    | 6.99  | 6.24 | 1.68 | 0.027935 |
| <b>999</b>  | F46B3.1     | 2.64  | 1.89 | 1.68 | 0.035104 |
| <b>1000</b> | Y39G10AR.16 | 5.08  | 4.33 | 1.68 | 0.043509 |
| <b>1001</b> | F56C9.10    | 9.51  | 8.76 | 1.68 | 0.044094 |
| <b>1002</b> | H09F14.1    | 6.24  | 5.5  | 1.68 | 0.04713  |
| <b>1003</b> | Y73C8B.1    | 5.77  | 5.03 | 1.67 | 0.000352 |
| <b>1004</b> | bed-2       | 7.61  | 6.87 | 1.67 | 0.001254 |
| <b>1005</b> | K08A8.18    | 3.75  | 3.01 | 1.67 | 0.001438 |
| <b>1006</b> | arf-6       | 9.01  | 8.27 | 1.67 | 0.003238 |
| <b>1007</b> | ceh-14      | 6.23  | 5.49 | 1.67 | 0.004382 |
| <b>1008</b> | fbxa-71     | 2.76  | 2.02 | 1.67 | 0.004614 |
| <b>1009</b> | frm-7       | 9.92  | 9.18 | 1.67 | 0.005643 |
| <b>1010</b> | acl-8       | 7.63  | 6.89 | 1.67 | 0.005909 |
| <b>1011</b> | ptrn-1      | 7.35  | 6.6  | 1.67 | 0.007779 |

|             |            |       |      |      |          |
|-------------|------------|-------|------|------|----------|
| <b>1012</b> | ipla-2     | 7.97  | 7.23 | 1.67 | 0.008605 |
| <b>1013</b> | pcf-11     | 9.23  | 8.49 | 1.67 | 0.01212  |
| <b>1014</b> | F16A11.5   | 3.51  | 2.76 | 1.67 | 0.013347 |
| <b>1015</b> | gck-3      | 8.28  | 7.55 | 1.67 | 0.019311 |
| <b>1016</b> |            | 6.84  | 6.1  | 1.67 | 0.023693 |
| <b>1017</b> | clec-41    | 4.65  | 3.91 | 1.67 | 0.028313 |
| <b>1018</b> | W09B7.1    | 4.18  | 3.44 | 1.67 | 0.03007  |
| <b>1019</b> | W09B7.1    | 4.18  | 3.44 | 1.67 | 0.03007  |
| <b>1020</b> | B0511.12   | 8.35  | 7.61 | 1.67 | 0.032535 |
| <b>1021</b> | cdc-48.1   | 10.41 | 9.67 | 1.67 | 0.037478 |
| <b>1022</b> | men-1      | 8.31  | 7.57 | 1.67 | 0.038116 |
| <b>1023</b> | ttr-29     | 6.13  | 5.38 | 1.67 | 0.042197 |
| <b>1024</b> | str-5      | 1.71  | 0.97 | 1.67 | 0.044701 |
| <b>1025</b> | Y56A3A.2   | 8.09  | 7.35 | 1.67 | 0.047886 |
| <b>1026</b> | srr-4      | 6.46  | 5.72 | 1.66 | 0.000891 |
| <b>1027</b> | C13G3.1    | 7.7   | 6.97 | 1.66 | 0.002296 |
| <b>1028</b> | T11F9.12   | 6.84  | 6.11 | 1.66 | 0.002974 |
| <b>1029</b> | F35B12.3   | 7.41  | 6.68 | 1.66 | 0.003802 |
| <b>1030</b> | catp-1     | 6.75  | 6.02 | 1.66 | 0.004601 |
| <b>1031</b> | F47G4.4    | 6.8   | 6.06 | 1.66 | 0.00553  |
| <b>1032</b> | nhl-1      | 8.03  | 7.29 | 1.66 | 0.005734 |
| <b>1033</b> | F48C1.12   | 6.44  | 5.71 | 1.66 | 0.005812 |
| <b>1034</b> | Y37E11AL.6 | 6.99  | 6.26 | 1.66 | 0.00822  |
| <b>1035</b> | act-5      | 7.62  | 6.88 | 1.66 | 0.009112 |
| <b>1036</b> |            | 7.6   | 6.87 | 1.66 | 0.009804 |
| <b>1037</b> | K10C2.1    | 8.15  | 7.42 | 1.66 | 0.011334 |
| <b>1038</b> | pqe-1      | 8.99  | 8.26 | 1.66 | 0.012232 |
| <b>1039</b> | W02B12.12  | 4.93  | 4.19 | 1.66 | 0.014199 |
| <b>1040</b> | unc-82     | 7.02  | 6.29 | 1.66 | 0.01433  |
| <b>1041</b> | stau-1     | 7.02  | 6.29 | 1.66 | 0.015183 |
| <b>1042</b> | cgef-1     | 5.97  | 5.24 | 1.66 | 0.017472 |
| <b>1043</b> | ref-1      | 5.32  | 4.59 | 1.66 | 0.019295 |
| <b>1044</b> | F49C12.15  | 5.14  | 4.41 | 1.66 | 0.028203 |
| <b>1045</b> | F58D2.2    | 4.1   | 3.37 | 1.66 | 0.035083 |
| <b>1046</b> | hsp-16.1   | 8.35  | 7.61 | 1.66 | 0.039239 |

|             |            |      |      |      |          |
|-------------|------------|------|------|------|----------|
| <b>1047</b> | K03H9.13   | 2.71 | 1.97 | 1.66 | 0.040314 |
| <b>1048</b> | ZK354.3    | 1.91 | 1.18 | 1.66 | 0.043196 |
| <b>1049</b> | rhgf-2     | 7.55 | 6.83 | 1.65 | 0.000117 |
| <b>1050</b> | R04B3.7    | 4.54 | 3.82 | 1.65 | 0.000164 |
| <b>1051</b> | Y105C5B.3  | 2.09 | 1.37 | 1.65 | 0.000905 |
| <b>1052</b> | T04F8.9    | 5.01 | 4.29 | 1.65 | 0.001814 |
| <b>1053</b> | F20B10.3   | 7.12 | 6.4  | 1.65 | 0.003385 |
| <b>1054</b> | Y53F4B.12  | 4.7  | 3.98 | 1.65 | 0.003803 |
| <b>1055</b> | F44D12.8   | 3.8  | 3.08 | 1.65 | 0.009454 |
| <b>1056</b> | T24D5.5    | 2.76 | 2.04 | 1.65 | 0.010637 |
| <b>1057</b> | tlk-1      | 9.75 | 9.02 | 1.65 | 0.01142  |
| <b>1058</b> | Y53F4B.18  | 8.81 | 8.09 | 1.65 | 0.013201 |
| <b>1059</b> | F10D2.8    | 2.72 | 2    | 1.65 | 0.021683 |
| <b>1060</b> | K08B5.3    | 3.5  | 2.77 | 1.65 | 0.024874 |
| <b>1061</b> | egl-8      | 8.44 | 7.71 | 1.65 | 0.027863 |
| <b>1062</b> | col-97     | 5.7  | 4.98 | 1.65 | 0.035719 |
| <b>1063</b> | C13B4.1    | 7.4  | 6.68 | 1.65 | 0.038527 |
| <b>1064</b> | F38B6.18   | 4.06 | 3.33 | 1.65 | 0.041648 |
| <b>1065</b> | W09D12.5   | 3.44 | 2.72 | 1.65 | 0.044376 |
| <b>1066</b> | W07G4.12   | 3.48 | 2.76 | 1.65 | 0.044686 |
| <b>1067</b> | Y24D9A.7   | 3.23 | 2.51 | 1.65 | 0.04721  |
| <b>1068</b> | R13F6.14   | 3.24 | 2.53 | 1.64 | 0.000573 |
| <b>1069</b> | frm-5.2    | 7.72 | 7.01 | 1.64 | 0.000625 |
| <b>1070</b> | daf-7      | 5.1  | 4.39 | 1.64 | 0.001032 |
| <b>1071</b> | Y110A2AL.3 | 8.01 | 7.3  | 1.64 | 0.002769 |
| <b>1072</b> | R10F2.4    | 3.84 | 3.13 | 1.64 | 0.003014 |
| <b>1073</b> | E01G6.1    | 5.45 | 4.74 | 1.64 | 0.007224 |
| <b>1074</b> | Y75B8A.24  | 7.43 | 6.72 | 1.64 | 0.008069 |
| <b>1075</b> | ZK154.5    | 6.96 | 6.25 | 1.64 | 0.00913  |
| <b>1076</b> | pole-1     | 7.86 | 7.15 | 1.64 | 0.009685 |
| <b>1077</b> | haly-1     | 9.61 | 8.89 | 1.64 | 0.011029 |
| <b>1078</b> | ZK354.6    | 3.19 | 2.47 | 1.64 | 0.012591 |
| <b>1079</b> | scl-3      | 7.31 | 6.6  | 1.64 | 0.016741 |
| <b>1080</b> | sri-31     | 2.73 | 2.01 | 1.64 | 0.019185 |
| <b>1081</b> | F35A5.4    | 4.55 | 3.83 | 1.64 | 0.019858 |

|             |            |       |       |      |          |
|-------------|------------|-------|-------|------|----------|
| <b>1082</b> | nspb-6     | 4.13  | 3.41  | 1.64 | 0.021665 |
| <b>1083</b> | sym-4      | 7.51  | 6.8   | 1.64 | 0.026427 |
| <b>1084</b> | klu-1      | 5.62  | 4.91  | 1.64 | 0.028129 |
| <b>1085</b> | B0336.3    | 8.85  | 8.14  | 1.64 | 0.028232 |
| <b>1086</b> | ifet-1     | 10.4  | 9.69  | 1.64 | 0.028907 |
| <b>1087</b> | ets-6      | 7.74  | 7.03  | 1.64 | 0.030609 |
| <b>1088</b> | csb-1      | 6.29  | 5.57  | 1.64 | 0.033614 |
| <b>1089</b> | C27F2.8    | 9     | 8.29  | 1.64 | 0.040279 |
| <b>1090</b> | pxf-1      | 8.84  | 8.13  | 1.64 | 0.043019 |
| <b>1091</b> | lin-10     | 7.53  | 6.82  | 1.63 | 0.000521 |
| <b>1092</b> | hsp-4      | 8.88  | 8.17  | 1.63 | 0.001352 |
| <b>1093</b> | let-2      | 8.82  | 8.12  | 1.63 | 0.002075 |
| <b>1094</b> | Y105E8A.36 | 9.02  | 8.31  | 1.63 | 0.003479 |
| <b>1095</b> | F25B3.5    | 4.78  | 4.08  | 1.63 | 0.005629 |
| <b>1096</b> | fkx-2      | 5.09  | 4.39  | 1.63 | 0.005817 |
| <b>1097</b> | rho-1      | 11.34 | 10.64 | 1.63 | 0.009444 |
| <b>1098</b> | gfi-1      | 5.09  | 4.38  | 1.63 | 0.010146 |
| <b>1099</b> | C16E9.16   | 4.57  | 3.87  | 1.63 | 0.017279 |
| <b>1100</b> | srw-10     | 2.97  | 2.27  | 1.63 | 0.017651 |
| <b>1101</b> | pdk-1      | 7.52  | 6.82  | 1.63 | 0.019455 |
| <b>1102</b> | gln-2      | 3.65  | 2.94  | 1.63 | 0.020184 |
| <b>1103</b> | Y62F5A.10  | 4.95  | 4.24  | 1.63 | 0.021854 |
| <b>1104</b> | fer-1      | 3.15  | 2.44  | 1.63 | 0.028511 |
| <b>1105</b> | Y59A8B.24  | 3.29  | 2.59  | 1.63 | 0.035329 |
| <b>1106</b> | C02B10.6   | 5.62  | 4.92  | 1.63 | 0.04014  |
| <b>1107</b> | Y76A2B.8   | 3.77  | 3.07  | 1.63 | 0.040936 |
| <b>1108</b> | B0285.14   | 2.79  | 2.09  | 1.63 | 0.04732  |
| <b>1109</b> | C29E6.10   | 2.29  | 1.59  | 1.63 | 0.048087 |
| <b>1110</b> | C45B2.18   | 2.42  | 1.72  | 1.63 | 0.049797 |
| <b>1111</b> | F28B4.3    | 7.22  | 6.52  | 1.62 | 0.000178 |
| <b>1112</b> | eat-17     | 8.04  | 7.34  | 1.62 | 0.000764 |
| <b>1113</b> | T25B9.6    | 4.37  | 3.68  | 1.62 | 0.001244 |
| <b>1114</b> | zfh-2      | 7.81  | 7.11  | 1.62 | 0.001326 |
| <b>1115</b> | alg-1      | 9.97  | 9.27  | 1.62 | 0.001754 |
| <b>1116</b> | cst-2      | 5.94  | 5.25  | 1.62 | 0.00207  |

|             |          |       |       |      |          |
|-------------|----------|-------|-------|------|----------|
| <b>1117</b> | let-526  | 10.21 | 9.52  | 1.62 | 0.005017 |
| <b>1118</b> | glit-1   | 6.24  | 5.54  | 1.62 | 0.006133 |
| <b>1119</b> | ddx-17   | 8.59  | 7.9   | 1.62 | 0.007513 |
| <b>1120</b> | ham-1    | 7.37  | 6.67  | 1.62 | 0.009592 |
| <b>1121</b> | eel-1    | 9.45  | 8.75  | 1.62 | 0.011857 |
| <b>1122</b> | F35C11.3 | 3.47  | 2.77  | 1.62 | 0.013024 |
| <b>1123</b> | tbc-10   | 6.95  | 6.25  | 1.62 | 0.015128 |
| <b>1124</b> | daf-19   | 7.67  | 6.98  | 1.62 | 0.017538 |
| <b>1125</b> | mod-5    | 6.3   | 5.61  | 1.62 | 0.018439 |
| <b>1126</b> | C03A7.2  | 3.4   | 2.71  | 1.62 | 0.019358 |
| <b>1127</b> | lin-8    | 5.55  | 4.85  | 1.62 | 0.025856 |
| <b>1128</b> | F33E11.2 | 6.37  | 5.68  | 1.62 | 0.030923 |
| <b>1129</b> | C06C3.7  | 3.14  | 2.44  | 1.62 | 0.034064 |
| <b>1130</b> | K05B2.2  | 7.99  | 7.29  | 1.62 | 0.036271 |
| <b>1131</b> | spn-4    | 10.66 | 9.97  | 1.62 | 0.041309 |
| <b>1132</b> | Y6E2A.10 | 2.78  | 2.09  | 1.62 | 0.041917 |
| <b>1133</b> | Y95B8A.8 | 8.54  | 7.84  | 1.62 | 0.043383 |
| <b>1134</b> | F54F12.3 | 4.31  | 3.61  | 1.62 | 0.04852  |
| <b>1135</b> | sti-1    | 8.91  | 8.23  | 1.61 | 0.000621 |
| <b>1136</b> | unc-10   | 7.04  | 6.36  | 1.61 | 0.001322 |
| <b>1137</b> | fbxa-168 | 3.52  | 2.83  | 1.61 | 0.002426 |
| <b>1138</b> | let-711  | 9.84  | 9.15  | 1.61 | 0.003033 |
| <b>1139</b> | sos-1    | 8.83  | 8.15  | 1.61 | 0.003522 |
| <b>1140</b> | cyk-1    | 8.53  | 7.84  | 1.61 | 0.003974 |
| <b>1141</b> | hgap-1   | 7.74  | 7.05  | 1.61 | 0.004161 |
| <b>1142</b> | sec-61   | 8.11  | 7.42  | 1.61 | 0.004631 |
| <b>1143</b> | zyx-1    | 8.75  | 8.07  | 1.61 | 0.007448 |
| <b>1144</b> | R07G3.10 | 3.75  | 3.06  | 1.61 | 0.008087 |
| <b>1145</b> | gei-6    | 8.08  | 7.4   | 1.61 | 0.011556 |
| <b>1146</b> | grl-6    | 4.07  | 3.38  | 1.61 | 0.017903 |
| <b>1147</b> | T23E1.5  | 4.59  | 3.9   | 1.61 | 0.018006 |
| <b>1148</b> | zag-1    | 7.32  | 6.63  | 1.61 | 0.018243 |
| <b>1149</b> | R04E5.9  | 8.07  | 7.38  | 1.61 | 0.020875 |
| <b>1150</b> | toh-1    | 6.54  | 5.85  | 1.61 | 0.021307 |
| <b>1151</b> | vig-1    | 11.07 | 10.38 | 1.61 | 0.021349 |

|      |           |       |       |      |          |
|------|-----------|-------|-------|------|----------|
| 1152 | C52E12.1  | 8.23  | 7.54  | 1.61 | 0.024155 |
| 1153 | BE10.7    | 3.16  | 2.47  | 1.61 | 0.027223 |
| 1154 | C18D1.12  | 3.72  | 3.04  | 1.61 | 0.027232 |
| 1155 | Y43F8A.2  | 4.4   | 3.71  | 1.61 | 0.028643 |
| 1156 | gcy-21    | 2.72  | 2.03  | 1.61 | 0.02963  |
| 1157 | vps-15    | 8.21  | 7.51  | 1.61 | 0.029909 |
| 1158 | CE7X_3.3  | 8.75  | 8.06  | 1.61 | 0.030831 |
| 1159 |           | 5.69  | 5     | 1.61 | 0.03447  |
| 1160 | Y38C1BA.1 | 4.35  | 3.66  | 1.61 | 0.043738 |
| 1161 | egl-18    | 8.52  | 7.84  | 1.6  | 0.000035 |
| 1162 | acly-1    | 7.59  | 6.91  | 1.6  | 0.000048 |
| 1163 | C03F11.2  | 5.7   | 5.02  | 1.6  | 0.000195 |
| 1164 | Iron-11   | 7.99  | 7.31  | 1.6  | 0.000608 |
| 1165 | nep-26    | 7.23  | 6.55  | 1.6  | 0.000706 |
| 1166 | eat-17    | 7.18  | 6.5   | 1.6  | 0.000934 |
| 1167 | slc-17.8  | 4.29  | 3.61  | 1.6  | 0.001432 |
| 1168 | W09G12.7  | 5.37  | 4.69  | 1.6  | 0.004364 |
| 1169 | K08B4.43  | 3.06  | 2.38  | 1.6  | 0.005502 |
| 1170 | ifd-2     | 7.42  | 6.75  | 1.6  | 0.00788  |
| 1171 | hosl-1    | 6.72  | 6.04  | 1.6  | 0.009132 |
| 1172 | F16F9.9   | 2.08  | 1.39  | 1.6  | 0.009551 |
| 1173 | car-1     | 10.89 | 10.21 | 1.6  | 0.01034  |
| 1174 | Y77E11A.7 | 8.76  | 8.08  | 1.6  | 0.014772 |
| 1175 | best-11   | 2.22  | 1.55  | 1.6  | 0.016397 |
| 1176 | T28B11.3  | 3.88  | 3.2   | 1.6  | 0.016585 |
| 1177 | unc-26    | 7.04  | 6.37  | 1.6  | 0.01933  |
| 1178 | trap-1    | 10.36 | 9.69  | 1.6  | 0.025142 |
| 1179 | Y41D4A.4  | 9.14  | 8.46  | 1.6  | 0.025464 |
| 1180 | let-765   | 9.18  | 8.5   | 1.6  | 0.03051  |
| 1181 | acs-10    | 3.62  | 2.94  | 1.6  | 0.030663 |
| 1182 | sfxn-1.2  | 2.82  | 2.14  | 1.6  | 0.031918 |
| 1183 | T08A11.1  | 7.28  | 6.6   | 1.6  | 0.03839  |
| 1184 | twk-29    | 4.64  | 3.96  | 1.6  | 0.040929 |
| 1185 | jac-1     | 6.32  | 5.64  | 1.59 | 0.000352 |
| 1186 | hmr-1     | 7.39  | 6.73  | 1.59 | 0.000487 |

|             |            |       |       |      |          |
|-------------|------------|-------|-------|------|----------|
| <b>1187</b> | F41G3.10   | 8.77  | 8.11  | 1.59 | 0.001399 |
| <b>1188</b> | sem-2      | 7.67  | 7.01  | 1.59 | 0.001455 |
| <b>1189</b> | mig-1      | 7.04  | 6.37  | 1.59 | 0.001719 |
| <b>1190</b> | pqn-88     | 4.93  | 4.27  | 1.59 | 0.001738 |
| <b>1191</b> | myrf-2     | 8.36  | 7.7   | 1.59 | 0.002054 |
| <b>1192</b> | T26H5.10   | 3.5   | 2.83  | 1.59 | 0.002702 |
| <b>1193</b> | set-12     | 4.93  | 4.27  | 1.59 | 0.006488 |
| <b>1194</b> | vit-6      | 12.03 | 11.36 | 1.59 | 0.007918 |
| <b>1195</b> | sec-24.2   | 9.27  | 8.6   | 1.59 | 0.011334 |
| <b>1196</b> | ubq-1      | 10.1  | 9.43  | 1.59 | 0.014777 |
| <b>1197</b> | nep-2      | 7.49  | 6.82  | 1.59 | 0.019119 |
| <b>1198</b> | T10E9.3    | 5.6   | 4.93  | 1.59 | 0.01992  |
| <b>1199</b> | nas-38     | 4.4   | 3.73  | 1.59 | 0.021118 |
| <b>1200</b> | sqd-1      | 11.57 | 10.91 | 1.59 | 0.024202 |
| <b>1201</b> | M151.4     | 2.61  | 1.94  | 1.59 | 0.025871 |
| <b>1202</b> | ceh-62     | 5.6   | 4.93  | 1.59 | 0.028375 |
| <b>1203</b> | B0457.16   | 2.8   | 2.13  | 1.59 | 0.030255 |
| <b>1204</b> | ncx-9      | 1.97  | 1.3   | 1.59 | 0.033135 |
| <b>1205</b> | ppgn-1     | 6.92  | 6.24  | 1.59 | 0.037198 |
| <b>1206</b> | lap-2      | 10.7  | 10.03 | 1.59 | 0.041315 |
| <b>1207</b> | scrm-6     | 3.8   | 3.13  | 1.59 | 0.042774 |
| <b>1208</b> | oxi-1      | 7.07  | 6.41  | 1.59 | 0.045978 |
| <b>1209</b> |            | 2.87  | 2.2   | 1.59 | 0.048586 |
| <b>1210</b> | Y54F10BM.1 | 8.81  | 8.15  | 1.58 | 0.000383 |
| <b>1211</b> | ipla-4     | 3.67  | 3.01  | 1.58 | 0.002526 |
| <b>1212</b> | Y49F6B.15  | 2.98  | 2.32  | 1.58 | 0.004416 |
| <b>1213</b> | mml-1      | 8.23  | 7.57  | 1.58 | 0.00541  |
| <b>1214</b> | C05B5.4    | 5.01  | 4.35  | 1.58 | 0.005486 |
| <b>1215</b> | phat-4     | 4.7   | 4.03  | 1.58 | 0.005791 |
| <b>1216</b> | ketn-1     | 8.01  | 7.36  | 1.58 | 0.006267 |
| <b>1217</b> | rin-1      | 8.34  | 7.68  | 1.58 | 0.007134 |
| <b>1218</b> | R02F2.5    | 4.24  | 3.57  | 1.58 | 0.008507 |
| <b>1219</b> | F57C7.8    | 4.95  | 4.3   | 1.58 | 0.010159 |
| <b>1220</b> | C04A11.2   | 5.52  | 4.86  | 1.58 | 0.011144 |
| <b>1221</b> | nas-15     | 4.49  | 3.83  | 1.58 | 0.012129 |

|      |           |       |      |      |          |
|------|-----------|-------|------|------|----------|
| 1222 | hpo-13    | 6.88  | 6.22 | 1.58 | 0.018911 |
| 1223 | M195.2    | 6.71  | 6.05 | 1.58 | 0.024118 |
| 1224 | clip-1    | 8     | 7.34 | 1.58 | 0.025563 |
| 1225 | pqn-85    | 8.36  | 7.7  | 1.58 | 0.027732 |
| 1226 |           | 10.31 | 9.65 | 1.58 | 0.02996  |
| 1227 | K10D6.24  | 4.65  | 4    | 1.58 | 0.036397 |
| 1228 | R11B5.3   | 4.2   | 3.54 | 1.58 | 0.039609 |
| 1229 | tbc-14    | 8.31  | 7.66 | 1.58 | 0.040386 |
| 1230 | Y57G11C.5 | 3.94  | 3.28 | 1.58 | 0.049605 |
| 1231 | ZK1053.4  | 6.26  | 5.61 | 1.57 | 0.001433 |
| 1232 | R05D3.5   | 4.62  | 3.97 | 1.57 | 0.001593 |
| 1233 | dab-1     | 8.14  | 7.49 | 1.57 | 0.003166 |
| 1234 |           | 4.02  | 3.36 | 1.57 | 0.006168 |
| 1235 | H10E21.5  | 6.66  | 6.01 | 1.57 | 0.010178 |
| 1236 | B0457.6   | 6.15  | 5.51 | 1.57 | 0.011576 |
| 1237 | lem-4     | 6.35  | 5.69 | 1.57 | 0.014087 |
| 1238 | C17D12.12 | 3.14  | 2.49 | 1.57 | 0.015292 |
| 1239 | C14C6.2   | 4.96  | 4.31 | 1.57 | 0.017094 |
| 1240 | col-107   | 9.08  | 8.43 | 1.57 | 0.021841 |
| 1241 | ZC506.8   | 2.41  | 1.75 | 1.57 | 0.023859 |
| 1242 | F53B3.3   | 6.1   | 5.44 | 1.57 | 0.025312 |
| 1243 | obr-1     | 6.97  | 6.32 | 1.57 | 0.030424 |
| 1244 | F40H3.15  | 2.29  | 1.64 | 1.57 | 0.031334 |
| 1245 | W04A8.6   | 7.99  | 7.34 | 1.57 | 0.037527 |
| 1246 | shc-1     | 5.8   | 5.15 | 1.57 | 0.038061 |
| 1247 | B0198.7   | 3.29  | 2.64 | 1.57 | 0.042405 |
| 1248 | lec-1     | 9.39  | 8.74 | 1.56 | 0.000535 |
| 1249 | hpo-28    | 5.57  | 4.94 | 1.56 | 0.000906 |
| 1250 | dpy-21    | 6.49  | 5.85 | 1.56 | 0.001887 |
| 1251 | F01D5.2   | 2.65  | 2    | 1.56 | 0.002009 |
| 1252 | die-1     | 7.68  | 7.04 | 1.56 | 0.002428 |
| 1253 | K02H8.4   | 4.76  | 4.12 | 1.56 | 0.002712 |
| 1254 | K01A6.9   | 3.84  | 3.2  | 1.56 | 0.003425 |
| 1255 | BE10.1    | 3.66  | 3.02 | 1.56 | 0.003437 |
| 1256 | eat-20    | 6.1   | 5.46 | 1.56 | 0.00443  |



|      |            |       |       |      |          |
|------|------------|-------|-------|------|----------|
| 1257 | gfi-3      | 6.56  | 5.92  | 1.56 | 0.005547 |
| 1258 | atg-9      | 8.74  | 8.1   | 1.56 | 0.00624  |
| 1259 | act-4      | 6.88  | 6.24  | 1.56 | 0.007136 |
| 1260 | ptr-21     | 7.39  | 6.75  | 1.56 | 0.008511 |
| 1261 | ZC416.6    | 7.67  | 7.03  | 1.56 | 0.009766 |
| 1262 | T01D3.3    | 5.6   | 4.96  | 1.56 | 0.011184 |
| 1263 | ZK622.4    | 6.94  | 6.3   | 1.56 | 0.013306 |
| 1264 | cey-1      | 11.54 | 10.9  | 1.56 | 0.016998 |
| 1265 | Y110A2AL.9 | 7.34  | 6.7   | 1.56 | 0.019266 |
| 1266 | C33C12.10  | 6.34  | 5.69  | 1.56 | 0.021444 |
| 1267 | F15D3.6    | 8.96  | 8.32  | 1.56 | 0.032765 |
| 1268 | mig-38     | 9.61  | 8.96  | 1.56 | 0.033657 |
| 1269 | unc-30     | 5.72  | 5.08  | 1.56 | 0.036204 |
| 1270 | pqn-29     | 4.33  | 3.68  | 1.56 | 0.036724 |
| 1271 |            | 2.46  | 1.81  | 1.56 | 0.036814 |
| 1272 | D1007.22   | 3.53  | 2.88  | 1.56 | 0.038336 |
| 1273 | F21F3.6    | 11.32 | 10.68 | 1.56 | 0.049057 |
| 1274 | acs-1      | 8.25  | 7.63  | 1.55 | 0.00003  |
| 1275 | pqn-65     | 7.87  | 7.23  | 1.55 | 0.000053 |
| 1276 | set-16     | 8.27  | 7.64  | 1.55 | 0.000582 |
| 1277 | Y41C4A.29  | 7.33  | 6.7   | 1.55 | 0.000838 |
| 1278 | fust-1     | 7.21  | 6.58  | 1.55 | 0.001986 |
| 1279 | pat-12     | 7.5   | 6.87  | 1.55 | 0.002072 |
| 1280 | aakg-1     | 9.19  | 8.56  | 1.55 | 0.003005 |
| 1281 | Y39G8C.9   | 2.31  | 1.68  | 1.55 | 0.006178 |
| 1282 | ceh-45     | 5.67  | 5.03  | 1.55 | 0.007954 |
| 1283 | F53B6.4    | 4.79  | 4.15  | 1.55 | 0.008651 |
| 1284 | C27B7.6    | 4.15  | 3.51  | 1.55 | 0.009229 |
| 1285 | nucb-1     | 7.43  | 6.8   | 1.55 | 0.01298  |
| 1286 | toe-4      | 8.98  | 8.35  | 1.55 | 0.014974 |
| 1287 | T07D10.11  | 1.97  | 1.34  | 1.55 | 0.016911 |
| 1288 | E03H4.4    | 2.44  | 1.81  | 1.55 | 0.019095 |
| 1289 | olrn-1     | 7.15  | 6.52  | 1.55 | 0.020753 |
| 1290 | T14F9.18   | 3.51  | 2.88  | 1.55 | 0.021982 |
| 1291 | Y39H10A.4  | 5.07  | 4.44  | 1.55 | 0.032287 |

|             |            |       |       |      |          |
|-------------|------------|-------|-------|------|----------|
| <b>1292</b> | ccr-4      | 9.23  | 8.61  | 1.55 | 0.033485 |
| <b>1293</b> | prg-2      | 7.98  | 7.35  | 1.55 | 0.036542 |
| <b>1294</b> | cut-2      | 4.26  | 3.63  | 1.55 | 0.047642 |
| <b>1295</b> | pup-2      | 10.81 | 10.18 | 1.55 | 0.047728 |
| <b>1296</b> | egrh-1     | 8.39  | 7.76  | 1.55 | 0.048775 |
| <b>1297</b> | pes-7      | 6.95  | 6.32  | 1.55 | 0.049013 |
| <b>1298</b> | F20D6.8    | 5.83  | 5.2   | 1.55 | 0.04974  |
| <b>1299</b> | K10D11.6   | 4.35  | 3.73  | 1.54 | 0.00006  |
| <b>1300</b> | kin-2      | 8.83  | 8.21  | 1.54 | 0.000072 |
| <b>1301</b> | F38E9.5    | 8.56  | 7.93  | 1.54 | 0.001175 |
| <b>1302</b> | M117.4     | 3.63  | 3.01  | 1.54 | 0.002181 |
| <b>1303</b> | csnk-1     | 9.69  | 9.07  | 1.54 | 0.002481 |
| <b>1304</b> | F09G8.7    | 8.66  | 8.04  | 1.54 | 0.003027 |
| <b>1305</b> | Y43F4A.4   | 1.62  | 1     | 1.54 | 0.005061 |
| <b>1306</b> | npr-34     | 3.67  | 3.05  | 1.54 | 0.006552 |
| <b>1307</b> | F35H8.11   | 3.2   | 2.58  | 1.54 | 0.006598 |
| <b>1308</b> | Y53C10A.5  | 7.36  | 6.73  | 1.54 | 0.007227 |
| <b>1309</b> | ifa-1      | 6.65  | 6.04  | 1.54 | 0.007385 |
| <b>1310</b> | Y52B11A.19 | 6.99  | 6.38  | 1.54 | 0.011146 |
| <b>1311</b> | ced-1      | 8.17  | 7.54  | 1.54 | 0.011648 |
| <b>1312</b> | B0222.1    | 4.17  | 3.55  | 1.54 | 0.012717 |
| <b>1313</b> | C41D11.3   | 7.54  | 6.91  | 1.54 | 0.016574 |
| <b>1314</b> | peb-1      | 7.43  | 6.81  | 1.54 | 0.018122 |
| <b>1315</b> | hpo-11     | 9.41  | 8.79  | 1.54 | 0.020529 |
| <b>1316</b> | fbxa-202   | 1.78  | 1.16  | 1.54 | 0.020808 |
| <b>1317</b> | npr-15     | 4.65  | 4.02  | 1.54 | 0.02257  |
| <b>1318</b> | sax-3      | 7.66  | 7.04  | 1.54 | 0.026415 |
| <b>1319</b> | kcnl-4     | 3.28  | 2.65  | 1.54 | 0.026989 |
| <b>1320</b> | tank-1     | 7.11  | 6.49  | 1.54 | 0.029869 |
| <b>1321</b> | Y22F5A.8   | 3.4   | 2.78  | 1.54 | 0.030444 |
| <b>1322</b> | F26A10.2   | 8.1   | 7.47  | 1.54 | 0.031443 |
| <b>1323</b> | T09F5.12   | 6.96  | 6.33  | 1.54 | 0.039179 |
| <b>1324</b> | C29F5.3    | 2.91  | 2.29  | 1.54 | 0.041332 |
| <b>1325</b> | Y43F8C.6   | 6.59  | 5.97  | 1.54 | 0.049648 |
| <b>1326</b> | eps-8      | 8.52  | 7.9   | 1.53 | 0.000208 |

|      |            |       |       |      |          |
|------|------------|-------|-------|------|----------|
| 1327 | scd-1      | 8.57  | 7.96  | 1.53 | 0.000261 |
| 1328 | Y71H2AM.15 | 6.75  | 6.13  | 1.53 | 0.00042  |
| 1329 | klp-20     | 5.8   | 5.19  | 1.53 | 0.001931 |
| 1330 | tmc-1      | 5.95  | 5.34  | 1.53 | 0.002545 |
| 1331 | fbxa-155   | 2.81  | 2.2   | 1.53 | 0.01082  |
| 1332 | R07E3.4    | 4.99  | 4.39  | 1.53 | 0.012834 |
| 1333 | F35A5.1    | 6.18  | 5.56  | 1.53 | 0.013803 |
| 1334 | grl-8      | 5.42  | 4.8   | 1.53 | 0.01548  |
| 1335 | egl-4      | 8.08  | 7.46  | 1.53 | 0.0166   |
| 1336 | osm-3      | 4.1   | 3.48  | 1.53 | 0.017215 |
| 1337 | C56G2.15   | 6.88  | 6.27  | 1.53 | 0.020587 |
| 1338 | R12B2.9    | 3.77  | 3.15  | 1.53 | 0.022793 |
| 1339 | ZK867.6    | 4.98  | 4.37  | 1.53 | 0.023898 |
| 1340 | Y71A12B.29 | 2.82  | 2.21  | 1.53 | 0.030196 |
| 1341 | C14F11.4   | 6.89  | 6.28  | 1.53 | 0.032574 |
| 1342 | C24A11.2   | 2.62  | 2.01  | 1.53 | 0.03509  |
| 1343 | sea-1      | 5.57  | 4.95  | 1.53 | 0.035346 |
| 1344 | F44E5.14   | 6.11  | 5.5   | 1.53 | 0.040817 |
| 1345 | C55A6.14   | 3.91  | 3.29  | 1.53 | 0.042466 |
| 1346 | sfa-1      | 8.51  | 7.9   | 1.53 | 0.045339 |
| 1347 | btbd-10    | 9.86  | 9.25  | 1.53 | 0.048218 |
| 1348 | mig-6      | 8.01  | 7.4   | 1.52 | 0.00046  |
| 1349 | dod-6      | 11.98 | 11.38 | 1.52 | 0.001362 |
| 1350 | T23B7.3    | 8.2   | 7.6   | 1.52 | 0.001581 |
| 1351 | B0403.5    | 6.45  | 5.85  | 1.52 | 0.002067 |
| 1352 | W06H8.14   | 4.45  | 3.84  | 1.52 | 0.002732 |
| 1353 | vap-1      | 7.1   | 6.49  | 1.52 | 0.003375 |
| 1354 | C41G11.9   | 4.14  | 3.54  | 1.52 | 0.005041 |
| 1355 | elo-7      | 2.95  | 2.35  | 1.52 | 0.006461 |
| 1356 | ced-3      | 8.83  | 8.22  | 1.52 | 0.00788  |
| 1357 | piki-1     | 7.03  | 6.43  | 1.52 | 0.010524 |
| 1358 | Y105E8A.25 | 8.99  | 8.39  | 1.52 | 0.011454 |
| 1359 | ZC123.4    | 5.79  | 5.18  | 1.52 | 0.011769 |
| 1360 |            | 3.94  | 3.34  | 1.52 | 0.014655 |
| 1361 | K02B12.10  | 1.87  | 1.26  | 1.52 | 0.016699 |

|      |             |       |      |      |          |
|------|-------------|-------|------|------|----------|
| 1362 | C05G5.8     | 2.74  | 2.13 | 1.52 | 0.018951 |
| 1363 | cht1-1      | 6.58  | 5.97 | 1.52 | 0.01963  |
| 1364 | Y71G12B.23  | 6.38  | 5.77 | 1.52 | 0.022347 |
| 1365 | T25C12.6    | 6.11  | 5.51 | 1.52 | 0.025513 |
| 1366 | C31G12.4    | 2.56  | 1.95 | 1.52 | 0.030638 |
| 1367 | bcat-1      | 10.34 | 9.73 | 1.52 | 0.031981 |
| 1368 | pbrm-1      | 9.65  | 9.05 | 1.52 | 0.037369 |
| 1369 | cdt-1       | 8.57  | 7.96 | 1.52 | 0.040233 |
| 1370 | rme-1       | 8.75  | 8.15 | 1.52 | 0.045055 |
| 1371 | pxd-1       | 7.77  | 7.18 | 1.51 | 0.000053 |
| 1372 | lsy-2       | 6.66  | 6.06 | 1.51 | 0.00009  |
| 1373 | W06F12.2    | 7.69  | 7.1  | 1.51 | 0.000447 |
| 1374 | apl-1       | 10.18 | 9.58 | 1.51 | 0.000967 |
| 1375 | Y73F8A.1161 | 3.82  | 3.22 | 1.51 | 0.002842 |
| 1376 | Y39E4B.6    | 7.81  | 7.22 | 1.51 | 0.002876 |
| 1377 | nhr-23      | 7.89  | 7.29 | 1.51 | 0.003885 |
| 1378 | tln-1       | 7.77  | 7.18 | 1.51 | 0.004163 |
| 1379 | F10G8.11    | 4.57  | 3.98 | 1.51 | 0.005361 |
| 1380 | W01A11.20   | 2.59  | 1.99 | 1.51 | 0.005533 |
| 1381 | ccb-1       | 8.13  | 7.54 | 1.51 | 0.006601 |
| 1382 | ptb-1       | 7     | 6.41 | 1.51 | 0.007569 |
| 1383 | T28B11.1    | 10.32 | 9.72 | 1.51 | 0.013757 |
| 1384 | C44B12.10   | 2.63  | 2.03 | 1.51 | 0.014093 |
| 1385 | Y69H2.3     | 5.83  | 5.24 | 1.51 | 0.015291 |
| 1386 | bus-19      | 6.1   | 5.5  | 1.51 | 0.019085 |
| 1387 | spe-41      | 4.23  | 3.64 | 1.51 | 0.021017 |
| 1388 | grl-4       | 7.17  | 6.57 | 1.51 | 0.022603 |
| 1389 | dpy-28      | 7.7   | 7.1  | 1.51 | 0.02293  |
| 1390 | C01C4.3     | 7.61  | 7.01 | 1.51 | 0.023765 |
| 1391 | C07A9.15    | 4.19  | 3.6  | 1.51 | 0.027493 |
| 1392 | F22E12.9    | 3.54  | 2.94 | 1.51 | 0.027553 |
| 1393 | R106.1      | 5.41  | 4.82 | 1.51 | 0.027705 |
| 1394 | col-182     | 5.19  | 4.59 | 1.51 | 0.03044  |
| 1395 | W03A5.4     | 7.82  | 7.22 | 1.51 | 0.031372 |
| 1396 | xrn-2       | 6.93  | 6.33 | 1.51 | 0.031466 |

|             |          |      |      |      |          |
|-------------|----------|------|------|------|----------|
| <b>1397</b> | cgef-1   | 5.3  | 4.71 | 1.51 | 0.035715 |
| <b>1398</b> | F35D2.16 | 2.75 | 2.16 | 1.51 | 0.048423 |

---

**Table S3. The down-regulated differentially expressed genes in nematodes.**

| Number | Gene Symbol | SiNPs-weight         | Control-weight       | Fold   | ANOVA    |
|--------|-------------|----------------------|----------------------|--------|----------|
|        |             | Avg signal<br>(log2) | Avg signal<br>(log2) | Change | p-value  |
| 1      | C08F11.3    | 3.16                 | 6.23                 | -8.39  | 0.000225 |
| 2      | C33A12.19   | 3.91                 | 6.97                 | -8.37  | 0.021235 |
| 3      | mtl-1       | 7.29                 | 10.29                | -7.96  | 0.002452 |
| 4      | F40G12.5    | 2.82                 | 5.72                 | -7.5   | 0.003905 |
| 5      | hsp-12.3    | 4.41                 | 7.21                 | -6.95  | 0.002312 |
| 6      | F09C8.1     | 3.19                 | 5.96                 | -6.81  | 0.000965 |
| 7      | clec-61     | 4.75                 | 7.38                 | -6.2   | 0.001077 |
| 8      | W02D7.11    | 6.61                 | 9.16                 | -5.84  | 0.000719 |
| 9      | hsp-12.6    | 8.64                 | 11.16                | -5.72  | 0.000729 |
| 10     | gba-4       | 4.88                 | 7.39                 | -5.67  | 0.000563 |
| 11     | F47B8.4     | 2.99                 | 5.45                 | -5.51  | 0.000138 |
| 12     | fbxa-26     | 3.32                 | 5.76                 | -5.44  | 0.002659 |
| 13     | C49F5.7     | 6.08                 | 8.52                 | -5.43  | 0.005299 |
| 14     | cpr-2       | 7.41                 | 9.69                 | -4.88  | 0.000325 |
| 15     | F21C10.11   | 8.1                  | 10.38                | -4.86  | 0.002135 |
| 16     | ZK512.7     | 4.21                 | 6.46                 | -4.76  | 0.000349 |
| 17     | Y106G6D.5   | 5.16                 | 7.37                 | -4.64  | 0.005399 |
| 18     | K03H6.2     | 4.51                 | 6.68                 | -4.52  | 0.002681 |
| 19     | col-179     | 5.03                 | 7.2                  | -4.49  | 0.000009 |
| 20     | F12A10.1    | 3.13                 | 5.27                 | -4.41  | 0.025319 |
| 21     | C11E4.7     | 2.53                 | 4.65                 | -4.35  | 0.004754 |
| 22     | hil-1       | 7.22                 | 9.33                 | -4.34  | 0.000573 |
| 23     | asp-13      | 5.78                 | 7.86                 | -4.24  | 0.00036  |
| 24     | nhr-74      | 3.6                  | 5.67                 | -4.18  | 0.01916  |
| 25     | spp-1       | 8.19                 | 10.24                | -4.14  | 0.001413 |
| 26     | ZC395.5     | 5.42                 | 7.46                 | -4.11  | 0.000929 |
| 27     | F17B5.9     | 3.46                 | 5.48                 | -4.06  | 0.002904 |
| 28     | F01D5.14    | 5.65                 | 7.66                 | -4.05  | 0.025099 |
| 29     | Y37D8A.3    | 4.01                 | 6.02                 | -4.02  | 0.003905 |
| 30     | F43C11.7    | 7.42                 | 9.4                  | -3.93  | 0.000052 |
| 31     | Y40H7A.10   | 5.92                 | 7.9                  | -3.93  | 0.00054  |

|    |           |      |       |       |          |
|----|-----------|------|-------|-------|----------|
| 32 | far-5     | 2.3  | 4.23  | -3.81 | 0.007661 |
| 33 | btb-17    | 3.9  | 5.83  | -3.8  | 0.00017  |
| 34 | clcc-76   | 5.16 | 7.07  | -3.75 | 0.000436 |
| 35 | srp-2     | 5.19 | 7.07  | -3.7  | 0.008492 |
| 36 | fipr-13   | 2.69 | 4.57  | -3.68 | 0.012539 |
| 37 | T19B4.9   | 3.72 | 5.59  | -3.67 | 0.040634 |
| 38 | cyp-34A9  | 5.69 | 7.55  | -3.64 | 0.00058  |
| 39 | Y45F10C.2 | 7.43 | 9.3   | -3.64 | 0.009918 |
| 40 | Y51F10.7  | 8.01 | 9.86  | -3.62 | 0.000912 |
| 41 | F08G2.13  | 4.36 | 6.21  | -3.6  | 0.045435 |
| 42 | T11G6.3   | 3.89 | 5.7   | -3.52 | 0.00035  |
| 43 | fbxa-164  | 2.47 | 4.28  | -3.52 | 0.001046 |
| 44 | nspc-10   | 3.78 | 5.59  | -3.51 | 0.02122  |
| 45 | afmd-1    | 3.06 | 4.87  | -3.5  | 0.002087 |
| 46 | nhr-244   | 2.92 | 4.73  | -3.5  | 0.019391 |
| 47 | M163.12   | 6.59 | 8.38  | -3.46 | 0.023025 |
| 48 | asm-2     | 4.22 | 6.01  | -3.45 | 0.00009  |
| 49 | fbxa-6    | 3.85 | 5.63  | -3.45 | 0.001083 |
| 50 | dod-3     | 3.82 | 5.61  | -3.45 | 0.0086   |
| 51 | col-106   | 9.55 | 11.33 | -3.42 | 0.000816 |
| 52 | spp-2     | 4.74 | 6.49  | -3.37 | 0.002819 |
| 53 | F23D12.11 | 4.92 | 6.66  | -3.34 | 0.003216 |
| 54 | F37C12.10 | 3.3  | 5.04  | -3.34 | 0.003725 |
| 55 | K02F3.9   | 7.79 | 9.52  | -3.32 | 0.001393 |
| 56 | col-184   | 7.74 | 9.47  | -3.31 | 0.00095  |
| 57 | F36G9.7   | 2.23 | 3.95  | -3.3  | 0.000631 |
| 58 | C05D2.15  | 6.57 | 8.28  | -3.27 | 0.037638 |
| 59 | ttr-47    | 6.23 | 7.93  | -3.26 | 0.003545 |
| 60 | E02H4.7   | 5.59 | 7.28  | -3.24 | 0.00292  |
| 61 | clcc-172  | 4.03 | 5.72  | -3.23 | 0.006255 |
| 62 | nlp-28    | 2.9  | 4.59  | -3.23 | 0.008328 |
| 63 | Y6E2A.4   | 3.97 | 5.66  | -3.22 | 0.001021 |
| 64 | F54D5.3   | 8.18 | 9.87  | -3.22 | 0.001452 |
| 65 | ceeh-2    | 3.69 | 5.38  | -3.22 | 0.028955 |
| 66 | C18A3.14  | 6.96 | 8.65  | -3.22 | 0.035081 |

|     |            |      |      |       |          |
|-----|------------|------|------|-------|----------|
| 67  | C24B9.3    | 6.95 | 8.63 | -3.21 | 0.00002  |
| 68  | F26G1.10   | 2.02 | 3.7  | -3.21 | 0.002755 |
| 69  | F59A6.12   | 4.34 | 6.02 | -3.21 | 0.015976 |
| 70  | F16B4.7    | 5.45 | 7.13 | -3.2  | 0.011409 |
| 71  | cpi-1      | 8.09 | 9.76 | -3.18 | 0.004077 |
| 72  | Y43C5A.3   | 5.96 | 7.62 | -3.17 | 0.003919 |
| 73  | dhs-31     | 4.25 | 5.91 | -3.17 | 0.015482 |
| 74  | M60.4      | 9.04 | 10.7 | -3.16 | 0.000922 |
| 75  | clcc-209   | 6.48 | 8.13 | -3.15 | 0.002412 |
| 76  | clcc-209   | 6.48 | 8.13 | -3.15 | 0.002412 |
| 77  | Y23H5B.13  | 7.18 | 8.83 | -3.14 | 0.021798 |
| 78  | Y22D7AR.10 | 4.94 | 6.58 | -3.1  | 0.013064 |
| 79  | F59E11.7   | 3.11 | 4.74 | -3.09 | 0.033109 |
| 80  | R10H10.3   | 5.55 | 7.18 | -3.08 | 0.001382 |
| 81  | F09F7.6    | 6.91 | 8.52 | -3.05 | 0.000122 |
| 82  | F53G12.17  | 5.84 | 7.44 | -3.03 | 0.046454 |
| 83  | pud-2.2    | 7.75 | 9.35 | -3.02 | 0.000268 |
| 84  | pud-2.2    | 7.75 | 9.35 | -3.02 | 0.000268 |
| 85  | ttr-44     | 7.77 | 9.36 | -3.02 | 0.00145  |
| 86  | F30A10.14  | 2.82 | 4.41 | -3.02 | 0.008132 |
| 87  | T12B5.15   | 7.27 | 8.86 | -3.01 | 0.022212 |
| 88  | clcc-51    | 5.08 | 6.66 | -3    | 0.000875 |
| 89  | skr-5      | 4.18 | 5.76 | -3    | 0.009607 |
| 90  | pho-11     | 8.52 | 10.1 | -2.98 | 0.001037 |
| 91  | pud-1.2    | 8.18 | 9.75 | -2.97 | 0.000456 |
| 92  | clcc-145   | 4    | 5.57 | -2.96 | 0.002044 |
| 93  | nspc-16    | 6.41 | 7.98 | -2.96 | 0.018339 |
| 94  | pud-1.2    | 7.68 | 9.24 | -2.95 | 0.000381 |
| 95  | nspc-9     | 7.22 | 8.78 | -2.95 | 0.015357 |
| 96  | col-8      | 5.4  | 6.96 | -2.94 | 0.000207 |
| 97  | cdo-1      | 4.02 | 5.57 | -2.93 | 0.000724 |
| 98  | F36H9.4    | 5.22 | 6.77 | -2.93 | 0.002453 |
| 99  | ZK783.8    | 2.37 | 3.92 | -2.92 | 0.00436  |
| 100 | C11G10.1   | 4.47 | 6.02 | -2.92 | 0.033506 |
| 101 | ttr-42     | 4.7  | 6.24 | -2.91 | 0.010869 |



|     |            |      |       |       |          |
|-----|------------|------|-------|-------|----------|
| 102 | Y22D7AL.15 | 8.59 | 10.12 | -2.9  | 0.002592 |
| 103 | ttr-41     | 5.83 | 7.35  | -2.89 | 0.001401 |
| 104 | C44C1.6    | 5.38 | 6.91  | -2.89 | 0.007504 |
| 105 | spp-17     | 9.56 | 11.08 | -2.88 | 0.001892 |
| 106 | F40A3.2    | 4.54 | 6.06  | -2.88 | 0.003414 |
| 107 | spp-4      | 3.89 | 5.41  | -2.87 | 0.001924 |
| 108 | F14H3.12   | 5.04 | 6.56  | -2.87 | 0.004947 |
| 109 | T22D1.17   | 2.34 | 3.86  | -2.85 | 0.024396 |
| 110 | T19D7.6    | 4.8  | 6.31  | -2.84 | 0.002953 |
| 111 | K07E1.1    | 7.14 | 8.65  | -2.84 | 0.019481 |
| 112 | R07B5.11   | 2.06 | 3.56  | -2.83 | 0.016542 |
| 113 | dhs-7      | 1.42 | 2.92  | -2.82 | 0.0053   |
| 114 | dlhd-1     | 3.55 | 5.04  | -2.81 | 0.000175 |
| 115 | nspc-18    | 5.96 | 7.45  | -2.81 | 0.009238 |
| 116 | K02D10.8   | 5.23 | 6.72  | -2.8  | 0.000515 |
| 117 | far-7      | 6.42 | 7.9   | -2.8  | 0.001404 |
| 118 | ttr-25     | 6.07 | 7.55  | -2.79 | 0.006953 |
| 119 | F32A5.8    | 5.43 | 6.92  | -2.79 | 0.012915 |
| 120 | srp-1      | 6.35 | 7.82  | -2.78 | 0.00031  |
| 121 | poml-3     | 3.62 | 5.09  | -2.78 | 0.001532 |
| 122 | F49E12.10  | 4.27 | 5.74  | -2.78 | 0.002234 |
| 123 | irg-3      | 5.39 | 6.87  | -2.78 | 0.003162 |
| 124 | C54F6.6    | 4.25 | 5.72  | -2.77 | 0.03146  |
| 125 | M163.15    | 7.35 | 8.82  | -2.77 | 0.046395 |
| 126 | F22B7.9    | 6.21 | 7.67  | -2.76 | 0.000168 |
| 127 | col-101    | 3.32 | 4.78  | -2.76 | 0.001679 |
| 128 | D1054.8    | 3.88 | 5.34  | -2.76 | 0.001801 |
| 129 | W10G11.2   | 5.03 | 6.5   | -2.76 | 0.014374 |
| 130 | Y105C5A.8  | 5.97 | 7.42  | -2.74 | 0.001562 |
| 131 | K10G6.9    | 4.13 | 5.58  | -2.74 | 0.004564 |
| 132 | H39E23.2   | 3.11 | 4.56  | -2.73 | 0.008891 |
| 133 | best-14    | 4.76 | 6.21  | -2.73 | 0.01284  |
| 134 | W10G11.3   | 4.01 | 5.46  | -2.73 | 0.014001 |
| 135 | T10C6.15   | 4.55 | 5.99  | -2.73 | 0.025086 |
| 136 | F42F12.4   | 3.73 | 5.16  | -2.71 | 0.007037 |

|     |           |      |       |       |          |
|-----|-----------|------|-------|-------|----------|
| 137 | F20D6.5   | 4.06 | 5.5   | -2.71 | 0.011871 |
| 138 | sdz-24    | 7.27 | 8.7   | -2.7  | 0.000228 |
| 139 | ZK1320.3  | 8.16 | 9.59  | -2.7  | 0.000892 |
| 140 | spp-6     | 5.01 | 6.43  | -2.69 | 0.00256  |
| 141 | C15H11.11 | 4.35 | 5.77  | -2.69 | 0.002826 |
| 142 | ZK1320.2  | 7.45 | 8.87  | -2.68 | 0.00091  |
| 143 | tsp-10    | 4.31 | 5.73  | -2.68 | 0.006573 |
| 144 | zig-9     | 5.34 | 6.76  | -2.66 | 0.000209 |
| 145 | D1086.12  | 6.81 | 8.22  | -2.66 | 0.001916 |
| 146 | D2030.12  | 5.22 | 6.63  | -2.66 | 0.004234 |
| 147 | C08F11.12 | 5.33 | 6.74  | -2.66 | 0.015314 |
| 148 | col-80    | 5.71 | 7.13  | -2.66 | 0.021037 |
| 149 | ttr-46    | 7    | 8.4   | -2.65 | 0.004623 |
| 150 | K09C4.1   | 4.65 | 6.06  | -2.65 | 0.006501 |
| 151 | D1086.1   | 4.01 | 5.41  | -2.64 | 0.00139  |
| 152 | lys-4     | 5.36 | 6.76  | -2.64 | 0.002254 |
| 153 | gstk-2    | 3.24 | 4.64  | -2.64 | 0.005603 |
| 154 | cpin-1    | 3.53 | 4.93  | -2.64 | 0.010341 |
| 155 | fbxa-54   | 5.08 | 6.48  | -2.64 | 0.020899 |
| 156 | decr-1.1  | 3.72 | 5.12  | -2.64 | 0.02579  |
| 157 | F36D1.7   | 3.59 | 4.99  | -2.64 | 0.039108 |
| 158 | C08F11.11 | 8.39 | 9.79  | -2.64 | 0.045274 |
| 159 | F13D11.3  | 5.69 | 7.09  | -2.63 | 0.000687 |
| 160 | gta-1     | 7.6  | 8.99  | -2.63 | 0.005365 |
| 161 | C06G3.3   | 6.54 | 7.93  | -2.63 | 0.006129 |
| 162 | pud-4     | 4    | 5.4   | -2.63 | 0.007944 |
| 163 | spp-8     | 9.2  | 10.59 | -2.62 | 0.000227 |
| 164 | F22H10.6  | 4.02 | 5.41  | -2.62 | 0.000798 |
| 165 | fbxa-29   | 4.15 | 5.54  | -2.62 | 0.00118  |
| 166 | nspc-17   | 6.13 | 7.52  | -2.62 | 0.016742 |
| 167 | C23G10.11 | 7.93 | 9.32  | -2.62 | 0.017515 |
| 168 | H09I01.4  | 5.91 | 7.3   | -2.62 | 0.043381 |
| 169 | F53C11.9  | 3.92 | 5.31  | -2.61 | 0.003626 |
| 170 | dhs-14    | 5.68 | 7.06  | -2.6  | 0.000428 |
| 171 | C03G6.17  | 5.82 | 7.2   | -2.6  | 0.003272 |

|     |           |      |       |       |          |
|-----|-----------|------|-------|-------|----------|
| 172 | nspc-1    | 8.17 | 9.55  | -2.6  | 0.003471 |
| 173 | Y12A6A.1  | 4.88 | 6.26  | -2.6  | 0.004068 |
| 174 | F09E10.10 | 4.78 | 6.16  | -2.6  | 0.010202 |
| 175 | F21H7.12  | 3.15 | 4.53  | -2.6  | 0.013571 |
| 176 | T04A11.2  | 3.71 | 5.08  | -2.59 | 0.001295 |
| 177 | T04A11.2  | 3.71 | 5.08  | -2.59 | 0.001295 |
| 178 | T02B11.8  | 5.6  | 6.98  | -2.59 | 0.012313 |
| 179 | ttr-48    | 7.71 | 9.08  | -2.58 | 0.006256 |
| 180 | W01F3.2   | 6.56 | 7.92  | -2.57 | 0.008888 |
| 181 | ZK593.2   | 5.39 | 6.75  | -2.57 | 0.009193 |
| 182 | F47B10.5  | 4.87 | 6.23  | -2.56 | 0.001642 |
| 183 | F42F12.3  | 5.64 | 7     | -2.56 | 0.001804 |
| 184 | F54F7.3   | 5.62 | 6.98  | -2.56 | 0.008752 |
| 185 | gsto-1    | 2.71 | 4.06  | -2.56 | 0.00912  |
| 186 | srz-100   | 3.59 | 4.95  | -2.56 | 0.016204 |
| 187 | C03G6.5   | 5.9  | 7.25  | -2.55 | 0.000883 |
| 188 | lec-5     | 6.79 | 8.14  | -2.55 | 0.006522 |
| 189 | K07C5.17  | 4.22 | 5.56  | -2.54 | 0.007065 |
| 190 | gst-42    | 7.01 | 8.35  | -2.53 | 0.000317 |
| 191 | T19H5.6   | 3.86 | 5.2   | -2.53 | 0.001591 |
| 192 | Y39F10A.1 | 3.74 | 5.08  | -2.53 | 0.001795 |
| 193 | T05E7.1   | 3.7  | 5.04  | -2.53 | 0.001806 |
| 194 | F59C6.16  | 8.31 | 9.64  | -2.53 | 0.036801 |
| 195 | Y68A4A.13 | 8.93 | 10.26 | -2.52 | 0.004663 |
| 196 | clcc-75   | 4.5  | 5.82  | -2.51 | 0.000524 |
| 197 | T12D8.5   | 7.3  | 8.63  | -2.51 | 0.002482 |
| 198 | W09D12.1  | 6.28 | 7.61  | -2.51 | 0.004675 |
| 199 | K02A11.4  | 6.39 | 7.71  | -2.5  | 0.002262 |
| 200 | T23G11.11 | 5.54 | 6.87  | -2.5  | 0.01528  |
| 201 | F44G4.3   | 3.8  | 5.13  | -2.5  | 0.020929 |
| 202 | slc-36.5  | 4.91 | 6.23  | -2.49 | 0.001742 |
| 203 | spp-18    | 8.24 | 9.55  | -2.49 | 0.002482 |
| 204 | T26H5.8   | 4.61 | 5.92  | -2.49 | 0.002796 |
| 205 | F52D4.1   | 7.45 | 8.77  | -2.49 | 0.014873 |
| 206 | spp-14    | 8.92 | 10.23 | -2.48 | 0.000826 |

|     |           |      |      |       |          |
|-----|-----------|------|------|-------|----------|
| 207 | D1022.4   | 4.24 | 5.55 | -2.48 | 0.002462 |
| 208 | ZC239.16  | 6.38 | 7.69 | -2.48 | 0.005525 |
| 209 | F14F9.8   | 4.54 | 5.85 | -2.48 | 0.006826 |
| 210 | K07E3.4   | 6.16 | 7.47 | -2.47 | 0.000318 |
| 211 | T25B9.1   | 6.16 | 7.47 | -2.47 | 0.009338 |
| 212 | F41E6.5   | 5.19 | 6.49 | -2.46 | 0.000465 |
| 213 | F46G10.1  | 6.19 | 7.48 | -2.46 | 0.003812 |
| 214 | F35H8.2   | 3.2  | 4.49 | -2.46 | 0.007707 |
| 215 | lipl-2    | 7.02 | 8.31 | -2.45 | 0.000008 |
| 216 | T07G12.5  | 5.29 | 6.58 | -2.45 | 0.001184 |
| 217 | K07C11.3  | 4.83 | 6.12 | -2.45 | 0.005101 |
| 218 | kin-16    | 4.84 | 6.12 | -2.44 | 0.000283 |
| 219 | ins-35    | 4.3  | 5.59 | -2.44 | 0.001023 |
| 220 | klo-1     | 5.72 | 7.01 | -2.44 | 0.001172 |
| 221 | B0035.13  | 7.62 | 8.9  | -2.44 | 0.010188 |
| 222 | Y66H1A.5  | 6    | 7.28 | -2.43 | 0.001968 |
| 223 | math-37   | 3.65 | 4.93 | -2.43 | 0.022692 |
| 224 | K12H4.7   | 7.89 | 9.16 | -2.42 | 0.001085 |
| 225 | K12B6.9   | 5.42 | 6.69 | -2.42 | 0.007504 |
| 226 | tyr-3     | 1.56 | 2.83 | -2.42 | 0.009613 |
| 227 | gpx-7     | 1.86 | 3.13 | -2.42 | 0.009817 |
| 228 | cat-4     | 6.06 | 7.34 | -2.42 | 0.017262 |
| 229 | F26D11.12 | 4.13 | 5.4  | -2.41 | 0.002668 |
| 230 | acp-5     | 6.15 | 7.42 | -2.41 | 0.003712 |
| 231 | F32A5.9   | 4.3  | 5.57 | -2.41 | 0.015652 |
| 232 | F41G3.18  | 5.48 | 6.75 | -2.41 | 0.040316 |
| 233 | E04F6.9   | 7.17 | 8.43 | -2.4  | 0.00378  |
| 234 | Y42A5A.5  | 6.79 | 8.05 | -2.4  | 0.017794 |
| 235 | C31G12.1  | 3.43 | 4.69 | -2.4  | 0.038221 |
| 236 | F10G2.1   | 7.26 | 8.52 | -2.39 | 0.002249 |
| 237 | T08H10.1  | 8.28 | 9.53 | -2.39 | 0.002477 |
| 238 | tba-4     | 6.53 | 7.78 | -2.39 | 0.002929 |
| 239 | C01C10.2  | 6    | 7.26 | -2.39 | 0.00459  |
| 240 | C27A7.8   | 4.95 | 6.21 | -2.39 | 0.008972 |
| 241 | ttr-5     | 7.8  | 9.06 | -2.39 | 0.011948 |

|     |             |      |       |       |          |
|-----|-------------|------|-------|-------|----------|
| 242 | Y34B4A.5    | 4.69 | 5.93  | -2.38 | 0.00566  |
| 243 | M04D5.3     | 4.17 | 5.42  | -2.38 | 0.017346 |
| 244 | col-129     | 7.26 | 8.52  | -2.38 | 0.017629 |
| 245 | F54F7.2     | 2.4  | 3.65  | -2.38 | 0.02576  |
| 246 | C46G7.1     | 9.14 | 10.38 | -2.37 | 0.000685 |
| 247 | hex-1       | 7.46 | 8.7   | -2.37 | 0.012304 |
| 248 | R10E9.3     | 4.08 | 5.32  | -2.37 | 0.046191 |
| 249 | C35C5.9     | 7.39 | 8.63  | -2.36 | 0.000995 |
| 250 | R09H10.3    | 4.92 | 6.16  | -2.36 | 0.009506 |
| 251 | K03B8.8     | 3.71 | 4.95  | -2.35 | 0.000244 |
| 252 | lgc-32      | 4.47 | 5.7   | -2.35 | 0.002063 |
| 253 | F23D12.7    | 8.57 | 9.8   | -2.35 | 0.006827 |
| 254 | C08E8.4     | 3.41 | 4.64  | -2.35 | 0.007186 |
| 255 | pepm-1      | 1.55 | 2.78  | -2.35 | 0.007308 |
| 256 | cpg-9       | 3.65 | 4.88  | -2.35 | 0.034412 |
| 257 | col-19      | 9.4  | 10.62 | -2.34 | 0.001439 |
| 258 | H32K16.2    | 6.33 | 7.56  | -2.34 | 0.003811 |
| 259 | Y40C5A.4    | 6.71 | 7.94  | -2.34 | 0.004535 |
| 260 | F31E9.11    | 4.54 | 5.76  | -2.34 | 0.005826 |
| 261 | F49C12.7    | 4.98 | 6.21  | -2.34 | 0.014757 |
| 262 | W01D2.8     | 7.32 | 8.55  | -2.34 | 0.040051 |
| 263 | K09H9.5     | 5.54 | 6.76  | -2.33 | 0.007094 |
| 264 | Y39G10AR.26 | 4    | 5.22  | -2.33 | 0.040273 |
| 265 | C18A11.1    | 5.19 | 6.41  | -2.33 | 0.043527 |
| 266 | C16E9.1     | 4.03 | 5.25  | -2.32 | 0.00202  |
| 267 | clcc-146    | 6.26 | 7.48  | -2.32 | 0.004675 |
| 268 | ttr-24      | 6.24 | 7.45  | -2.32 | 0.005753 |
| 269 | abf-2       | 4.45 | 5.67  | -2.32 | 0.032707 |
| 270 | F13G11.3    | 6.91 | 8.12  | -2.32 | 0.036753 |
| 271 | F45B8.6     | 4.31 | 5.52  | -2.32 | 0.041206 |
| 272 | B0361.9     | 5.53 | 6.74  | -2.31 | 0.000184 |
| 273 | ech-7       | 8.12 | 9.33  | -2.31 | 0.002602 |
| 274 | W02D7.8     | 3.14 | 4.34  | -2.31 | 0.012364 |
| 275 | Y53F4B.58   | 7.81 | 9.02  | -2.31 | 0.03349  |
| 276 | T13F3.6     | 3.63 | 4.83  | -2.3  | 0.000043 |

|     |            |      |      |       |          |
|-----|------------|------|------|-------|----------|
| 277 | F23F1.7    | 3.95 | 5.15 | -2.3  | 0.005406 |
| 278 | ugt-5      | 3.78 | 4.98 | -2.3  | 0.009656 |
| 279 | W03D2.13   | 7.12 | 8.32 | -2.29 | 0.000216 |
| 280 | T04F8.8    | 8.35 | 9.54 | -2.29 | 0.000722 |
| 281 | btb-20     | 5.44 | 6.64 | -2.29 | 0.003293 |
| 282 | Y73F4A.1   | 5.76 | 6.95 | -2.29 | 0.004178 |
| 283 | C14A4.7    | 3.57 | 4.77 | -2.29 | 0.006201 |
| 284 | spp-16     | 4.91 | 6.11 | -2.29 | 0.007106 |
| 285 | T10B11.5   | 4.11 | 5.31 | -2.29 | 0.008396 |
| 286 | F14B8.4    | 5.36 | 6.56 | -2.29 | 0.008735 |
| 287 | F26E4.14   | 8.37 | 9.56 | -2.29 | 0.026041 |
| 288 | pud-3      | 2.09 | 3.29 | -2.29 | 0.031074 |
| 289 | F31E3.12   | 4.45 | 5.65 | -2.29 | 0.036279 |
| 290 | F42G2.5    | 4.49 | 5.68 | -2.28 | 0.000137 |
| 291 | DH11.2     | 5.44 | 6.63 | -2.28 | 0.0014   |
| 292 | moc-2      | 7.54 | 8.73 | -2.28 | 0.002763 |
| 293 | ttr-49     | 4.16 | 5.35 | -2.28 | 0.003856 |
| 294 | Y110A7A.21 | 5.77 | 6.96 | -2.28 | 0.005687 |
| 295 | hgo-1      | 7.05 | 8.24 | -2.28 | 0.010334 |
| 296 | Y116A8C.3  | 4.43 | 5.62 | -2.28 | 0.010808 |
| 297 | C44B11.6   | 5.47 | 6.66 | -2.28 | 0.018301 |
| 298 | nspc-19    | 5.48 | 6.67 | -2.28 | 0.036774 |
| 299 | C29F9.3    | 6.19 | 7.37 | -2.27 | 0.000034 |
| 300 | Y7A5A.1    | 5.38 | 6.56 | -2.27 | 0.000156 |
| 301 | ZC262.5    | 7.31 | 8.49 | -2.27 | 0.001171 |
| 302 | ZC262.5    | 7.31 | 8.49 | -2.27 | 0.001171 |
| 303 | mce-1      | 6.99 | 8.17 | -2.27 | 0.007174 |
| 304 | C02F5.14   | 5.06 | 6.24 | -2.27 | 0.03736  |
| 305 | ceeh-1     | 5.8  | 6.97 | -2.25 | 0.000343 |
| 306 | swt-3      | 6.41 | 7.57 | -2.25 | 0.001554 |
| 307 | F41E6.15   | 4.09 | 5.26 | -2.25 | 0.003168 |
| 308 | aqp-1      | 8.22 | 9.39 | -2.25 | 0.01308  |
| 309 | M7.8       | 2.68 | 3.85 | -2.24 | 0.004751 |
| 310 | ZK856.5    | 4.46 | 5.63 | -2.24 | 0.023576 |
| 311 | F30A10.11  | 2.3  | 3.46 | -2.24 | 0.042829 |

|     |            |       |       |       |          |
|-----|------------|-------|-------|-------|----------|
| 312 | AC3.5      | 4.72  | 5.87  | -2.23 | 0.000101 |
| 313 | K01A12.4   | 9.76  | 10.91 | -2.23 | 0.00062  |
| 314 | cpg-7      | 5.44  | 6.6   | -2.23 | 0.00305  |
| 315 | K06A4.7    | 9.53  | 10.69 | -2.23 | 0.008593 |
| 316 | chpf-1     | 6.99  | 8.15  | -2.23 | 0.011595 |
| 317 | dpm-3      | 6.4   | 7.56  | -2.23 | 0.02189  |
| 318 | mtl-2      | 7.15  | 8.3   | -2.23 | 0.024608 |
| 319 | ttr-40     | 3.69  | 4.84  | -2.23 | 0.042221 |
| 320 | W02D7.4    | 4.29  | 5.44  | -2.22 | 0.001231 |
| 321 | amx-3      | 3.57  | 4.72  | -2.22 | 0.002413 |
| 322 | F17E9.2    | 2.85  | 4.01  | -2.22 | 0.005797 |
| 323 | D1086.2    | 3.71  | 4.86  | -2.22 | 0.007679 |
| 324 | T19E7.6    | 7.64  | 8.79  | -2.22 | 0.019405 |
| 325 | nlp-27     | 1.31  | 2.47  | -2.22 | 0.03391  |
| 326 | F31D4.9    | 9.26  | 10.41 | -2.22 | 0.040574 |
| 327 | nhr-94     | 3.39  | 4.54  | -2.22 | 0.046964 |
| 328 | fbxa-197   | 4.05  | 5.2   | -2.21 | 0.002283 |
| 329 | C05C12.4   | 6.9   | 8.04  | -2.21 | 0.002837 |
| 330 | F35B12.10  | 6.9   | 8.04  | -2.21 | 0.006332 |
| 331 | F48G7.10   | 4.25  | 5.39  | -2.21 | 0.00697  |
| 332 | C14B9.10   | 8.43  | 9.57  | -2.21 | 0.009152 |
| 333 | R13H4.2    | 4.89  | 6.03  | -2.21 | 0.009786 |
| 334 | ucr-11     | 8.46  | 9.61  | -2.21 | 0.011905 |
| 335 | C18A3.10   | 4.3   | 5.44  | -2.21 | 0.01359  |
| 336 | mrps-17    | 5.87  | 7.02  | -2.21 | 0.031067 |
| 337 | Y71G12B.32 | 3.12  | 4.26  | -2.21 | 0.038915 |
| 338 | chpf-2     | 5.67  | 6.82  | -2.21 | 0.043982 |
| 339 | trx-2      | 8.06  | 9.2   | -2.2  | 0.002935 |
| 340 | Y62H9A.15  | 3.95  | 5.09  | -2.2  | 0.007811 |
| 341 | H14A12.5   | 5.54  | 6.68  | -2.2  | 0.008941 |
| 342 | C02F12.5   | 2.74  | 3.88  | -2.2  | 0.011409 |
| 343 | unc-27     | 10.29 | 11.41 | -2.18 | 0.000447 |
| 344 | gst-22     | 6.43  | 7.56  | -2.18 | 0.00144  |
| 345 | K10C2.14   | 3.08  | 4.2   | -2.18 | 0.001537 |
| 346 | Y50E8A.1   | 6.18  | 7.3   | -2.18 | 0.002492 |

|     |            |      |       |       |          |
|-----|------------|------|-------|-------|----------|
| 347 | ZK909.6    | 4.56 | 5.68  | -2.18 | 0.006529 |
| 348 | K07A1.6    | 6.58 | 7.71  | -2.18 | 0.011979 |
| 349 | F19G12.9   | 6.99 | 8.11  | -2.18 | 0.018463 |
| 350 | T21F4.1    | 7.21 | 8.33  | -2.18 | 0.019564 |
| 351 | dph-3      | 7.05 | 8.17  | -2.18 | 0.027727 |
| 352 | C53C11.2   | 3.74 | 4.86  | -2.18 | 0.045226 |
| 353 | spp-15     | 8.68 | 9.79  | -2.17 | 0.021318 |
| 354 | F43G6.17   | 4.62 | 5.72  | -2.16 | 0.00215  |
| 355 | gcst-1     | 8.29 | 9.4   | -2.16 | 0.004552 |
| 356 | asg-2      | 8.16 | 9.27  | -2.16 | 0.005417 |
| 357 | C36B1.6    | 3.68 | 4.79  | -2.16 | 0.02074  |
| 358 | F56A12.5   | 6.05 | 7.16  | -2.16 | 0.040467 |
| 359 | T05C12.15  | 5.1  | 6.22  | -2.16 | 0.047844 |
| 360 | fbxc-1     | 5.36 | 6.47  | -2.15 | 0.000905 |
| 361 | fbxc-2     | 5.36 | 6.47  | -2.15 | 0.000905 |
| 362 | fbxc-2     | 5.36 | 6.47  | -2.15 | 0.000905 |
| 363 | fbxc-1     | 5.36 | 6.47  | -2.15 | 0.000905 |
| 364 | T10B5.7    | 8.24 | 9.34  | -2.15 | 0.001289 |
| 365 | Y34F4.1    | 5.21 | 6.32  | -2.15 | 0.007237 |
| 366 | ugt-39     | 3.54 | 4.65  | -2.15 | 0.011319 |
| 367 | dhs-2      | 3.78 | 4.89  | -2.15 | 0.016485 |
| 368 | C41C4.15   | 5.89 | 7     | -2.15 | 0.020517 |
| 369 | ZK1127.5   | 6.29 | 7.39  | -2.15 | 0.021107 |
| 370 | T05G5.4    | 2.03 | 3.13  | -2.15 | 0.023091 |
| 371 | math-24    | 3.92 | 5.02  | -2.14 | 0.005981 |
| 372 | M01B2.13   | 4.05 | 5.15  | -2.14 | 0.008202 |
| 373 | Y82E9BR.22 | 6.92 | 8.01  | -2.14 | 0.011746 |
| 374 | C30G7.4    | 3.92 | 5.02  | -2.14 | 0.024664 |
| 375 | btb-4      | 5.04 | 6.14  | -2.14 | 0.036623 |
| 376 | cpn-3      | 9.42 | 10.51 | -2.13 | 0.000867 |
| 377 | T05C3.6    | 4.19 | 5.28  | -2.13 | 0.002618 |
| 378 | Y40C5A.4   | 5.55 | 6.64  | -2.13 | 0.002683 |
| 379 | LLC1.2     | 6.43 | 7.52  | -2.13 | 0.003672 |
| 380 | C50F4.4    | 5.32 | 6.42  | -2.13 | 0.011216 |
| 381 | T20D3.2    | 7.72 | 8.81  | -2.13 | 0.015745 |



|     |            |      |       |       |          |
|-----|------------|------|-------|-------|----------|
| 382 | lys-2      | 2.02 | 3.11  | -2.13 | 0.017342 |
| 383 | F45D3.3    | 7.4  | 8.49  | -2.13 | 0.024685 |
| 384 | fil-2      | 3.87 | 4.96  | -2.13 | 0.025865 |
| 385 | F28B4.4    | 3.8  | 4.89  | -2.13 | 0.042611 |
| 386 | Y48G1C.13  | 4.31 | 5.4   | -2.13 | 0.046707 |
| 387 | H36L18.2   | 9.28 | 10.37 | -2.12 | 0.003842 |
| 388 | clec-47    | 3.85 | 4.94  | -2.12 | 0.004586 |
| 389 | fbxa-64    | 6.15 | 7.23  | -2.12 | 0.005567 |
| 390 | clec-222   | 5.39 | 6.47  | -2.12 | 0.013714 |
| 391 | T04A11.1   | 4.15 | 5.23  | -2.11 | 0.002054 |
| 392 | T04A11.1   | 4.15 | 5.23  | -2.11 | 0.002054 |
| 393 | T13G4.4    | 4.96 | 6.04  | -2.11 | 0.002397 |
| 394 | ugt-18     | 6.38 | 7.45  | -2.11 | 0.002987 |
| 395 | K02A11.3   | 5.88 | 6.96  | -2.11 | 0.005397 |
| 396 | R06C1.4    | 9.78 | 10.85 | -2.11 | 0.02396  |
| 397 | Y54F10AM.8 | 7.12 | 8.19  | -2.1  | 0.000383 |
| 398 | Y42G9A.1   | 6.46 | 7.53  | -2.1  | 0.000536 |
| 399 | C15A11.7   | 3.71 | 4.78  | -2.1  | 0.001752 |
| 400 | R11D1.3    | 4.57 | 5.64  | -2.1  | 0.001797 |
| 401 | Y50D4A.5   | 4.82 | 5.89  | -2.1  | 0.003314 |
| 402 | T04G9.7    | 9.08 | 10.15 | -2.1  | 0.00332  |
| 403 | Y105C5A.13 | 6.51 | 7.58  | -2.1  | 0.006104 |
| 404 | gcsH-1     | 5.28 | 6.35  | -2.1  | 0.011547 |
| 405 | Y106G6E.4  | 6    | 7.07  | -2.1  | 0.015212 |
| 406 | lbp-2      | 7.48 | 8.56  | -2.1  | 0.021464 |
| 407 | R07E4.3    | 6.57 | 7.64  | -2.1  | 0.02217  |
| 408 | T09B4.4    | 4.61 | 5.68  | -2.1  | 0.03138  |
| 409 | gst-41     | 2.23 | 3.3   | -2.1  | 0.041809 |
| 410 | W06G6.20   | 3.63 | 4.69  | -2.09 | 0.002995 |
| 411 | Y105C5B.9  | 6.07 | 7.13  | -2.09 | 0.010493 |
| 412 | Y45F10D.6  | 4.76 | 5.82  | -2.09 | 0.010523 |
| 413 | F53F4.13   | 7.09 | 8.15  | -2.09 | 0.012848 |
| 414 | F29C6.1    | 5.02 | 6.09  | -2.09 | 0.0279   |
| 415 | C41G11.1   | 5.9  | 6.96  | -2.09 | 0.033721 |
| 416 | F30A10.13  | 6.32 | 7.38  | -2.09 | 0.037001 |

|     |           |      |       |       |          |
|-----|-----------|------|-------|-------|----------|
| 417 | nhr-92    | 5.69 | 6.74  | -2.08 | 0.001429 |
| 418 | T20D4.11  | 4.91 | 5.97  | -2.08 | 0.002095 |
| 419 | F45D11.14 | 6.96 | 8.02  | -2.08 | 0.002878 |
| 420 | F45D11.14 | 6.96 | 8.02  | -2.08 | 0.002878 |
| 421 | F45D11.14 | 6.96 | 8.02  | -2.08 | 0.002878 |
| 422 | pat-10    | 9.06 | 10.11 | -2.08 | 0.005609 |
| 423 | C49H3.12  | 6    | 7.06  | -2.08 | 0.006844 |
| 424 | F25B4.8   | 3.9  | 4.96  | -2.08 | 0.011599 |
| 425 | ttr-51    | 8    | 9.05  | -2.08 | 0.012879 |
| 426 | F37C12.3  | 7.73 | 8.79  | -2.08 | 0.016795 |
| 427 | tin-9.1   | 6.55 | 7.61  | -2.08 | 0.023638 |
| 428 | col-98    | 5.28 | 6.34  | -2.08 | 0.036822 |
| 429 | M03D4.3   | 6.34 | 7.39  | -2.07 | 0.004105 |
| 430 | K09A9.8   | 3.24 | 4.29  | -2.07 | 0.005158 |
| 431 | ZK856.7   | 6.35 | 7.4   | -2.07 | 0.005496 |
| 432 | W10D9.3   | 3.59 | 4.64  | -2.07 | 0.008312 |
| 433 | F19F10.3  | 6.9  | 7.95  | -2.07 | 0.009851 |
| 434 | C53H9.3   | 5.36 | 6.41  | -2.07 | 0.015669 |
| 435 | tin-13    | 8.78 | 9.83  | -2.07 | 0.017922 |
| 436 | clcc-70   | 1.92 | 2.97  | -2.07 | 0.021346 |
| 437 | nspc-12   | 8.71 | 9.75  | -2.07 | 0.024236 |
| 438 | mlt-3     | 4.44 | 5.49  | -2.07 | 0.026752 |
| 439 | gst-30    | 3.06 | 4.11  | -2.07 | 0.041779 |
| 440 | T28C6.8   | 6.09 | 7.14  | -2.07 | 0.043907 |
| 441 | C49A9.1   | 2.48 | 3.52  | -2.06 | 0.001123 |
| 442 | gsnl-1    | 4.97 | 6.01  | -2.06 | 0.001456 |
| 443 | fbxa-189  | 4.24 | 5.28  | -2.06 | 0.004273 |
| 444 | M142.8    | 6.91 | 7.95  | -2.06 | 0.005166 |
| 445 | Y38H6C.21 | 2.2  | 3.24  | -2.06 | 0.005338 |
| 446 | T26H5.4   | 5.4  | 6.44  | -2.06 | 0.005344 |
| 447 | clcc-218  | 2.64 | 3.69  | -2.06 | 0.009651 |
| 448 | ZK809.8   | 7.97 | 9.01  | -2.06 | 0.010063 |
| 449 | F53A3.7   | 5.8  | 6.84  | -2.06 | 0.011162 |
| 450 | rpac-19   | 6.2  | 7.25  | -2.06 | 0.025164 |
| 451 | T23E7.6   | 8.18 | 9.22  | -2.06 | 0.028509 |

|     |           |      |      |       |          |
|-----|-----------|------|------|-------|----------|
| 452 | C46A5.13  | 2.58 | 3.62 | -2.06 | 0.035024 |
| 453 | C04E12.4  | 3.34 | 4.38 | -2.06 | 0.042529 |
| 454 | erg-28    | 5.15 | 6.2  | -2.06 | 0.047787 |
| 455 | sek-4     | 4.41 | 5.45 | -2.05 | 0.005101 |
| 456 | C14A4.6   | 5.97 | 7.01 | -2.05 | 0.010639 |
| 457 | ZK563.7   | 3.2  | 4.23 | -2.05 | 0.014725 |
| 458 | bath-26   | 2.86 | 3.9  | -2.05 | 0.016105 |
| 459 | clcc-52   | 6.59 | 7.62 | -2.05 | 0.027715 |
| 460 | rhr-1     | 7.62 | 8.66 | -2.05 | 0.038232 |
| 461 | T04F3.4   | 2.85 | 3.89 | -2.05 | 0.039255 |
| 462 | T01C8.2   | 4.33 | 5.36 | -2.05 | 0.042521 |
| 463 | C50H2.13  | 4.45 | 5.48 | -2.04 | 0.002388 |
| 464 | clcc-85   | 7.7  | 8.73 | -2.04 | 0.004157 |
| 465 | C05B5.8   | 5.08 | 6.11 | -2.04 | 0.005955 |
| 466 | C35D10.17 | 7.2  | 8.23 | -2.04 | 0.006386 |
| 467 | F47B8.8   | 7.05 | 8.08 | -2.04 | 0.006533 |
| 468 | ttr-15    | 8.08 | 9.1  | -2.04 | 0.008337 |
| 469 | ZK512.4   | 7.45 | 8.47 | -2.04 | 0.011439 |
| 470 | B0454.5   | 3.23 | 4.26 | -2.04 | 0.011921 |
| 471 | F21C10.10 | 8.73 | 9.76 | -2.04 | 0.012075 |
| 472 | F01G4.5   | 6.03 | 7.06 | -2.04 | 0.022052 |
| 473 | pin-2     | 4.66 | 5.69 | -2.04 | 0.02437  |
| 474 | mdt-31    | 7.1  | 8.13 | -2.04 | 0.027086 |
| 475 | srz-99    | 3.89 | 4.92 | -2.04 | 0.038645 |
| 476 | ttr-59    | 4.68 | 5.71 | -2.04 | 0.040406 |
| 477 | hlh-13    | 2.93 | 3.95 | -2.03 | 0.000307 |
| 478 | C34F6.11  | 3.87 | 4.89 | -2.03 | 0.000911 |
| 479 | F45F2.9   | 6.31 | 7.33 | -2.03 | 0.003399 |
| 480 | nlp-40    | 7.57 | 8.58 | -2.03 | 0.007858 |
| 481 | C47E12.12 | 3.01 | 4.03 | -2.03 | 0.008246 |
| 482 | K08C7.7   | 3.02 | 4.04 | -2.03 | 0.029982 |
| 483 | gst-3     | 4.41 | 5.43 | -2.02 | 0.000487 |
| 484 | clcc-82   | 4.93 | 5.95 | -2.02 | 0.001258 |
| 485 | C08B6.10  | 4.44 | 5.46 | -2.02 | 0.001339 |
| 486 | nas-9     | 5.79 | 6.81 | -2.02 | 0.002429 |

|     |           |      |      |       |          |
|-----|-----------|------|------|-------|----------|
| 487 | Y49E10.18 | 7.64 | 8.66 | -2.02 | 0.002669 |
| 488 | C52E2.5   | 3.71 | 4.73 | -2.02 | 0.003435 |
| 489 | Y47G6A.33 | 5.04 | 6.05 | -2.02 | 0.006183 |
| 490 | fbxa-208  | 5.21 | 6.22 | -2.02 | 0.007311 |
| 491 | C39B5.5   | 3.49 | 4.5  | -2.02 | 0.010498 |
| 492 | flp-34    | 6.63 | 7.64 | -2.02 | 0.011249 |
| 493 | F10E9.11  | 5.42 | 6.43 | -2.02 | 0.038395 |
| 494 | Y51B9A.9  | 4.68 | 5.69 | -2.01 | 0.000217 |
| 495 | nnt-1     | 5.57 | 6.58 | -2.01 | 0.000891 |
| 496 | C39D10.3  | 5.58 | 6.58 | -2.01 | 0.001296 |
| 497 | smf-3     | 4.85 | 5.85 | -2.01 | 0.002105 |
| 498 | T26E3.4   | 7.6  | 8.61 | -2.01 | 0.003207 |
| 499 | F45G2.10  | 6.94 | 7.95 | -2.01 | 0.009135 |
| 500 | W02D9.6   | 8.73 | 9.74 | -2.01 | 0.009155 |
| 501 | K07A1.13  | 4.84 | 5.85 | -2.01 | 0.01068  |
| 502 | C17E4.11  | 5.78 | 6.79 | -2.01 | 0.016727 |
| 503 | T12D8.10  | 7.81 | 8.81 | -2.01 | 0.017256 |
| 504 | Y34B4A.9  | 7.39 | 8.39 | -2.01 | 0.017776 |
| 505 | tsen-2    | 5.41 | 6.42 | -2.01 | 0.018956 |
| 506 | psmd-9    | 5.41 | 6.42 | -2.01 | 0.023369 |
| 507 | E02H1.6   | 5.93 | 6.94 | -2.01 | 0.029029 |
| 508 | Y54E5A.8  | 7.94 | 8.93 | -2    | 0.003504 |
| 509 | F42A10.6  | 6.73 | 7.73 | -2    | 0.008546 |
| 510 | K07A12.8  | 4.11 | 5.11 | -2    | 0.01336  |
| 511 | ZK616.2   | 6.95 | 7.95 | -2    | 0.015527 |
| 512 | F41C3.5   | 7.57 | 8.57 | -2    | 0.015843 |
| 513 | W05B2.10  | 7.5  | 8.5  | -2    | 0.016394 |
| 514 | K07A1.3   | 4.23 | 5.23 | -2    | 0.019059 |
| 515 | cyn-11    | 6.85 | 7.85 | -2    | 0.021074 |
| 516 | ech-9     | 4.18 | 5.17 | -2    | 0.026495 |
| 517 | C54D1.7   | 4.77 | 5.76 | -1.99 | 0.000472 |
| 518 | H11E01.2  | 3.78 | 4.77 | -1.99 | 0.004918 |
| 519 | T10F2.5   | 6.37 | 7.37 | -1.99 | 0.009281 |
| 520 | frt-1     | 5.66 | 6.66 | -1.99 | 0.009315 |
| 521 | tag-280   | 5.26 | 6.26 | -1.99 | 0.014253 |

|     |            |      |       |       |          |
|-----|------------|------|-------|-------|----------|
| 522 | F47E1.4    | 3.98 | 4.97  | -1.99 | 0.017536 |
| 523 | F14H8.10   | 5.04 | 6.03  | -1.99 | 0.02067  |
| 524 | Y39B6A.5   | 8.88 | 9.88  | -1.99 | 0.023888 |
| 525 | Y45F10C.4  | 5.85 | 6.85  | -1.99 | 0.046268 |
| 526 | ech-8      | 4.61 | 5.6   | -1.98 | 0.000162 |
| 527 | F35C8.5    | 9.26 | 10.24 | -1.98 | 0.001091 |
| 528 | F46B6.12   | 7.75 | 8.73  | -1.98 | 0.003602 |
| 529 | R01H2.7    | 4.33 | 5.32  | -1.98 | 0.007324 |
| 530 | Y51A2D.18  | 4.84 | 5.83  | -1.98 | 0.010098 |
| 531 | ZK1290.13  | 6.63 | 7.62  | -1.98 | 0.015135 |
| 532 | Y39B6A.3   | 6.55 | 7.54  | -1.98 | 0.015222 |
| 533 | Y66D12A.21 | 8.2  | 9.19  | -1.98 | 0.019142 |
| 534 | K01C8.1    | 7.76 | 8.75  | -1.98 | 0.019356 |
| 535 | cyp-33E1   | 5.53 | 6.51  | -1.97 | 0.001339 |
| 536 | F22D6.9    | 5.05 | 6.03  | -1.97 | 0.001912 |
| 537 | haf-9      | 6.49 | 7.47  | -1.97 | 0.002556 |
| 538 | C15B12.1   | 4.83 | 5.81  | -1.97 | 0.002578 |
| 539 | twk-5      | 5.08 | 6.06  | -1.97 | 0.004111 |
| 540 | nhr-18     | 6.61 | 7.59  | -1.97 | 0.004632 |
| 541 | dhs-15     | 4.43 | 5.41  | -1.97 | 0.007305 |
| 542 | nepr-1     | 7.83 | 8.81  | -1.97 | 0.00919  |
| 543 | clec-80    | 4.37 | 5.35  | -1.97 | 0.012699 |
| 544 | lys-7      | 5.62 | 6.6   | -1.97 | 0.015473 |
| 545 | D1007.4    | 5.86 | 6.84  | -1.97 | 0.022524 |
| 546 | K06A4.10   | 3.72 | 4.7   | -1.97 | 0.022649 |
| 547 | Y82E9BR.4  | 2.34 | 3.31  | -1.97 | 0.027555 |
| 548 | K10C2.8    | 4.65 | 5.63  | -1.97 | 0.032726 |
| 549 | Y54G9A.9   | 5.55 | 6.53  | -1.97 | 0.034128 |
| 550 | ZC204.12   | 7.68 | 8.65  | -1.96 | 0.00012  |
| 551 | ftn-1      | 4.61 | 5.58  | -1.96 | 0.000521 |
| 552 | daao-1     | 3.32 | 4.29  | -1.96 | 0.000893 |
| 553 | D1086.8    | 4.53 | 5.5   | -1.96 | 0.001036 |
| 554 | alh-1      | 9.66 | 10.63 | -1.96 | 0.002656 |
| 555 | nduf-5     | 7.79 | 8.76  | -1.96 | 0.003039 |
| 556 | apm-1      | 8.38 | 9.35  | -1.96 | 0.005274 |

|     |            |      |      |       |          |
|-----|------------|------|------|-------|----------|
| 557 | ZC449.4    | 7.46 | 8.43 | -1.96 | 0.0065   |
| 558 | C43F9.7    | 6.32 | 7.29 | -1.96 | 0.01575  |
| 559 | mdt-22     | 7.88 | 8.85 | -1.96 | 0.017501 |
| 560 | F35D11.4   | 4.32 | 5.29 | -1.96 | 0.02442  |
| 561 | F33G12.7   | 6.52 | 7.49 | -1.96 | 0.027972 |
| 562 | mrpl-36    | 8.27 | 9.24 | -1.96 | 0.031009 |
| 563 | C15C8.7    | 8.5  | 9.47 | -1.96 | 0.031454 |
| 564 | F52D2.5    | 3.48 | 4.45 | -1.96 | 0.033154 |
| 565 | Y57G11B.5  | 7.22 | 8.19 | -1.96 | 0.037527 |
| 566 | ndx-4      | 6.49 | 7.46 | -1.96 | 0.038669 |
| 567 | R10E4.9    | 6.23 | 7.21 | -1.96 | 0.041147 |
| 568 | F17C11.12  | 3.61 | 4.58 | -1.96 | 0.044289 |
| 569 | R03H10.1   | 5.34 | 6.31 | -1.95 | 0.00147  |
| 570 | B0462.5    | 6.5  | 7.46 | -1.95 | 0.001792 |
| 571 | F37H8.5    | 7    | 7.96 | -1.95 | 0.002013 |
| 572 | E01A2.5    | 5.37 | 6.34 | -1.95 | 0.00216  |
| 573 | mrps-18A   | 8    | 8.97 | -1.95 | 0.004795 |
| 574 | Y32F6A.4   | 7.15 | 8.12 | -1.95 | 0.005379 |
| 575 | K02E11.7   | 6.6  | 7.56 | -1.95 | 0.012145 |
| 576 | syp-2      | 6.87 | 7.83 | -1.95 | 0.016648 |
| 577 | F42H10.2   | 5.51 | 6.47 | -1.95 | 0.023365 |
| 578 | F43G6.16   | 2.09 | 3.06 | -1.95 | 0.024155 |
| 579 | C55A6.4    | 1.94 | 2.89 | -1.94 | 0.000875 |
| 580 | B0379.1    | 5.68 | 6.64 | -1.94 | 0.001717 |
| 581 | nhr-133    | 5.86 | 6.82 | -1.94 | 0.003625 |
| 582 | sma-2      | 5.08 | 6.04 | -1.94 | 0.006105 |
| 583 | W10G11.1   | 4.25 | 5.21 | -1.94 | 0.007615 |
| 584 | Y54F10AM.5 | 8.41 | 9.36 | -1.94 | 0.010304 |
| 585 | ethe-1     | 3.93 | 4.89 | -1.94 | 0.015933 |
| 586 | C09B7.2    | 6.52 | 7.48 | -1.94 | 0.018488 |
| 587 | mrps-11    | 8.36 | 9.32 | -1.94 | 0.019325 |
| 588 | Y42H9AR.5  | 2.25 | 3.21 | -1.94 | 0.021969 |
| 589 | glrx-21    | 6.49 | 7.44 | -1.94 | 0.024862 |
| 590 | tag-234    | 5.12 | 6.07 | -1.94 | 0.030924 |
| 591 | T06D10.3   | 3.94 | 4.89 | -1.94 | 0.038374 |

|     |            |      |      |       |          |
|-----|------------|------|------|-------|----------|
| 592 | oac-28     | 4.7  | 5.66 | -1.94 | 0.047482 |
| 593 | F13H8.11   | 4.96 | 5.91 | -1.93 | 0.000622 |
| 594 | math-39    | 3.52 | 4.47 | -1.93 | 0.006905 |
| 595 | F53F4.10   | 8.12 | 9.07 | -1.93 | 0.008418 |
| 596 | W02D3.12   | 6.67 | 7.62 | -1.93 | 0.009143 |
| 597 | C05C10.7   | 7.68 | 8.63 | -1.93 | 0.01201  |
| 598 | nhr-153    | 3.92 | 4.87 | -1.93 | 0.012227 |
| 599 | mif-2      | 5.91 | 6.86 | -1.93 | 0.017831 |
| 600 | Y71H2AM.12 | 4.12 | 5.06 | -1.93 | 0.02024  |
| 601 | E02H1.5    | 7.61 | 8.56 | -1.93 | 0.02689  |
| 602 | C32D5.1    | 3.65 | 4.6  | -1.93 | 0.035103 |
| 603 | tag-189    | 5.77 | 6.72 | -1.93 | 0.047648 |
| 604 | ZK1240.2   | 5.02 | 5.97 | -1.92 | 0.001137 |
| 605 | fbxa-127   | 3.76 | 4.71 | -1.92 | 0.001643 |
| 606 | B0393.9    | 5.87 | 6.81 | -1.92 | 0.002434 |
| 607 | C07A4.2    | 3.48 | 4.42 | -1.92 | 0.002755 |
| 608 | ttr-7      | 4.83 | 5.77 | -1.92 | 0.00537  |
| 609 | C23H4.3    | 3.24 | 4.19 | -1.92 | 0.005506 |
| 610 | F32D8.12   | 5.5  | 6.44 | -1.92 | 0.007466 |
| 611 | exos-8     | 6.05 | 6.99 | -1.92 | 0.007815 |
| 612 | prdx-6     | 6.65 | 7.6  | -1.92 | 0.009275 |
| 613 | ZK1098.11  | 5.57 | 6.51 | -1.92 | 0.012068 |
| 614 | F10E7.6    | 6.92 | 7.86 | -1.92 | 0.017695 |
| 615 | F22B7.16   | 2    | 2.94 | -1.92 | 0.019992 |
| 616 | C08H9.15   | 5.58 | 6.52 | -1.92 | 0.020036 |
| 617 | asp-4      | 8.31 | 9.25 | -1.92 | 0.030406 |
| 618 | acbp-1     | 7.72 | 8.66 | -1.92 | 0.032194 |
| 619 | heh-1      | 7.64 | 8.58 | -1.92 | 0.038465 |
| 620 | snr-7      | 6.02 | 6.96 | -1.92 | 0.039671 |
| 621 | Y77E11A.14 | 8.28 | 9.21 | -1.91 | 0.000024 |
| 622 | PDB1.1     | 5.68 | 6.62 | -1.91 | 0.00033  |
| 623 | fbxc-2     | 5.96 | 6.9  | -1.91 | 0.001132 |
| 624 | scrm-2     | 1.85 | 2.78 | -1.91 | 0.002485 |
| 625 | aakg-4     | 5.89 | 6.82 | -1.91 | 0.004143 |
| 626 | ras-2      | 7.39 | 8.32 | -1.91 | 0.005519 |

|     |             |      |       |       |          |
|-----|-------------|------|-------|-------|----------|
| 627 | C37A2.6     | 4.38 | 5.32  | -1.91 | 0.007157 |
| 628 | C29G2.6     | 6.61 | 7.54  | -1.91 | 0.015771 |
| 629 | C24B5.4     | 4.08 | 5.01  | -1.91 | 0.016232 |
| 630 | C50F2.4     | 7.07 | 8     | -1.91 | 0.017878 |
| 631 | Y116F11B.17 | 5.82 | 6.76  | -1.91 | 0.017954 |
| 632 | Y18D10A.3   | 5.5  | 6.43  | -1.91 | 0.021897 |
| 633 | T07A9.15    | 6    | 6.93  | -1.91 | 0.023517 |
| 634 | nhr-109     | 4.99 | 5.92  | -1.91 | 0.028296 |
| 635 | Y37E3.28    | 4.83 | 5.76  | -1.91 | 0.046308 |
| 636 | Y43F8B.24   | 3.59 | 4.51  | -1.9  | 0.000316 |
| 637 | tyr-1       | 6.33 | 7.25  | -1.9  | 0.00091  |
| 638 | T02G5.7     | 7.41 | 8.34  | -1.9  | 0.006292 |
| 639 | ins-10      | 3.96 | 4.88  | -1.9  | 0.006606 |
| 640 | mdt-20      | 6.85 | 7.78  | -1.9  | 0.007244 |
| 641 | Y48A5A.3    | 5.51 | 6.43  | -1.9  | 0.009217 |
| 642 | hpo-18      | 9.63 | 10.56 | -1.9  | 0.014285 |
| 643 | pot-2       | 7.39 | 8.31  | -1.9  | 0.016467 |
| 644 | tag-209     | 6.29 | 7.22  | -1.9  | 0.021513 |
| 645 | hrg-2       | 3.22 | 4.14  | -1.9  | 0.032588 |
| 646 | hint-1      | 6.94 | 7.87  | -1.9  | 0.033149 |
| 647 | F40F11.3    | 6.79 | 7.71  | -1.9  | 0.034167 |
| 648 | F48E3.4     | 7.35 | 8.27  | -1.9  | 0.04003  |
| 649 | Y106G6D.8   | 5.93 | 6.85  | -1.9  | 0.048322 |
| 650 | kbp-2       | 4.63 | 5.55  | -1.9  | 0.049054 |
| 651 | F45H10.2    | 7.33 | 8.24  | -1.89 | 0.006068 |
| 652 | oxy-5       | 7.45 | 8.37  | -1.89 | 0.006129 |
| 653 | F54E7.9     | 7.34 | 8.25  | -1.89 | 0.00639  |
| 654 | C05D9.9     | 8.97 | 9.89  | -1.89 | 0.008854 |
| 655 | R03A10.5    | 5.14 | 6.06  | -1.89 | 0.009571 |
| 656 | ZK185.5     | 5    | 5.92  | -1.89 | 0.011259 |
| 657 | F08B6.1     | 7.24 | 8.16  | -1.89 | 0.013744 |
| 658 | C06E2.12    | 2.42 | 3.34  | -1.89 | 0.013859 |
| 659 | F57C2.4     | 8.12 | 9.04  | -1.89 | 0.017539 |
| 660 | T04C12.8    | 4.08 | 4.99  | -1.89 | 0.022273 |
| 661 | C47E12.9    | 2.52 | 3.44  | -1.89 | 0.023752 |



|            |            |      |       |       |          |
|------------|------------|------|-------|-------|----------|
| <b>662</b> | lips-17    | 3.67 | 4.58  | -1.88 | 0.000101 |
| <b>663</b> | dct-11     | 7.32 | 8.24  | -1.88 | 0.001227 |
| <b>664</b> | R01B10.3   | 8.23 | 9.15  | -1.88 | 0.002483 |
| <b>665</b> | F48D6.4    | 7.49 | 8.4   | -1.88 | 0.002592 |
| <b>666</b> | spp-3      | 9.66 | 10.57 | -1.88 | 0.002747 |
| <b>667</b> | Y71H2AM.14 | 4.03 | 4.94  | -1.88 | 0.014376 |
| <b>668</b> | ckc-1      | 4.29 | 5.2   | -1.88 | 0.014598 |
| <b>669</b> | C17G1.2    | 7.06 | 7.97  | -1.88 | 0.016234 |
| <b>670</b> | T10H9.8    | 7.4  | 8.31  | -1.88 | 0.023076 |
| <b>671</b> | F10F2.12   | 6.1  | 7.01  | -1.88 | 0.024181 |
| <b>672</b> | mrps-24    | 6.38 | 7.29  | -1.88 | 0.026047 |
| <b>673</b> | prx-2      | 4.52 | 5.43  | -1.88 | 0.026684 |
| <b>674</b> | F22F4.4    | 8.13 | 9.04  | -1.88 | 0.033573 |
| <b>675</b> | F59B10.6   | 5.06 | 5.96  | -1.87 | 0.002427 |
| <b>676</b> | lipl-5     | 7.8  | 8.7   | -1.87 | 0.00504  |
| <b>677</b> | F53C11.3   | 6.48 | 7.39  | -1.87 | 0.010343 |
| <b>678</b> | ZK353.9    | 5.41 | 6.31  | -1.87 | 0.011712 |
| <b>679</b> | ttr-1      | 6.15 | 7.06  | -1.87 | 0.016851 |
| <b>680</b> | Y43B11AR.1 | 7.98 | 8.88  | -1.87 | 0.018086 |
| <b>681</b> | C23G10.2   | 6.69 | 7.59  | -1.87 | 0.019116 |
| <b>682</b> | W04D2.14   | 5.21 | 6.11  | -1.87 | 0.02016  |
| <b>683</b> | Y71F9AR.4  | 5.64 | 6.55  | -1.87 | 0.025896 |
| <b>684</b> | ins-22     | 4.81 | 5.71  | -1.87 | 0.026396 |
| <b>685</b> | clcc-169   | 2.34 | 3.24  | -1.87 | 0.041625 |
| <b>686</b> | nceh-1     | 2.78 | 3.67  | -1.86 | 0.000109 |
| <b>687</b> | F21F3.4    | 5.32 | 6.22  | -1.86 | 0.002173 |
| <b>688</b> | W01B11.6   | 6.17 | 7.07  | -1.86 | 0.005298 |
| <b>689</b> | F26A3.4    | 9.06 | 9.95  | -1.86 | 0.006872 |
| <b>690</b> | T16G1.18   | 2.25 | 3.15  | -1.86 | 0.006999 |
| <b>691</b> | nuo-6      | 7.62 | 8.51  | -1.86 | 0.007985 |
| <b>692</b> | mrpl-35    | 6.46 | 7.36  | -1.86 | 0.008011 |
| <b>693</b> | fut-1      | 5.62 | 6.52  | -1.86 | 0.012231 |
| <b>694</b> | C29F9.4    | 3.88 | 4.77  | -1.86 | 0.013762 |
| <b>695</b> | F45G2.7    | 7.22 | 8.12  | -1.86 | 0.014844 |
| <b>696</b> | mrps-21    | 6.91 | 7.81  | -1.86 | 0.015981 |

|            |            |      |       |       |          |
|------------|------------|------|-------|-------|----------|
| <b>697</b> | dhs-12     | 7.35 | 8.24  | -1.86 | 0.01816  |
| <b>698</b> | C48B6.2    | 5.27 | 6.16  | -1.86 | 0.019833 |
| <b>699</b> | fbxa-145   | 3.98 | 4.88  | -1.86 | 0.02055  |
| <b>700</b> | srg-34     | 4.29 | 5.18  | -1.86 | 0.021158 |
| <b>701</b> | C10A4.10   | 6.1  | 7     | -1.86 | 0.025315 |
| <b>702</b> | R04A9.6    | 2.9  | 3.8   | -1.86 | 0.041983 |
| <b>703</b> | inx-11     | 4    | 4.89  | -1.85 | 0.002891 |
| <b>704</b> | C16H3.6    | 4.45 | 5.34  | -1.85 | 0.005958 |
| <b>705</b> | C16H3.7    | 4.45 | 5.34  | -1.85 | 0.005958 |
| <b>706</b> | JC8.4      | 6.44 | 7.33  | -1.85 | 0.008488 |
| <b>707</b> | tag-174    | 9.38 | 10.26 | -1.85 | 0.008981 |
| <b>708</b> | H20J04.9   | 6.75 | 7.63  | -1.85 | 0.009813 |
| <b>709</b> | btb-16     | 2.78 | 3.66  | -1.85 | 0.011112 |
| <b>710</b> | Y71H2B.4   | 6.35 | 7.24  | -1.85 | 0.01305  |
| <b>711</b> | dnc-5      | 7.6  | 8.48  | -1.85 | 0.013323 |
| <b>712</b> | lsm-7      | 7.01 | 7.9   | -1.85 | 0.016946 |
| <b>713</b> | K01C8.7    | 4.79 | 5.68  | -1.85 | 0.017466 |
| <b>714</b> | R151.16    | 7.54 | 8.43  | -1.85 | 0.02834  |
| <b>715</b> | drd-5      | 3.98 | 4.87  | -1.85 | 0.036369 |
| <b>716</b> | trpp-6     | 7.67 | 8.56  | -1.85 | 0.036722 |
| <b>717</b> | C18E9.4    | 7.55 | 8.44  | -1.85 | 0.044047 |
| <b>718</b> | Y105C5A.24 | 6.37 | 7.25  | -1.84 | 0.00059  |
| <b>719</b> | pcp-1      | 6.57 | 7.45  | -1.84 | 0.001975 |
| <b>720</b> | fbxa-77    | 3.94 | 4.81  | -1.84 | 0.007585 |
| <b>721</b> | C15F1.1    | 3.34 | 4.22  | -1.84 | 0.007616 |
| <b>722</b> | ZC410.5    | 7.53 | 8.41  | -1.84 | 0.011921 |
| <b>723</b> | mai-2      | 7.23 | 8.11  | -1.84 | 0.014225 |
| <b>724</b> | blos-9     | 6.58 | 7.46  | -1.84 | 0.017054 |
| <b>725</b> | F44A6.4    | 4.8  | 5.69  | -1.84 | 0.017096 |
| <b>726</b> | R05D7.7    | 4.87 | 5.75  | -1.84 | 0.018397 |
| <b>727</b> | F14F9.5    | 5.93 | 6.81  | -1.84 | 0.018576 |
| <b>728</b> | cox-17     | 4.14 | 5.02  | -1.84 | 0.021161 |
| <b>729</b> | hppt-1     | 8.38 | 9.26  | -1.84 | 0.030208 |
| <b>730</b> | nbet-1     | 6.37 | 7.25  | -1.84 | 0.034368 |
| <b>731</b> | lec-4      | 5.35 | 6.23  | -1.84 | 0.038485 |

|     |            |      |      |       |          |
|-----|------------|------|------|-------|----------|
| 732 | tomm-22    | 6.79 | 7.67 | -1.84 | 0.047015 |
| 733 | F23G4.1    | 2.66 | 3.53 | -1.83 | 0.000021 |
| 734 | Y51H4A.5   | 3.41 | 4.28 | -1.83 | 0.000057 |
| 735 | D1086.5    | 6.66 | 7.53 | -1.83 | 0.000813 |
| 736 | K11D9.3    | 6.13 | 7    | -1.83 | 0.001722 |
| 737 | scav-1     | 6.46 | 7.33 | -1.83 | 0.002249 |
| 738 | R09F10.1   | 4.63 | 5.5  | -1.83 | 0.002927 |
| 739 | best-17    | 4.54 | 5.42 | -1.83 | 0.003617 |
| 740 | fbxa-67    | 4.26 | 5.13 | -1.83 | 0.004508 |
| 741 | H29C22.1   | 6.88 | 7.75 | -1.83 | 0.011949 |
| 742 | T20D4.10   | 3.47 | 4.34 | -1.83 | 0.01236  |
| 743 | crn-5      | 6.1  | 6.98 | -1.83 | 0.012382 |
| 744 | Y102A5C.36 | 5.88 | 6.76 | -1.83 | 0.014345 |
| 745 | T03F1.12   | 5.76 | 6.63 | -1.83 | 0.016847 |
| 746 | D1054.18   | 1.64 | 2.51 | -1.83 | 0.020092 |
| 747 | K07G5.5    | 4.63 | 5.5  | -1.83 | 0.022611 |
| 748 | Y43F4B.9   | 6.2  | 7.07 | -1.83 | 0.024044 |
| 749 | djr-1.1    | 8.14 | 9.01 | -1.83 | 0.024632 |
| 750 | zig-6      | 3.74 | 4.62 | -1.83 | 0.026606 |
| 751 | F14F3.5    | 2.91 | 3.78 | -1.83 | 0.028583 |
| 752 | aman-1     | 4.9  | 5.77 | -1.83 | 0.03962  |
| 753 | T03F7.14   | 8.18 | 9.05 | -1.83 | 0.049018 |
| 754 | lsm-6      | 6.91 | 7.79 | -1.83 | 0.049419 |
| 755 | C14B1.12   | 4.81 | 5.67 | -1.82 | 0.001626 |
| 756 | K08H2.10   | 3.81 | 4.68 | -1.82 | 0.001753 |
| 757 | sfxn-5     | 6.5  | 7.36 | -1.82 | 0.007063 |
| 758 | pcbd-1     | 5.64 | 6.5  | -1.82 | 0.007113 |
| 759 | nhr-126    | 4.66 | 5.52 | -1.82 | 0.007592 |
| 760 | fbxa-188   | 3.6  | 4.47 | -1.82 | 0.008251 |
| 761 | clcc-150   | 9.12 | 9.98 | -1.82 | 0.010178 |
| 762 | C16E9.23   | 1.61 | 2.47 | -1.82 | 0.011073 |
| 763 | C07A4.3    | 3.55 | 4.41 | -1.82 | 0.012447 |
| 764 | F47G3.4    | 4.79 | 5.65 | -1.82 | 0.013454 |
| 765 | F52A8.5    | 7.74 | 8.6  | -1.82 | 0.0175   |
| 766 | C10C5.7    | 6.16 | 7.02 | -1.82 | 0.018602 |

|            |           |      |      |       |          |
|------------|-----------|------|------|-------|----------|
| <b>767</b> | T04F3.2   | 4.98 | 5.84 | -1.82 | 0.020627 |
| <b>768</b> | nhr-90    | 5.78 | 6.64 | -1.82 | 0.024119 |
| <b>769</b> | pdf-6     | 6.84 | 7.7  | -1.82 | 0.025123 |
| <b>770</b> | F32H5.3   | 4.2  | 5.07 | -1.82 | 0.025866 |
| <b>771</b> | T20H4.5   | 8.29 | 9.15 | -1.82 | 0.02886  |
| <b>772</b> | T05A10.6  | 4.63 | 5.49 | -1.82 | 0.030848 |
| <b>773</b> | mrpl-23   | 5.97 | 6.83 | -1.82 | 0.032    |
| <b>774</b> | gst-15    | 3.21 | 4.07 | -1.82 | 0.039633 |
| <b>775</b> | aqp-10    | 6.25 | 7.11 | -1.82 | 0.042433 |
| <b>776</b> | C10G8.4   | 3.13 | 3.99 | -1.82 | 0.049442 |
| <b>777</b> | C06G3.5   | 8.97 | 9.83 | -1.81 | 0.000118 |
| <b>778</b> | lipl-7    | 6.95 | 7.8  | -1.81 | 0.00115  |
| <b>779</b> | ZK632.14  | 7.22 | 8.08 | -1.81 | 0.001842 |
| <b>780</b> | F59B10.5  | 5.91 | 6.76 | -1.81 | 0.003634 |
| <b>781</b> | Y62H9A.11 | 1.91 | 2.76 | -1.81 | 0.004627 |
| <b>782</b> | C53D6.7   | 3.82 | 4.68 | -1.81 | 0.005366 |
| <b>783</b> | K01A11.2  | 4.96 | 5.81 | -1.81 | 0.00749  |
| <b>784</b> | F19C7.1   | 8.52 | 9.38 | -1.81 | 0.00805  |
| <b>785</b> | bath-5    | 6.37 | 7.23 | -1.81 | 0.00954  |
| <b>786</b> | K02E2.6   | 6.17 | 7.03 | -1.81 | 0.011932 |
| <b>787</b> | B0495.9   | 7.09 | 7.95 | -1.81 | 0.015032 |
| <b>788</b> | F28B3.10  | 7.11 | 7.96 | -1.81 | 0.020038 |
| <b>789</b> | Y69A2AR.3 | 6.88 | 7.74 | -1.81 | 0.020775 |
| <b>790</b> | C55A6.7   | 1.6  | 2.46 | -1.81 | 0.026017 |
| <b>791</b> | sel-9     | 8.83 | 9.69 | -1.81 | 0.027407 |
| <b>792</b> | R09D1.12  | 2.23 | 3.08 | -1.81 | 0.029588 |
| <b>793</b> | lipl-3    | 6.28 | 7.14 | -1.81 | 0.031632 |
| <b>794</b> | nhr-265   | 3.62 | 4.47 | -1.81 | 0.0332   |
| <b>795</b> | F26F12.8  | 3.92 | 4.78 | -1.81 | 0.033463 |
| <b>796</b> | fbxa-85   | 2.42 | 3.27 | -1.81 | 0.037816 |
| <b>797</b> | F14H12.10 | 3.1  | 3.95 | -1.81 | 0.039658 |
| <b>798</b> | F14H12.10 | 3.1  | 3.95 | -1.81 | 0.039658 |
| <b>799</b> | ppt-1     | 4.97 | 5.83 | -1.81 | 0.039909 |
| <b>800</b> | W03G9.8   | 8.11 | 8.97 | -1.81 | 0.042849 |
| <b>801</b> | C28G1.2   | 4.69 | 5.53 | -1.8  | 0.001412 |

|     |           |      |      |       |          |
|-----|-----------|------|------|-------|----------|
| 802 | C17H11.5  | 3.07 | 3.91 | -1.8  | 0.003038 |
| 803 | gas-1     | 8.5  | 9.34 | -1.8  | 0.004009 |
| 804 | ZC412.3   | 2.69 | 3.54 | -1.8  | 0.006342 |
| 805 | ndx-3     | 5.91 | 6.75 | -1.8  | 0.006559 |
| 806 | hpo-31    | 6.94 | 7.79 | -1.8  | 0.009374 |
| 807 | F08F1.3   | 6.91 | 7.76 | -1.8  | 0.009472 |
| 808 | K10C9.1   | 1.81 | 2.67 | -1.8  | 0.009607 |
| 809 | F28C6.8   | 8.1  | 8.94 | -1.8  | 0.010649 |
| 810 | T20D4.12  | 3.77 | 4.62 | -1.8  | 0.013617 |
| 811 | F53F4.16  | 8.95 | 9.79 | -1.8  | 0.015336 |
| 812 | T07D4.5   | 6.88 | 7.73 | -1.8  | 0.015342 |
| 813 | F08F8.7   | 6.93 | 7.78 | -1.8  | 0.016987 |
| 814 | C33A12.1  | 7.07 | 7.91 | -1.8  | 0.019629 |
| 815 | prdx-3    | 8.76 | 9.6  | -1.8  | 0.027436 |
| 816 | F44D12.2  | 5.93 | 6.78 | -1.8  | 0.036171 |
| 817 | nhr-111   | 1.66 | 2.51 | -1.8  | 0.043956 |
| 818 | asp-7     | 2.29 | 3.14 | -1.8  | 0.047643 |
| 819 | R04B5.5   | 6.61 | 7.45 | -1.79 | 0.000108 |
| 820 | F31F7.1   | 8.44 | 9.28 | -1.79 | 0.000297 |
| 821 | F39H12.3  | 8.3  | 9.14 | -1.79 | 0.000398 |
| 822 | Y11D7A.3  | 6.34 | 7.17 | -1.79 | 0.000797 |
| 823 | T04C12.11 | 9.05 | 9.89 | -1.79 | 0.00149  |
| 824 | C17G10.7  | 5.51 | 6.36 | -1.79 | 0.003276 |
| 825 | bcmo-2    | 3.4  | 4.24 | -1.79 | 0.003767 |
| 826 | C08G5.6   | 2.73 | 3.57 | -1.79 | 0.004749 |
| 827 | lgc-44    | 4.17 | 5    | -1.79 | 0.005569 |
| 828 | F27E5.1   | 8.23 | 9.07 | -1.79 | 0.005912 |
| 829 | fah-1     | 8.06 | 8.9  | -1.79 | 0.006523 |
| 830 | F48C5.4   | 2.05 | 2.89 | -1.79 | 0.006678 |
| 831 | C33H5.13  | 4.79 | 5.63 | -1.79 | 0.008397 |
| 832 | ctg-1     | 7.18 | 8.02 | -1.79 | 0.014177 |
| 833 | nhr-230   | 4.72 | 5.56 | -1.79 | 0.016528 |
| 834 | ave-1     | 7.98 | 8.82 | -1.79 | 0.01991  |
| 835 | srp-8     | 2.92 | 3.76 | -1.79 | 0.020558 |
| 836 | Y47G6A.21 | 6.73 | 7.57 | -1.79 | 0.022228 |

|            |          |      |      |       |          |
|------------|----------|------|------|-------|----------|
| <b>837</b> | sri-40   | 4.17 | 5    | -1.79 | 0.023433 |
| <b>838</b> | F45H11.5 | 5.43 | 6.27 | -1.79 | 0.024747 |
| <b>839</b> | mutd-1   | 7.02 | 7.86 | -1.79 | 0.024866 |
| <b>840</b> | nhr-42   | 5.1  | 5.94 | -1.79 | 0.027382 |
| <b>841</b> | arch-1   | 6.28 | 7.11 | -1.79 | 0.033102 |
| <b>842</b> | oxa-1    | 6.58 | 7.42 | -1.79 | 0.037942 |
| <b>843</b> | T27E9.2  | 6.29 | 7.13 | -1.79 | 0.040658 |
| <b>844</b> | B0286.3  | 5.22 | 6.05 | -1.78 | 0.000266 |
| <b>845</b> | ZK1321.4 | 6.31 | 7.14 | -1.78 | 0.000419 |
| <b>846</b> | W02B12.4 | 3.85 | 4.68 | -1.78 | 0.000654 |
| <b>847</b> | F37C4.6  | 5.18 | 6.01 | -1.78 | 0.001346 |
| <b>848</b> | C08E3.1  | 7.03 | 7.86 | -1.78 | 0.002038 |
| <b>849</b> | apc-10   | 5.89 | 6.72 | -1.78 | 0.003151 |
| <b>850</b> | fbxa-114 | 5.55 | 6.37 | -1.78 | 0.004018 |
| <b>851</b> | ZC373.5  | 4.15 | 4.98 | -1.78 | 0.004256 |
| <b>852</b> | F25H9.7  | 6.36 | 7.19 | -1.78 | 0.004773 |
| <b>853</b> | F26A3.1  | 7.45 | 8.28 | -1.78 | 0.004811 |
| <b>854</b> | stdh-1   | 3.91 | 4.74 | -1.78 | 0.004835 |
| <b>855</b> | mpst-1   | 6.24 | 7.07 | -1.78 | 0.006009 |
| <b>856</b> | fbxa-5   | 1.77 | 2.6  | -1.78 | 0.008766 |
| <b>857</b> | F35H10.6 | 6.61 | 7.44 | -1.78 | 0.011284 |
| <b>858</b> | T19D12.2 | 4.38 | 5.21 | -1.78 | 0.011586 |
| <b>859</b> | W02D9.4  | 4.87 | 5.71 | -1.78 | 0.011853 |
| <b>860</b> | algn-13  | 7.53 | 8.36 | -1.78 | 0.0126   |
| <b>861</b> | nhr-21   | 5.84 | 6.68 | -1.78 | 0.013409 |
| <b>862</b> | lsm-1    | 6.91 | 7.74 | -1.78 | 0.013652 |
| <b>863</b> | ZK1236.5 | 7.67 | 8.5  | -1.78 | 0.01402  |
| <b>864</b> | F38E11.9 | 3.85 | 4.68 | -1.78 | 0.014971 |
| <b>865</b> | pdf-5    | 8.77 | 9.6  | -1.78 | 0.015241 |
| <b>866</b> | pmp-2    | 5.03 | 5.87 | -1.78 | 0.015476 |
| <b>867</b> | F59C6.12 | 5.9  | 6.73 | -1.78 | 0.015892 |
| <b>868</b> | F55B11.4 | 6    | 6.83 | -1.78 | 0.018833 |
| <b>869</b> | F18F11.1 | 6.34 | 7.17 | -1.78 | 0.020096 |
| <b>870</b> | F58A3.4  | 4.39 | 5.22 | -1.78 | 0.020114 |
| <b>871</b> | syp-3    | 6.72 | 7.55 | -1.78 | 0.025542 |

|            |            |      |       |       |          |
|------------|------------|------|-------|-------|----------|
| <b>872</b> | mrpl-53    | 6.21 | 7.04  | -1.78 | 0.026117 |
| <b>873</b> | ttr-2      | 9.15 | 9.98  | -1.78 | 0.029009 |
| <b>874</b> | pfid-4     | 6.08 | 6.91  | -1.78 | 0.029931 |
| <b>875</b> | B0205.6    | 6.01 | 6.84  | -1.78 | 0.030154 |
| <b>876</b> | C30B5.2    | 7.13 | 7.96  | -1.78 | 0.031438 |
| <b>877</b> | aps-3      | 7.76 | 8.59  | -1.78 | 0.031531 |
| <b>878</b> | B0491.7    | 5.76 | 6.59  | -1.78 | 0.045855 |
| <b>879</b> | F20G2.3    | 4.5  | 5.33  | -1.78 | 0.049624 |
| <b>880</b> | B0228.7    | 7.29 | 8.11  | -1.77 | 0.000595 |
| <b>881</b> | R02D5.8    | 6.1  | 6.92  | -1.77 | 0.000922 |
| <b>882</b> | fipr-1     | 8.93 | 9.76  | -1.77 | 0.000961 |
| <b>883</b> | cysl-2     | 4.91 | 5.74  | -1.77 | 0.001627 |
| <b>884</b> | Y43B11AR.3 | 6.74 | 7.56  | -1.77 | 0.002709 |
| <b>885</b> | Y105C5A.17 | 1.95 | 2.77  | -1.77 | 0.003245 |
| <b>886</b> | F23H12.3   | 4.25 | 5.07  | -1.77 | 0.003587 |
| <b>887</b> | C25H3.14   | 5.05 | 5.88  | -1.77 | 0.003776 |
| <b>888</b> | clcc-1     | 9.69 | 10.52 | -1.77 | 0.005863 |
| <b>889</b> | fbxa-80    | 4.05 | 4.88  | -1.77 | 0.0082   |
| <b>890</b> | alh-3      | 7.67 | 8.49  | -1.77 | 0.008452 |
| <b>891</b> | F41C3.1    | 2.14 | 2.97  | -1.77 | 0.011287 |
| <b>892</b> | idhg-2     | 4.54 | 5.37  | -1.77 | 0.012577 |
| <b>893</b> | C41G7.8    | 6.19 | 7.01  | -1.77 | 0.01262  |
| <b>894</b> | D1005.4    | 4.73 | 5.55  | -1.77 | 0.013218 |
| <b>895</b> | fbf-2      | 5.66 | 6.48  | -1.77 | 0.013635 |
| <b>896</b> | T27C5.8    | 2.49 | 3.31  | -1.77 | 0.016312 |
| <b>897</b> | mrpl-50    | 7.51 | 8.34  | -1.77 | 0.016669 |
| <b>898</b> | R12B2.2    | 3.85 | 4.67  | -1.77 | 0.020158 |
| <b>899</b> | T05H4.10   | 7.31 | 8.13  | -1.77 | 0.022163 |
| <b>900</b> | ZK616.3    | 5.04 | 5.86  | -1.77 | 0.024821 |
| <b>901</b> | C46G7.2    | 7.85 | 8.67  | -1.77 | 0.025934 |
| <b>902</b> | ttr-20     | 5.36 | 6.18  | -1.77 | 0.028008 |
| <b>903</b> | tin-10     | 6.31 | 7.14  | -1.77 | 0.033971 |
| <b>904</b> | C31H5.4    | 6.83 | 7.65  | -1.77 | 0.035613 |
| <b>905</b> | sdz-27     | 7.42 | 8.24  | -1.77 | 0.047862 |
| <b>906</b> | C17H12.8   | 7.26 | 8.07  | -1.76 | 0.000609 |

|            |            |       |       |       |          |
|------------|------------|-------|-------|-------|----------|
| <b>907</b> | glt-5      | 5.69  | 6.51  | -1.76 | 0.003289 |
| <b>908</b> | C03B1.14   | 4.42  | 5.23  | -1.76 | 0.00635  |
| <b>909</b> | evl-20     | 6.61  | 7.42  | -1.76 | 0.006506 |
| <b>910</b> | K03H1.11   | 7.43  | 8.25  | -1.76 | 0.007377 |
| <b>911</b> | ttl-15     | 2.88  | 3.69  | -1.76 | 0.008802 |
| <b>912</b> | Y82E9BR.21 | 4.83  | 5.65  | -1.76 | 0.009186 |
| <b>913</b> | nas-11     | 4.72  | 5.54  | -1.76 | 0.009767 |
| <b>914</b> | F59A2.5    | 6.61  | 7.43  | -1.76 | 0.011115 |
| <b>915</b> | F35H10.14  | 2.39  | 3.21  | -1.76 | 0.017635 |
| <b>916</b> | B0416.11   | 2.86  | 3.67  | -1.76 | 0.021129 |
| <b>917</b> | W03D8.8    | 3.56  | 4.37  | -1.76 | 0.021143 |
| <b>918</b> | Y54G2A.10  | 10.36 | 11.17 | -1.76 | 0.021902 |
| <b>919</b> | clk-1      | 7.6   | 8.41  | -1.76 | 0.022258 |
| <b>920</b> | mmab-1     | 5.31  | 6.13  | -1.76 | 0.023363 |
| <b>921</b> | F08H9.13   | 6.09  | 6.9   | -1.76 | 0.024581 |
| <b>922</b> | T11B7.5    | 4.66  | 5.48  | -1.76 | 0.026142 |
| <b>923</b> | Y53F4B.23  | 2.67  | 3.48  | -1.76 | 0.028295 |
| <b>924</b> | rad-8      | 6.28  | 7.09  | -1.76 | 0.035326 |
| <b>925</b> | bath-7     | 4.28  | 5.1   | -1.76 | 0.036249 |
| <b>926</b> | Y66A7A.2   | 5.68  | 6.5   | -1.76 | 0.039622 |
| <b>927</b> | syx-6      | 4.87  | 5.68  | -1.76 | 0.039946 |
| <b>928</b> | Y69E1A.5   | 4.41  | 5.23  | -1.76 | 0.043024 |
| <b>929</b> | K10B3.1    | 5.78  | 6.59  | -1.76 | 0.048378 |
| <b>930</b> | B0284.1    | 4.37  | 5.18  | -1.76 | 0.049539 |
| <b>931</b> | pyk-2      | 6.99  | 7.79  | -1.75 | 0.000064 |
| <b>932</b> | Y37D8A.2   | 9.23  | 10.04 | -1.75 | 0.001113 |
| <b>933</b> | ceh-60     | 5.24  | 6.05  | -1.75 | 0.002119 |
| <b>934</b> | fat-1      | 10.3  | 11.1  | -1.75 | 0.002272 |
| <b>935</b> | vglu-2     | 6.28  | 7.09  | -1.75 | 0.002344 |
| <b>936</b> | C34C12.7   | 4.24  | 5.05  | -1.75 | 0.005039 |
| <b>937</b> | C53A5.16   | 5.85  | 6.66  | -1.75 | 0.005414 |
| <b>938</b> | T04A6.2    | 4.02  | 4.83  | -1.75 | 0.005764 |
| <b>939</b> | coq-4      | 6.09  | 6.9   | -1.75 | 0.007352 |
| <b>940</b> | ubq-2      | 9.41  | 10.22 | -1.75 | 0.011045 |
| <b>941</b> | rpc-11     | 4.97  | 5.78  | -1.75 | 0.0115   |



|     |            |      |       |       |          |
|-----|------------|------|-------|-------|----------|
| 942 | R04F11.2   | 8.07 | 8.87  | -1.75 | 0.011655 |
| 943 | Y55B1AL.2  | 7.98 | 8.79  | -1.75 | 0.011682 |
| 944 | nhr-210    | 3.91 | 4.72  | -1.75 | 0.012087 |
| 945 | T19D2.3    | 4.86 | 5.67  | -1.75 | 0.012874 |
| 946 | C25H3.9    | 8.15 | 8.96  | -1.75 | 0.014254 |
| 947 | nhr-19     | 6.57 | 7.38  | -1.75 | 0.017789 |
| 948 | mrpl-32    | 7.22 | 8.03  | -1.75 | 0.018242 |
| 949 | C44B7.7    | 4.62 | 5.43  | -1.75 | 0.019208 |
| 950 | mrpl-21    | 6.6  | 7.41  | -1.75 | 0.020075 |
| 951 | fbxa-13    | 4.04 | 4.85  | -1.75 | 0.021149 |
| 952 | C03D6.1    | 4.24 | 5.04  | -1.75 | 0.021238 |
| 953 | C17E4.4    | 6.34 | 7.14  | -1.75 | 0.022088 |
| 954 | Y119D3B.13 | 7.27 | 8.08  | -1.75 | 0.023967 |
| 955 | Y51H7C.26  | 1.27 | 2.08  | -1.75 | 0.02655  |
| 956 | rmo-1      | 7.37 | 8.18  | -1.75 | 0.026636 |
| 957 | tag-261    | 6.09 | 6.89  | -1.75 | 0.039412 |
| 958 | gst-23     | 4    | 4.8   | -1.74 | 0.000186 |
| 959 | sqst-2     | 6.43 | 7.23  | -1.74 | 0.000214 |
| 960 | C35E7.6    | 4.72 | 5.52  | -1.74 | 0.002979 |
| 961 | F26G1.2    | 7.84 | 8.64  | -1.74 | 0.003944 |
| 962 | atic-1     | 4.93 | 5.73  | -1.74 | 0.00437  |
| 963 | T20G5.14   | 8.71 | 9.51  | -1.74 | 0.007421 |
| 964 | Y51H1A.3   | 9.79 | 10.59 | -1.74 | 0.009543 |
| 965 | F58G11.4   | 3.98 | 4.78  | -1.74 | 0.014212 |
| 966 | trpp-5     | 7.66 | 8.45  | -1.74 | 0.014717 |
| 967 | fbxa-69    | 4.36 | 5.16  | -1.74 | 0.016466 |
| 968 | mrps-25    | 7.38 | 8.17  | -1.74 | 0.017305 |
| 969 | elo-6      | 7.92 | 8.72  | -1.74 | 0.021489 |
| 970 | C06G3.8    | 8.96 | 9.76  | -1.74 | 0.022734 |
| 971 | F47B8.2    | 8.55 | 9.35  | -1.74 | 0.025438 |
| 972 | C27H5.4    | 5.3  | 6.1   | -1.74 | 0.025778 |
| 973 | nhr-58     | 4.8  | 5.6   | -1.74 | 0.02759  |
| 974 | Y53C12A.10 | 7.45 | 8.25  | -1.74 | 0.032748 |
| 975 | fahd-1     | 5.6  | 6.4   | -1.74 | 0.03711  |
| 976 | mtx-2      | 8.41 | 9.21  | -1.74 | 0.038549 |

|             |            |      |       |       |          |
|-------------|------------|------|-------|-------|----------|
| <b>977</b>  | T19B4.3    | 7.12 | 7.92  | -1.74 | 0.039703 |
| <b>978</b>  | gpx-6      | 1.89 | 2.69  | -1.74 | 0.044092 |
| <b>979</b>  | F45G2.9    | 6.18 | 6.97  | -1.73 | 0.001772 |
| <b>980</b>  | nuo-4      | 8.19 | 8.98  | -1.73 | 0.004002 |
| <b>981</b>  | Y48E1C.4   | 6.44 | 7.22  | -1.73 | 0.005907 |
| <b>982</b>  | Y94H6A.8   | 9.25 | 10.04 | -1.73 | 0.007267 |
| <b>983</b>  | Y60A3A.9   | 9.01 | 9.81  | -1.73 | 0.009195 |
| <b>984</b>  | rps-21     | 9.4  | 10.19 | -1.73 | 0.010326 |
| <b>985</b>  | F30F8.5    | 5.26 | 6.06  | -1.73 | 0.010732 |
| <b>986</b>  | ZK1127.12  | 5.26 | 6.05  | -1.73 | 0.012458 |
| <b>987</b>  | T10B9.13   | 2.54 | 3.32  | -1.73 | 0.013357 |
| <b>988</b>  | K08F9.1    | 4.7  | 5.49  | -1.73 | 0.017506 |
| <b>989</b>  | ZK688.11   | 7.53 | 8.32  | -1.73 | 0.017777 |
| <b>990</b>  | C04C11.8   | 3.66 | 4.45  | -1.73 | 0.019426 |
| <b>991</b>  | trpl-4     | 2.8  | 3.59  | -1.73 | 0.023445 |
| <b>992</b>  | T23G11.4   | 7.1  | 7.89  | -1.73 | 0.023556 |
| <b>993</b>  | Y39B6A.13  | 6.94 | 7.72  | -1.73 | 0.025519 |
| <b>994</b>  | W10D9.6    | 5.94 | 6.73  | -1.73 | 0.02789  |
| <b>995</b>  | apc-11     | 7.37 | 8.16  | -1.73 | 0.029132 |
| <b>996</b>  | Y111B2A.13 | 5.45 | 6.24  | -1.73 | 0.032912 |
| <b>997</b>  | nhr-162    | 3.21 | 4     | -1.73 | 0.033909 |
| <b>998</b>  | cbl-1      | 3.58 | 4.37  | -1.73 | 0.039818 |
| <b>999</b>  | R186.8     | 6.19 | 6.98  | -1.73 | 0.040212 |
| <b>1000</b> | Y38H6C.23  | 3.53 | 4.32  | -1.72 | 0.000376 |
| <b>1001</b> | csq-1      | 9.57 | 10.35 | -1.72 | 0.000417 |
| <b>1002</b> | alh-12     | 7.07 | 7.85  | -1.72 | 0.002147 |
| <b>1003</b> | gfrp-1     | 4.93 | 5.72  | -1.72 | 0.002265 |
| <b>1004</b> | fbxa-108   | 5.63 | 6.4   | -1.72 | 0.00247  |
| <b>1005</b> | atad-3     | 7.17 | 7.95  | -1.72 | 0.004216 |
| <b>1006</b> | T08A9.13   | 4.85 | 5.63  | -1.72 | 0.005981 |
| <b>1007</b> | trd-1      | 6.2  | 6.98  | -1.72 | 0.006663 |
| <b>1008</b> | Y41E3.22   | 4.84 | 5.62  | -1.72 | 0.007352 |
| <b>1009</b> | vps-22     | 8.97 | 9.75  | -1.72 | 0.007684 |
| <b>1010</b> | rpl-14     | 9.76 | 10.55 | -1.72 | 0.009336 |
| <b>1011</b> | C25D7.15   | 3.05 | 3.83  | -1.72 | 0.009437 |

|             |            |      |       |       |          |
|-------------|------------|------|-------|-------|----------|
| <b>1012</b> | orc-4      | 5.55 | 6.33  | -1.72 | 0.010148 |
| <b>1013</b> | F48C1.5    | 8.05 | 8.83  | -1.72 | 0.010981 |
| <b>1014</b> | ZC262.9    | 2.81 | 3.59  | -1.72 | 0.011999 |
| <b>1015</b> | ZC262.9    | 2.81 | 3.59  | -1.72 | 0.011999 |
| <b>1016</b> | T28A8.5    | 6.01 | 6.79  | -1.72 | 0.012169 |
| <b>1017</b> | M18.3      | 6.56 | 7.34  | -1.72 | 0.012265 |
| <b>1018</b> | F22D3.5    | 7.11 | 7.89  | -1.72 | 0.016096 |
| <b>1019</b> | Y54G11A.17 | 7.08 | 7.86  | -1.72 | 0.017524 |
| <b>1020</b> | hap-1      | 4.97 | 5.75  | -1.72 | 0.018203 |
| <b>1021</b> | F48A9.5    | 1.39 | 2.17  | -1.72 | 0.019938 |
| <b>1022</b> | fbxa-98    | 3.17 | 3.95  | -1.72 | 0.02073  |
| <b>1023</b> | K12H4.5    | 5.84 | 6.63  | -1.72 | 0.022661 |
| <b>1024</b> | C08A9.10   | 6.47 | 7.25  | -1.72 | 0.022866 |
| <b>1025</b> | T06E6.10   | 6.55 | 7.33  | -1.72 | 0.023567 |
| <b>1026</b> | D2005.3    | 6.28 | 7.06  | -1.72 | 0.025655 |
| <b>1027</b> | fbxa-76    | 4.81 | 5.59  | -1.72 | 0.028976 |
| <b>1028</b> | mrpl-20    | 6.25 | 7.03  | -1.72 | 0.031799 |
| <b>1029</b> | B0495.5    | 5.34 | 6.12  | -1.72 | 0.03339  |
| <b>1030</b> | C07H6.14   | 2.7  | 3.48  | -1.72 | 0.037466 |
| <b>1031</b> | oac-34     | 3.07 | 3.86  | -1.72 | 0.040213 |
| <b>1032</b> | EEED8.3    | 6.39 | 7.17  | -1.72 | 0.044179 |
| <b>1033</b> | F26E4.2    | 3.22 | 4.01  | -1.72 | 0.045915 |
| <b>1034</b> | Y63D3A.7   | 6.67 | 7.46  | -1.72 | 0.047378 |
| <b>1035</b> | F44A2.10   | 1.37 | 2.14  | -1.71 | 0.001968 |
| <b>1036</b> | nuc-1      | 9.25 | 10.02 | -1.71 | 0.001968 |
| <b>1037</b> | mrpl-55    | 6.9  | 7.67  | -1.71 | 0.003461 |
| <b>1038</b> | ipla-7     | 7.34 | 8.11  | -1.71 | 0.004839 |
| <b>1039</b> | F40F12.7   | 5.35 | 6.13  | -1.71 | 0.005154 |
| <b>1040</b> | nuo-2      | 8.23 | 9.01  | -1.71 | 0.006008 |
| <b>1041</b> | flp-22     | 6.96 | 7.73  | -1.71 | 0.007098 |
| <b>1042</b> | C16C8.11   | 3.05 | 3.82  | -1.71 | 0.011203 |
| <b>1043</b> | mnr-1      | 6.37 | 7.14  | -1.71 | 0.012081 |
| <b>1044</b> | Y40B1B.7   | 8.24 | 9.01  | -1.71 | 0.012693 |
| <b>1045</b> | B0348.2    | 3.57 | 4.35  | -1.71 | 0.014087 |
| <b>1046</b> | F13B12.2   | 3.39 | 4.16  | -1.71 | 0.014102 |

|             |             |       |       |       |          |
|-------------|-------------|-------|-------|-------|----------|
| <b>1047</b> | B0410.3     | 7.52  | 8.29  | -1.71 | 0.016393 |
| <b>1048</b> | C29F7.2     | 8.41  | 9.18  | -1.71 | 0.019178 |
| <b>1049</b> | linc-14     | 2.87  | 3.65  | -1.71 | 0.019602 |
| <b>1050</b> | C24H11.5    | 7.53  | 8.3   | -1.71 | 0.020342 |
| <b>1051</b> | W09C3.4     | 5.55  | 6.33  | -1.71 | 0.020475 |
| <b>1052</b> | C47B2.2     | 8.28  | 9.05  | -1.71 | 0.024992 |
| <b>1053</b> | C50B8.4     | 4.19  | 4.97  | -1.71 | 0.0277   |
| <b>1054</b> | C47B2.9     | 6.51  | 7.29  | -1.71 | 0.029446 |
| <b>1055</b> | taf-13      | 8.36  | 9.14  | -1.71 | 0.037444 |
| <b>1056</b> | chil-23     | 2.85  | 3.63  | -1.71 | 0.038008 |
| <b>1057</b> | Y69A2AL.2   | 9.65  | 10.42 | -1.71 | 0.03818  |
| <b>1058</b> | mrps-23     | 6.03  | 6.81  | -1.71 | 0.039072 |
| <b>1059</b> | sodh-1      | 11.06 | 11.84 | -1.71 | 0.045158 |
| <b>1060</b> | rpb-10      | 8.54  | 9.31  | -1.71 | 0.045993 |
| <b>1061</b> | F09E5.3     | 8.76  | 9.53  | -1.7  | 0.001614 |
| <b>1062</b> | Y34F4.5     | 7.84  | 8.61  | -1.7  | 0.004065 |
| <b>1063</b> | fmo-1       | 5.24  | 6.01  | -1.7  | 0.004316 |
| <b>1064</b> | Y39G10AR.32 | 5.61  | 6.37  | -1.7  | 0.004799 |
| <b>1065</b> | F36H12.2    | 3.21  | 3.98  | -1.7  | 0.005248 |
| <b>1066</b> | T15B7.1     | 6.74  | 7.5   | -1.7  | 0.007232 |
| <b>1067</b> | F42A9.8     | 7.44  | 8.2   | -1.7  | 0.009739 |
| <b>1068</b> | C01H6.3     | 2.37  | 3.14  | -1.7  | 0.011764 |
| <b>1069</b> | mrpl-49     | 6.32  | 7.09  | -1.7  | 0.016325 |
| <b>1070</b> | rpl-39      | 11.02 | 11.78 | -1.7  | 0.018129 |
| <b>1071</b> | dhs-3       | 4.91  | 5.68  | -1.7  | 0.019224 |
| <b>1072</b> | ZK686.1     | 8.43  | 9.2   | -1.7  | 0.030286 |
| <b>1073</b> | F17H10.2    | 7.95  | 8.72  | -1.7  | 0.030646 |
| <b>1074</b> | ddp-1       | 8.69  | 9.45  | -1.7  | 0.031572 |
| <b>1075</b> | dhs-18      | 7.5   | 8.26  | -1.7  | 0.032856 |
| <b>1076</b> | acs-21      | 3.85  | 4.61  | -1.7  | 0.036923 |
| <b>1077</b> | R151.6      | 8.16  | 8.93  | -1.7  | 0.037435 |
| <b>1078</b> | emb-1       | 7.59  | 8.35  | -1.7  | 0.039704 |
| <b>1079</b> | T10F2.2     | 7.16  | 7.92  | -1.7  | 0.040335 |
| <b>1080</b> | T07A5.5     | 8.67  | 9.44  | -1.7  | 0.045317 |
| <b>1081</b> | T17A3.2     | 4.67  | 5.43  | -1.7  | 0.046291 |

|      |            |      |      |       |          |
|------|------------|------|------|-------|----------|
| 1082 | C23H3.2    | 7.37 | 8.12 | -1.69 | 0.00009  |
| 1083 | Y49E10.16  | 8.83 | 9.59 | -1.69 | 0.000329 |
| 1084 | twk-26     | 5.07 | 5.82 | -1.69 | 0.000494 |
| 1085 | fbxa-82    | 3.29 | 4.05 | -1.69 | 0.004638 |
| 1086 | D2096.13   | 1.39 | 2.15 | -1.69 | 0.004749 |
| 1087 | nduf-7     | 8.94 | 9.7  | -1.69 | 0.004772 |
| 1088 | E04F6.4    | 4.78 | 5.54 | -1.69 | 0.005045 |
| 1089 | D2096.1    | 4.19 | 4.95 | -1.69 | 0.005254 |
| 1090 | ugt-31     | 3.9  | 4.65 | -1.69 | 0.005261 |
| 1091 | mrps-22    | 6.15 | 6.91 | -1.69 | 0.005678 |
| 1092 | ZK637.12   | 2.82 | 3.58 | -1.69 | 0.006396 |
| 1093 | H19N07.3   | 7.8  | 8.56 | -1.69 | 0.007332 |
| 1094 | cyp-37B1   | 6.12 | 6.88 | -1.69 | 0.007835 |
| 1095 | C49A9.10   | 4.55 | 5.3  | -1.69 | 0.007936 |
| 1096 | C10B5.1    | 5.01 | 5.76 | -1.69 | 0.007977 |
| 1097 | Y69A2AR.25 | 2.17 | 2.92 | -1.69 | 0.008604 |
| 1098 | K07F5.16   | 5.95 | 6.71 | -1.69 | 0.008665 |
| 1099 | ggtb-1     | 6.08 | 6.83 | -1.69 | 0.008776 |
| 1100 | Y47H10A.4  | 5.23 | 5.99 | -1.69 | 0.010096 |
| 1101 | mrps-2     | 8.04 | 8.79 | -1.69 | 0.010841 |
| 1102 | C34B2.8    | 8.84 | 9.6  | -1.69 | 0.01087  |
| 1103 | nhr-36     | 4.3  | 5.06 | -1.69 | 0.011531 |
| 1104 | sod-2      | 7.22 | 7.98 | -1.69 | 0.012324 |
| 1105 | F32B4.5    | 6.71 | 7.47 | -1.69 | 0.013535 |
| 1106 | F47B8.3    | 4.74 | 5.5  | -1.69 | 0.015575 |
| 1107 | T01H8.2    | 4.82 | 5.58 | -1.69 | 0.018711 |
| 1108 | C16A3.2    | 6.43 | 7.19 | -1.69 | 0.019281 |
| 1109 | C25E10.8   | 4.44 | 5.2  | -1.69 | 0.019525 |
| 1110 | ptr-14     | 4.5  | 5.26 | -1.69 | 0.022831 |
| 1111 | dhfr-1     | 7.73 | 8.49 | -1.69 | 0.023541 |
| 1112 | eif-3.F    | 9.05 | 9.81 | -1.69 | 0.024086 |
| 1113 | C50B6.9    | 3.98 | 4.73 | -1.69 | 0.026217 |
| 1114 | Y54E5A.5   | 7.2  | 7.97 | -1.69 | 0.029234 |
| 1115 | dhs-11     | 5.69 | 6.45 | -1.69 | 0.035573 |
| 1116 | mrpl-51    | 8.59 | 9.34 | -1.69 | 0.037386 |

|      |           |       |       |       |          |
|------|-----------|-------|-------|-------|----------|
| 1117 | B0563.5   | 3.28  | 4.04  | -1.69 | 0.045173 |
| 1118 | best-5    | 4.08  | 4.84  | -1.68 | 0.002681 |
| 1119 | T08B1.4   | 6.79  | 7.54  | -1.68 | 0.002681 |
| 1120 | F49C12.14 | 2.42  | 3.17  | -1.68 | 0.002701 |
| 1121 | ZK632.12  | 5.3   | 6.04  | -1.68 | 0.004409 |
| 1122 | trpp-4    | 6.1   | 6.85  | -1.68 | 0.005029 |
| 1123 | F16H11.1  | 3.37  | 4.11  | -1.68 | 0.005043 |
| 1124 | rpia-1    | 9.62  | 10.37 | -1.68 | 0.006224 |
| 1125 | T27A3.6   | 6.55  | 7.3   | -1.68 | 0.006533 |
| 1126 | T09A5.5   | 6.63  | 7.38  | -1.68 | 0.008542 |
| 1127 | nola-3    | 10.32 | 11.07 | -1.68 | 0.01052  |
| 1128 | Y95D11A.1 | 6.72  | 7.47  | -1.68 | 0.01081  |
| 1129 | K02D10.4  | 6.29  | 7.04  | -1.68 | 0.013571 |
| 1130 | Y46G5A.20 | 6.08  | 6.82  | -1.68 | 0.017689 |
| 1131 | asg-1     | 8.51  | 9.26  | -1.68 | 0.02468  |
| 1132 | F23C8.3   | 3.69  | 4.44  | -1.68 | 0.030109 |
| 1133 | Y119C1B.6 | 6.83  | 7.58  | -1.68 | 0.031594 |
| 1134 | E02H1.2   | 6.85  | 7.6   | -1.68 | 0.032766 |
| 1135 | F58H1.8   | 4.72  | 5.47  | -1.68 | 0.034501 |
| 1136 | nxt-1     | 6.55  | 7.29  | -1.68 | 0.040778 |
| 1137 | F30A10.9  | 7.71  | 8.46  | -1.68 | 0.040961 |
| 1138 | col-139   | 8.13  | 8.88  | -1.68 | 0.04478  |
| 1139 | T06A10.3  | 7.51  | 8.25  | -1.68 | 0.047622 |
| 1140 | T19E7.22  | 2.89  | 3.63  | -1.67 | 0.000313 |
| 1141 | C39D10.11 | 5.56  | 6.3   | -1.67 | 0.000816 |
| 1142 | col-181   | 9.6   | 10.34 | -1.67 | 0.00096  |
| 1143 | Y54H5A.2  | 7.8   | 8.53  | -1.67 | 0.00303  |
| 1144 | ZK1320.9  | 7.73  | 8.47  | -1.67 | 0.00437  |
| 1145 | ets-10    | 2.87  | 3.61  | -1.67 | 0.00519  |
| 1146 | M05D6.6   | 5.39  | 6.14  | -1.67 | 0.006646 |
| 1147 | F46F11.10 | 4.95  | 5.69  | -1.67 | 0.011927 |
| 1148 | Y106G6H.8 | 7.25  | 7.99  | -1.67 | 0.012861 |
| 1149 | C34E11.4  | 2.85  | 3.59  | -1.67 | 0.013246 |
| 1150 | F38H4.10  | 5.96  | 6.71  | -1.67 | 0.013577 |
| 1151 | T24C2.5   | 6.98  | 7.73  | -1.67 | 0.013586 |

|             |            |      |       |       |          |
|-------------|------------|------|-------|-------|----------|
| <b>1152</b> | fbxa-91    | 2.61 | 3.35  | -1.67 | 0.022013 |
| <b>1153</b> | F56D5.6    | 6.18 | 6.92  | -1.67 | 0.024742 |
| <b>1154</b> | dnj-26     | 4.95 | 5.68  | -1.67 | 0.025137 |
| <b>1155</b> | Y37E11B.6  | 5.64 | 6.38  | -1.67 | 0.029749 |
| <b>1156</b> | F46B6.9    | 3.37 | 4.11  | -1.67 | 0.031535 |
| <b>1157</b> | dnc-3      | 6.68 | 7.42  | -1.67 | 0.032423 |
| <b>1158</b> | W06G6.9    | 2.49 | 3.23  | -1.67 | 0.04399  |
| <b>1159</b> | clcc-50    | 8.66 | 9.39  | -1.66 | 0.000088 |
| <b>1160</b> | fat-3      | 10.2 | 10.93 | -1.66 | 0.000543 |
| <b>1161</b> | ugt-61     | 3.69 | 4.42  | -1.66 | 0.002729 |
| <b>1162</b> | bca-2      | 7.39 | 8.12  | -1.66 | 0.004011 |
| <b>1163</b> | gst-43     | 6.15 | 6.88  | -1.66 | 0.004192 |
| <b>1164</b> | B0228.1    | 6.37 | 7.1   | -1.66 | 0.006323 |
| <b>1165</b> | maoc-1     | 5.76 | 6.5   | -1.66 | 0.009343 |
| <b>1166</b> | T25F10.1   | 4.03 | 4.76  | -1.66 | 0.012044 |
| <b>1167</b> | C27B7.2    | 6.9  | 7.63  | -1.66 | 0.012547 |
| <b>1168</b> | T05F1.11   | 4.75 | 5.48  | -1.66 | 0.014555 |
| <b>1169</b> | F40H3.2    | 2.52 | 3.25  | -1.66 | 0.01476  |
| <b>1170</b> | W09B6.4    | 6.59 | 7.32  | -1.66 | 0.015563 |
| <b>1171</b> | Y97E10AL.3 | 6.22 | 6.96  | -1.66 | 0.015707 |
| <b>1172</b> | C04A11.5   | 3.51 | 4.24  | -1.66 | 0.017319 |
| <b>1173</b> | R12C12.1   | 7.47 | 8.19  | -1.66 | 0.017761 |
| <b>1174</b> | nlp-41     | 5.64 | 6.37  | -1.66 | 0.017877 |
| <b>1175</b> | R07E5.11   | 5.52 | 6.25  | -1.66 | 0.019286 |
| <b>1176</b> | flu-2      | 5.44 | 6.17  | -1.66 | 0.021217 |
| <b>1177</b> | ugt-6      | 4.08 | 4.81  | -1.66 | 0.023192 |
| <b>1178</b> | mxl-1      | 7.31 | 8.04  | -1.66 | 0.023685 |
| <b>1179</b> | tomm-7     | 9.67 | 10.4  | -1.66 | 0.028366 |
| <b>1180</b> | marb-1     | 7.13 | 7.86  | -1.66 | 0.029814 |
| <b>1181</b> | F39H2.3    | 7.71 | 8.44  | -1.66 | 0.029945 |
| <b>1182</b> | fmo-4      | 5.13 | 5.86  | -1.66 | 0.030252 |
| <b>1183</b> | nlp-36     | 8.2  | 8.93  | -1.66 | 0.035821 |
| <b>1184</b> | cyn-12     | 7.64 | 8.37  | -1.66 | 0.038382 |
| <b>1185</b> | F48E3.2    | 3.83 | 4.57  | -1.66 | 0.038426 |
| <b>1186</b> | F58B6.7    | 1.55 | 2.28  | -1.66 | 0.043945 |

|      |              |      |      |       |          |
|------|--------------|------|------|-------|----------|
| 1187 | mlc-7        | 7.93 | 8.66 | -1.66 | 0.046276 |
| 1188 | bcs-1        | 7.75 | 8.47 | -1.65 | 0.000801 |
| 1189 | F56A8.5      | 7.06 | 7.78 | -1.65 | 0.000957 |
| 1190 | nhr-103      | 5.77 | 6.5  | -1.65 | 0.001021 |
| 1191 | Y4C6B.7      | 3.99 | 4.71 | -1.65 | 0.003644 |
| 1192 | F55C12.6     | 1.27 | 1.99 | -1.65 | 0.003787 |
| 1193 | R05G6.5      | 4.12 | 4.84 | -1.65 | 0.003916 |
| 1194 | cyp-32A1     | 4.15 | 4.87 | -1.65 | 0.004187 |
| 1195 | C16A11.10    | 5.83 | 6.55 | -1.65 | 0.006073 |
| 1196 | ard-1        | 8.73 | 9.46 | -1.65 | 0.007459 |
| 1197 | tut-2        | 6.45 | 7.17 | -1.65 | 0.009552 |
| 1198 | Y82E9BR.13   | 3.94 | 4.66 | -1.65 | 0.009679 |
| 1199 | T23B5.4      | 6.11 | 6.83 | -1.65 | 0.01033  |
| 1200 | Y41C4A.8     | 4.79 | 5.52 | -1.65 | 0.011064 |
| 1201 | ech-5        | 6.69 | 7.41 | -1.65 | 0.011935 |
| 1202 | best-1       | 4.1  | 4.83 | -1.65 | 0.01236  |
| 1203 | emc-3        | 8.05 | 8.78 | -1.65 | 0.012739 |
| 1204 | F23C11.2     | 2.1  | 2.83 | -1.65 | 0.01296  |
| 1205 | srbc-8       | 1.32 | 2.04 | -1.65 | 0.013743 |
| 1206 | Y105C5A.1268 | 3.38 | 4.1  | -1.65 | 0.014568 |
| 1207 | M110.3       | 6.82 | 7.55 | -1.65 | 0.016066 |
| 1208 | C16C8.5      | 5.34 | 6.06 | -1.65 | 0.018176 |
| 1209 | T09A5.15     | 2.67 | 3.39 | -1.65 | 0.019933 |
| 1210 | arl-5        | 6.97 | 7.69 | -1.65 | 0.021107 |
| 1211 | C41D11.9     | 4.95 | 5.67 | -1.65 | 0.022948 |
| 1212 | T14B4.2      | 7.79 | 8.51 | -1.65 | 0.023256 |
| 1213 | mrpl-15      | 7.37 | 8.09 | -1.65 | 0.02625  |
| 1214 | skr-19       | 7.49 | 8.22 | -1.65 | 0.033384 |
| 1215 | srbc-20      | 3.01 | 3.74 | -1.65 | 0.033753 |
| 1216 | F17E9.4      | 7    | 7.72 | -1.65 | 0.037179 |
| 1217 | syx-7        | 6.42 | 7.14 | -1.65 | 0.040756 |
| 1218 | lmtr-2       | 8.12 | 8.84 | -1.65 | 0.042068 |
| 1219 | F38E11.21    | 2.63 | 3.35 | -1.65 | 0.042178 |
| 1220 | pot-1        | 5.45 | 6.17 | -1.65 | 0.04393  |
| 1221 | rpl-29       | 5.14 | 5.87 | -1.65 | 0.049683 |



|      |            |      |       |       |          |
|------|------------|------|-------|-------|----------|
| 1222 | C38C3.10   | 2.91 | 3.62  | -1.64 | 0.000672 |
| 1223 | T05E12.6   | 5.47 | 6.18  | -1.64 | 0.000881 |
| 1224 | acs-11     | 7.3  | 8.02  | -1.64 | 0.003195 |
| 1225 | mlt-4      | 3.38 | 4.09  | -1.64 | 0.003294 |
| 1226 | eng-1      | 7.18 | 7.89  | -1.64 | 0.003785 |
| 1227 | Y54G11A.7  | 5.08 | 5.79  | -1.64 | 0.009024 |
| 1228 | ZK669.3    | 5.74 | 6.46  | -1.64 | 0.010193 |
| 1229 | fbxc-54    | 3.81 | 4.52  | -1.64 | 0.010265 |
| 1230 | C42C1.13   | 4.27 | 4.98  | -1.64 | 0.012199 |
| 1231 | jtr-1      | 7.5  | 8.21  | -1.64 | 0.012517 |
| 1232 | Y51H4A.15  | 7.69 | 8.41  | -1.64 | 0.016844 |
| 1233 | glod-4     | 6.78 | 7.49  | -1.64 | 0.01877  |
| 1234 | mrpl-12    | 6.85 | 7.56  | -1.64 | 0.021199 |
| 1235 | ins-27     | 5.99 | 6.71  | -1.64 | 0.021426 |
| 1236 | F41E7.7    | 3.71 | 4.43  | -1.64 | 0.022493 |
| 1237 | algn-2     | 5.63 | 6.34  | -1.64 | 0.023701 |
| 1238 | dhs-6      | 6.45 | 7.16  | -1.64 | 0.024876 |
| 1239 | nduf-6     | 7.36 | 8.08  | -1.64 | 0.025269 |
| 1240 | C01H6.4    | 3.38 | 4.09  | -1.64 | 0.026246 |
| 1241 | prx-12     | 4.05 | 4.77  | -1.64 | 0.027381 |
| 1242 | ech-2      | 6.81 | 7.52  | -1.64 | 0.027958 |
| 1243 | ttr-17     | 7.84 | 8.56  | -1.64 | 0.029968 |
| 1244 | Y57G7A.1   | 3.69 | 4.4   | -1.64 | 0.03481  |
| 1245 | F22D6.18   | 1.21 | 1.92  | -1.64 | 0.035897 |
| 1246 | C02F5.13   | 5.98 | 6.7   | -1.64 | 0.036997 |
| 1247 | clcc-65    | 8.47 | 9.18  | -1.63 | 0.000234 |
| 1248 | T28H10.1   | 6.88 | 7.58  | -1.63 | 0.000604 |
| 1249 | C05D2.17   | 5.21 | 5.92  | -1.63 | 0.001275 |
| 1250 | K11D12.12  | 6.7  | 7.41  | -1.63 | 0.00219  |
| 1251 | T09A12.5   | 9.46 | 10.16 | -1.63 | 0.003498 |
| 1252 | acox-5     | 4.26 | 4.97  | -1.63 | 0.00396  |
| 1253 | flp-12     | 6.16 | 6.87  | -1.63 | 0.004867 |
| 1254 | Y45F10D.10 | 5.67 | 6.38  | -1.63 | 0.005513 |
| 1255 | cisd-3.1   | 7.58 | 8.28  | -1.63 | 0.007115 |
| 1256 | C35B8.3    | 6.3  | 7     | -1.63 | 0.007506 |

|      |           |       |       |       |          |
|------|-----------|-------|-------|-------|----------|
| 1257 | F49F1.5   | 5.41  | 6.11  | -1.63 | 0.008376 |
| 1258 | rla-2     | 9.63  | 10.34 | -1.63 | 0.011381 |
| 1259 | nep-4     | 3.41  | 4.11  | -1.63 | 0.012323 |
| 1260 | wdr-12    | 7.37  | 8.08  | -1.63 | 0.012381 |
| 1261 | F57F5.1   | 6.24  | 6.94  | -1.63 | 0.012598 |
| 1262 | F38A6.5   | 5.56  | 6.27  | -1.63 | 0.013223 |
| 1263 | F28B3.6   | 7.84  | 8.55  | -1.63 | 0.017717 |
| 1264 | T20D3.6   | 7.83  | 8.54  | -1.63 | 0.019581 |
| 1265 | F11A5.15  | 2.61  | 3.31  | -1.63 | 0.019631 |
| 1266 | T01G1.4   | 7.2   | 7.91  | -1.63 | 0.020052 |
| 1267 | Y71H2AM.4 | 9.18  | 9.88  | -1.63 | 0.020642 |
| 1268 | ugt-60    | 4.57  | 5.27  | -1.63 | 0.021627 |
| 1269 | Y47H10A.3 | 4.35  | 5.05  | -1.63 | 0.024928 |
| 1270 | VB0395L.1 | 3.5   | 4.21  | -1.63 | 0.025056 |
| 1271 | sucg-1    | 7.86  | 8.56  | -1.63 | 0.025237 |
| 1272 | F56A8.9   | 4.33  | 5.03  | -1.63 | 0.026175 |
| 1273 | F58A4.6   | 6.19  | 6.9   | -1.63 | 0.026457 |
| 1274 | F25B4.4   | 6.75  | 7.46  | -1.63 | 0.026699 |
| 1275 | F40F8.1   | 6.18  | 6.89  | -1.63 | 0.028699 |
| 1276 | C32D5.8   | 7.77  | 8.48  | -1.63 | 0.029613 |
| 1277 | nhr-69    | 6.7   | 7.4   | -1.63 | 0.029941 |
| 1278 | F07A11.5  | 5.77  | 6.48  | -1.63 | 0.034083 |
| 1279 | math-35   | 4.69  | 5.39  | -1.63 | 0.035118 |
| 1280 | W03D2.9   | 4.11  | 4.81  | -1.63 | 0.04368  |
| 1281 | ugt-23    | 7.06  | 7.76  | -1.62 | 0.000281 |
| 1282 | spp-5     | 11.95 | 12.65 | -1.62 | 0.000296 |
| 1283 | ugt-49    | 5.82  | 6.51  | -1.62 | 0.000532 |
| 1284 | chil-8    | 1.53  | 2.22  | -1.62 | 0.001525 |
| 1285 | jmjd-5    | 5.08  | 5.78  | -1.62 | 0.00189  |
| 1286 | moma-1    | 8.78  | 9.48  | -1.62 | 0.002113 |
| 1287 | C34F11.8  | 4.89  | 5.59  | -1.62 | 0.002376 |
| 1288 | T09F3.4   | 6.28  | 6.97  | -1.62 | 0.003294 |
| 1289 | ZK688.9   | 7.04  | 7.74  | -1.62 | 0.004094 |
| 1290 | F26F4.12  | 7.5   | 8.2   | -1.62 | 0.0052   |
| 1291 | dhs-30    | 4.64  | 5.33  | -1.62 | 0.006559 |

|             |           |      |      |       |          |
|-------------|-----------|------|------|-------|----------|
| <b>1292</b> | C28G1.6   | 4.24 | 4.94 | -1.62 | 0.006935 |
| <b>1293</b> | C16C10.8  | 7.08 | 7.78 | -1.62 | 0.009593 |
| <b>1294</b> | phf-30    | 7.35 | 8.05 | -1.62 | 0.010369 |
| <b>1295</b> | F55G1.5   | 5.76 | 6.46 | -1.62 | 0.010892 |
| <b>1296</b> | F35G12.7  | 6.6  | 7.3  | -1.62 | 0.013202 |
| <b>1297</b> | F18A11.3  | 5.98 | 6.68 | -1.62 | 0.014116 |
| <b>1298</b> | F27D4.8   | 6.41 | 7.11 | -1.62 | 0.015986 |
| <b>1299</b> | rpb-6     | 6.64 | 7.34 | -1.62 | 0.016024 |
| <b>1300</b> | C11D2.7   | 7.21 | 7.91 | -1.62 | 0.017072 |
| <b>1301</b> | K07F5.15  | 8.49 | 9.19 | -1.62 | 0.019613 |
| <b>1302</b> | F09C6.12  | 5.26 | 5.96 | -1.62 | 0.02292  |
| <b>1303</b> | cyn-1     | 8.22 | 8.92 | -1.62 | 0.023243 |
| <b>1304</b> | ugtp-1    | 6.41 | 7.1  | -1.62 | 0.023374 |
| <b>1305</b> | Y66D12A.9 | 5.87 | 6.56 | -1.62 | 0.026417 |
| <b>1306</b> | coq-5     | 7.13 | 7.83 | -1.62 | 0.026962 |
| <b>1307</b> | dpy-31    | 5.77 | 6.47 | -1.62 | 0.029899 |
| <b>1308</b> | Y43F8A.1  | 5.19 | 5.89 | -1.62 | 0.037441 |
| <b>1309</b> | F53A9.8   | 6.34 | 7.03 | -1.62 | 0.03989  |
| <b>1310</b> | C29A12.1  | 7.34 | 8.03 | -1.62 | 0.046662 |
| <b>1311</b> | F38B6.4   | 3.72 | 4.41 | -1.62 | 0.046763 |
| <b>1312</b> | fbxa-141  | 1.93 | 2.63 | -1.62 | 0.047812 |
| <b>1313</b> | math-45   | 2.53 | 3.22 | -1.61 | 0.000198 |
| <b>1314</b> | clcc-229  | 2.24 | 2.93 | -1.61 | 0.000221 |
| <b>1315</b> | cpz-2     | 7.57 | 8.26 | -1.61 | 0.000347 |
| <b>1316</b> | glr-1     | 3.9  | 4.58 | -1.61 | 0.000857 |
| <b>1317</b> | asm-3     | 5.46 | 6.15 | -1.61 | 0.001337 |
| <b>1318</b> | C13F10.5  | 7.08 | 7.77 | -1.61 | 0.004124 |
| <b>1319</b> | R01B10.4  | 6.69 | 7.38 | -1.61 | 0.005961 |
| <b>1320</b> | mif-3     | 7.04 | 7.73 | -1.61 | 0.007841 |
| <b>1321</b> | K02B2.6   | 1.32 | 2.01 | -1.61 | 0.008138 |
| <b>1322</b> | nhr-184   | 3.72 | 4.41 | -1.61 | 0.010226 |
| <b>1323</b> | Y26E6A.3  | 5.3  | 5.99 | -1.61 | 0.010827 |
| <b>1324</b> | Y95D11A.3 | 6.77 | 7.45 | -1.61 | 0.010957 |
| <b>1325</b> | C27D6.12  | 4.44 | 5.12 | -1.61 | 0.0122   |
| <b>1326</b> | algn-7    | 6.5  | 7.19 | -1.61 | 0.012235 |

|      |          |      |      |       |          |
|------|----------|------|------|-------|----------|
| 1327 | D1054.1  | 5.19 | 5.88 | -1.61 | 0.014477 |
| 1328 | dohh-1   | 7.18 | 7.86 | -1.61 | 0.014567 |
| 1329 | D2007.1  | 6.77 | 7.46 | -1.61 | 0.016491 |
| 1330 | asb-1    | 9.1  | 9.78 | -1.61 | 0.017401 |
| 1331 | E02H4.4  | 4.9  | 5.59 | -1.61 | 0.019044 |
| 1332 | Y71F9B.2 | 5.83 | 6.52 | -1.61 | 0.019756 |
| 1333 | F19C6.8  | 4.38 | 5.07 | -1.61 | 0.020538 |
| 1334 | T05H4.15 | 2.12 | 2.8  | -1.61 | 0.020806 |
| 1335 | pinn-1   | 6.62 | 7.31 | -1.61 | 0.020888 |
| 1336 | fbxa-106 | 4.94 | 5.63 | -1.61 | 0.023269 |
| 1337 | dnj-16   | 7.11 | 7.79 | -1.61 | 0.023543 |
| 1338 | rhr-2    | 2.69 | 3.38 | -1.61 | 0.023992 |
| 1339 | R02D3.1  | 7.71 | 8.39 | -1.61 | 0.024462 |
| 1340 | R151.1   | 3.31 | 4    | -1.61 | 0.027831 |
| 1341 | nubp-1   | 6.54 | 7.23 | -1.61 | 0.029385 |
| 1342 | pho-7    | 3.08 | 3.77 | -1.61 | 0.031864 |
| 1343 | T24H7.3  | 7.74 | 8.43 | -1.61 | 0.032889 |
| 1344 | Y47G6A.9 | 5.98 | 6.66 | -1.61 | 0.034853 |
| 1345 | F58G6.3  | 4.23 | 4.91 | -1.61 | 0.035432 |
| 1346 | C01A2.2  | 4.89 | 5.58 | -1.61 | 0.041404 |
| 1347 | npr-20   | 4.93 | 5.62 | -1.61 | 0.045955 |
| 1348 | C49A9.3  | 3.83 | 4.51 | -1.61 | 0.048166 |
| 1349 | F20A1.6  | 4.5  | 5.19 | -1.6  | 0.000138 |
| 1350 | F46C5.10 | 5.74 | 6.41 | -1.6  | 0.00044  |
| 1351 | F40F8.4  | 5.39 | 6.07 | -1.6  | 0.001111 |
| 1352 | col-153  | 4.71 | 5.4  | -1.6  | 0.0015   |
| 1353 | K10D3.6  | 5    | 5.69 | -1.6  | 0.002779 |
| 1354 | col-118  | 6.42 | 7.1  | -1.6  | 0.00283  |
| 1355 | tmbi-4   | 8.77 | 9.45 | -1.6  | 0.003198 |
| 1356 | E02H9.2  | 4.61 | 5.3  | -1.6  | 0.003475 |
| 1357 | homt-1   | 7.55 | 8.23 | -1.6  | 0.004219 |
| 1358 | dph-1    | 7.96 | 8.64 | -1.6  | 0.004296 |
| 1359 | del-6    | 7.8  | 8.48 | -1.6  | 0.004789 |
| 1360 | tbcc-1   | 6.85 | 7.53 | -1.6  | 0.005874 |
| 1361 | linc-61  | 1.9  | 2.58 | -1.6  | 0.007083 |

|      |            |       |       |       |          |
|------|------------|-------|-------|-------|----------|
| 1362 | kel-3      | 6.71  | 7.39  | -1.6  | 0.00944  |
| 1363 | M18.6      | 6.62  | 7.3   | -1.6  | 0.010505 |
| 1364 | F23B12.4   | 8.89  | 9.57  | -1.6  | 0.012798 |
| 1365 | dhp-2      | 5.57  | 6.24  | -1.6  | 0.014216 |
| 1366 | lpd-5      | 6.23  | 6.91  | -1.6  | 0.014477 |
| 1367 | F53F8.4    | 6.63  | 7.31  | -1.6  | 0.019568 |
| 1368 | W06G6.10   | 3.13  | 3.81  | -1.6  | 0.021709 |
| 1369 | dlc-2      | 3.17  | 3.85  | -1.6  | 0.024402 |
| 1370 | clec-56    | 5.7   | 6.37  | -1.6  | 0.024791 |
| 1371 | C48B4.6    | 7.26  | 7.94  | -1.6  | 0.026198 |
| 1372 | cyn-3      | 9.59  | 10.27 | -1.6  | 0.026755 |
| 1373 | nuo-3      | 8.86  | 9.54  | -1.6  | 0.02688  |
| 1374 | F22E12.3   | 2.33  | 3.01  | -1.6  | 0.030558 |
| 1375 | trm-1      | 6.73  | 7.4   | -1.6  | 0.030562 |
| 1376 | R12C12.9   | 4.62  | 5.3   | -1.6  | 0.032399 |
| 1377 | F08G5.15   | 2.9   | 3.57  | -1.6  | 0.034188 |
| 1378 | C08B6.8    | 6.52  | 7.2   | -1.6  | 0.036308 |
| 1379 | F44E2.9    | 5.51  | 6.19  | -1.6  | 0.040333 |
| 1380 | D1086.7    | 7.35  | 8.02  | -1.6  | 0.045134 |
| 1381 | C06A12.3   | 5.18  | 5.85  | -1.6  | 0.045697 |
| 1382 | F57B10.5   | 8.1   | 8.79  | -1.6  | 0.046977 |
| 1383 | Y113G7A.16 | 1.46  | 2.14  | -1.6  | 0.0488   |
| 1384 | phip-1     | 6.25  | 6.94  | -1.6  | 0.049338 |
| 1385 | T28D6.10   | 11.01 | 11.68 | -1.6  | 0.049923 |
| 1386 | fbxa-4     | 4.39  | 5.06  | -1.59 | 0.003848 |
| 1387 | Y49F6B.2   | 6.7   | 7.37  | -1.59 | 0.005013 |
| 1388 | got-2.2    | 9.93  | 10.59 | -1.59 | 0.005043 |
| 1389 | C56A3.5    | 8.22  | 8.89  | -1.59 | 0.005964 |
| 1390 | F15D4.2    | 7.18  | 7.85  | -1.59 | 0.007377 |
| 1391 | cisd-3.2   | 8.41  | 9.08  | -1.59 | 0.007898 |
| 1392 | frpr-11    | 4.68  | 5.36  | -1.59 | 0.008419 |
| 1393 | C39H7.4    | 6.03  | 6.7   | -1.59 | 0.011049 |
| 1394 | lin-52     | 7.22  | 7.88  | -1.59 | 0.011443 |
| 1395 | math-22    | 3.3   | 3.97  | -1.59 | 0.01293  |
| 1396 | pmt-2      | 9.49  | 10.16 | -1.59 | 0.01496  |

|      |            |       |       |       |          |
|------|------------|-------|-------|-------|----------|
| 1397 | mrpl-41    | 7.43  | 8.09  | -1.59 | 0.015309 |
| 1398 | Y37F4.8    | 2.48  | 3.15  | -1.59 | 0.016015 |
| 1399 | cnb-1      | 7.49  | 8.16  | -1.59 | 0.016438 |
| 1400 | mrps-6     | 8.27  | 8.94  | -1.59 | 0.017631 |
| 1401 | Y69A2AR.21 | 8.52  | 9.19  | -1.59 | 0.02055  |
| 1402 | nhr-136    | 5.23  | 5.9   | -1.59 | 0.021077 |
| 1403 | D1007.8    | 5.15  | 5.82  | -1.59 | 0.021159 |
| 1404 | ZC434.7    | 5.76  | 6.43  | -1.59 | 0.022687 |
| 1405 | R07E5.13   | 6.89  | 7.56  | -1.59 | 0.022885 |
| 1406 | oac-50     | 3.82  | 4.49  | -1.59 | 0.023264 |
| 1407 | fbxa-10    | 2.84  | 3.51  | -1.59 | 0.02342  |
| 1408 | F56C9.7    | 6.39  | 7.06  | -1.59 | 0.023719 |
| 1409 | C48B4.11   | 7.9   | 8.57  | -1.59 | 0.026993 |
| 1410 | dhs-19     | 5.49  | 6.15  | -1.59 | 0.027249 |
| 1411 | B0035.3    | 7.09  | 7.76  | -1.59 | 0.032463 |
| 1412 | txl-1      | 8.79  | 9.45  | -1.59 | 0.035232 |
| 1413 | C51E3.6    | 4.22  | 4.9   | -1.59 | 0.03663  |
| 1414 | ZC239.5    | 3.71  | 4.38  | -1.59 | 0.040423 |
| 1415 | kgb-2      | 4.82  | 5.49  | -1.59 | 0.040568 |
| 1416 | C50F4.1    | 7.73  | 8.38  | -1.58 | 0.000607 |
| 1417 | F55A11.6   | 6.25  | 6.91  | -1.58 | 0.001028 |
| 1418 | best-21    | 6     | 6.66  | -1.58 | 0.001388 |
| 1419 | C09D4.2    | 8.39  | 9.05  | -1.58 | 0.001548 |
| 1420 | Y54G2A.36  | 7.48  | 8.14  | -1.58 | 0.002147 |
| 1421 | ekl-1      | 7.41  | 8.08  | -1.58 | 0.002851 |
| 1422 | upb-1      | 9.87  | 10.53 | -1.58 | 0.004586 |
| 1423 | fars-3     | 7.91  | 8.57  | -1.58 | 0.004885 |
| 1424 | R04A9.9    | 2.86  | 3.52  | -1.58 | 0.004975 |
| 1425 | mec-15     | 7.3   | 7.96  | -1.58 | 0.00896  |
| 1426 | Y37E3.8    | 10.93 | 11.59 | -1.58 | 0.009915 |
| 1427 | Y57E12AM.1 | 8.77  | 9.43  | -1.58 | 0.010353 |
| 1428 | ZK1098.4   | 6.72  | 7.37  | -1.58 | 0.010782 |
| 1429 | K03A11.5   | 6.17  | 6.83  | -1.58 | 0.010956 |
| 1430 | D2023.4    | 5.97  | 6.63  | -1.58 | 0.013497 |
| 1431 | lipl-1     | 5.59  | 6.24  | -1.58 | 0.013741 |

|      |            |       |       |       |          |
|------|------------|-------|-------|-------|----------|
| 1432 | ooc-5      | 7.34  | 8     | -1.58 | 0.013753 |
| 1433 | mboa-2     | 7.14  | 7.8   | -1.58 | 0.016774 |
| 1434 | Y18H1A.4   | 5.89  | 6.55  | -1.58 | 0.018649 |
| 1435 | B0361.6    | 6.66  | 7.32  | -1.58 | 0.019134 |
| 1436 | btb-19     | 6.52  | 7.18  | -1.58 | 0.020059 |
| 1437 | rps-28     | 11.33 | 11.99 | -1.58 | 0.021317 |
| 1438 | F37B12.3   | 8.84  | 9.5   | -1.58 | 0.022278 |
| 1439 | Y47G6A.22  | 5.72  | 6.38  | -1.58 | 0.023028 |
| 1440 | W05H7.2    | 4.29  | 4.95  | -1.58 | 0.030916 |
| 1441 | B0207.6    | 7.55  | 8.21  | -1.58 | 0.035365 |
| 1442 | C46C2.7    | 4.82  | 5.48  | -1.58 | 0.035602 |
| 1443 | lips-16    | 3.22  | 3.89  | -1.58 | 0.043478 |
| 1444 | add-2      | 5.12  | 5.77  | -1.58 | 0.046725 |
| 1445 | Y54E10BR.2 | 6.52  | 7.18  | -1.58 | 0.047808 |
| 1446 | F52C6.3    | 4.73  | 5.39  | -1.57 | 0.001421 |
| 1447 | cri-2      | 5.51  | 6.16  | -1.57 | 0.002346 |
| 1448 | Y54E10BR.4 | 8.02  | 8.67  | -1.57 | 0.002448 |
| 1449 | Y17D7B.4   | 4.26  | 4.91  | -1.57 | 0.002623 |
| 1450 | Y73F8A.14  | 1.14  | 1.79  | -1.57 | 0.004286 |
| 1451 | tсен-34    | 8.51  | 9.16  | -1.57 | 0.004461 |
| 1452 | R74.7      | 6.91  | 7.56  | -1.57 | 0.007038 |
| 1453 | F31E3.6    | 10.31 | 10.96 | -1.57 | 0.007933 |
| 1454 | dmsr-6     | 4.46  | 5.11  | -1.57 | 0.010378 |
| 1455 | clik-1     | 9.73  | 10.38 | -1.57 | 0.010879 |
| 1456 | C05C12.6   | 3.58  | 4.22  | -1.57 | 0.011292 |
| 1457 | F08A7.1    | 5.37  | 6.02  | -1.57 | 0.011532 |
| 1458 | nhr-193    | 4.45  | 5.1   | -1.57 | 0.012014 |
| 1459 | sod-1      | 8.62  | 9.26  | -1.57 | 0.012644 |
| 1460 | F48C1.6    | 7.53  | 8.18  | -1.57 | 0.01459  |
| 1461 | rab-39     | 8.3   | 8.95  | -1.57 | 0.015273 |
| 1462 | grl-11     | 3.34  | 3.99  | -1.57 | 0.015692 |
| 1463 | T14B4.3    | 5.79  | 6.44  | -1.57 | 0.016474 |
| 1464 | Y71H2AL.2  | 5.17  | 5.82  | -1.57 | 0.017889 |
| 1465 | F56B3.11   | 7.57  | 8.22  | -1.57 | 0.018932 |
| 1466 | H39E20.1   | 3.67  | 4.32  | -1.57 | 0.019098 |

|      |            |       |       |       |          |
|------|------------|-------|-------|-------|----------|
| 1467 | csn-3      | 7.24  | 7.89  | -1.57 | 0.020627 |
| 1468 | Y74C10AL.2 | 7.76  | 8.41  | -1.57 | 0.027415 |
| 1469 | fbxa-206   | 4.41  | 5.06  | -1.57 | 0.028235 |
| 1470 | F55H2.5    | 5.49  | 6.13  | -1.57 | 0.03063  |
| 1471 | W10G11.4   | 2.2   | 2.85  | -1.57 | 0.031192 |
| 1472 | dhs-21     | 3.94  | 4.59  | -1.57 | 0.032082 |
| 1473 | ZK265.11   | 10.76 | 11.41 | -1.57 | 0.033056 |
| 1474 | gcl-1      | 4.71  | 5.36  | -1.57 | 0.035945 |
| 1475 | R144.12    | 6.33  | 6.98  | -1.57 | 0.03772  |
| 1476 | pix-1      | 4.45  | 5.11  | -1.57 | 0.043291 |
| 1477 | ttr-35     | 6.22  | 6.87  | -1.57 | 0.044002 |
| 1478 | K08C7.4    | 3.49  | 4.14  | -1.57 | 0.044297 |
| 1479 | Y48C3A.3   | 6.08  | 6.72  | -1.56 | 0.001319 |
| 1480 | ulp-3      | 7.78  | 8.41  | -1.56 | 0.00132  |
| 1481 | Y102A5C.2  | 5.77  | 6.41  | -1.56 | 0.002862 |
| 1482 | cytb-5.2   | 9.34  | 9.98  | -1.56 | 0.004447 |
| 1483 | hus-1      | 6.62  | 7.27  | -1.56 | 0.00624  |
| 1484 | T15H9.2    | 5.64  | 6.28  | -1.56 | 0.007485 |
| 1485 | ZK265.6    | 8.24  | 8.89  | -1.56 | 0.007885 |
| 1486 | T07D10.3   | 5.33  | 5.97  | -1.56 | 0.009293 |
| 1487 | fbxa-210   | 6.76  | 7.4   | -1.56 | 0.009633 |
| 1488 | copz-1     | 7.78  | 8.42  | -1.56 | 0.010465 |
| 1489 | rpl-32     | 10.63 | 11.28 | -1.56 | 0.01166  |
| 1490 | F26F4.9    | 6.18  | 6.82  | -1.56 | 0.011802 |
| 1491 | coq-2      | 6.74  | 7.38  | -1.56 | 0.013138 |
| 1492 | pst-2      | 4.4   | 5.04  | -1.56 | 0.016446 |
| 1493 | bath-24    | 3.92  | 4.56  | -1.56 | 0.018826 |
| 1494 | K05C4.5    | 6.13  | 6.77  | -1.56 | 0.018929 |
| 1495 | Y47G6A.7   | 7.17  | 7.81  | -1.56 | 0.020088 |
| 1496 | nspc-6     | 11    | 11.64 | -1.56 | 0.022463 |
| 1497 | nspc-6     | 11    | 11.64 | -1.56 | 0.022463 |
| 1498 | mnm-2      | 5.12  | 5.76  | -1.56 | 0.023265 |
| 1499 | R107.2     | 6.52  | 7.16  | -1.56 | 0.023416 |
| 1500 | F55F8.3    | 7.62  | 8.26  | -1.56 | 0.023478 |
| 1501 | ska-1      | 6.08  | 6.72  | -1.56 | 0.024008 |



|      |           |      |      |       |          |
|------|-----------|------|------|-------|----------|
| 1502 | C34B2.10  | 7.45 | 8.09 | -1.56 | 0.029146 |
| 1503 | gana-1    | 5.1  | 5.74 | -1.56 | 0.029811 |
| 1504 | his-37    | 8.66 | 9.3  | -1.56 | 0.030564 |
| 1505 | T28A8.8   | 4.84 | 5.48 | -1.56 | 0.031655 |
| 1506 | K03D3.2   | 2.64 | 3.28 | -1.56 | 0.032313 |
| 1507 | F40F8.3   | 6.65 | 7.29 | -1.56 | 0.033633 |
| 1508 | gop-2     | 6.14 | 6.79 | -1.56 | 0.034228 |
| 1509 | ufc-1     | 8.11 | 8.75 | -1.56 | 0.03667  |
| 1510 | VB0393L.2 | 7.74 | 8.38 | -1.56 | 0.037897 |
| 1511 | VB0393L.2 | 7.74 | 8.38 | -1.56 | 0.037897 |
| 1512 | C25H3.17  | 6.5  | 7.14 | -1.56 | 0.038415 |
| 1513 | Y47G6A.34 | 2.37 | 3.01 | -1.56 | 0.040074 |
| 1514 | Y54G2A.16 | 4.18 | 4.82 | -1.56 | 0.043688 |
| 1515 | F56H9.9   | 2.25 | 2.89 | -1.56 | 0.046537 |
| 1516 | T05E7.4   | 5.82 | 6.45 | -1.55 | 0.000884 |
| 1517 | misc-1    | 6.55 | 7.18 | -1.55 | 0.001072 |
| 1518 | cox-11    | 7.07 | 7.7  | -1.55 | 0.00201  |
| 1519 | B0304.4   | 7.29 | 7.92 | -1.55 | 0.002205 |
| 1520 | C16A3.5   | 7.01 | 7.65 | -1.55 | 0.00223  |
| 1521 | cco-1     | 8.85 | 9.49 | -1.55 | 0.006264 |
| 1522 | Y24D9A.8  | 8.18 | 8.82 | -1.55 | 0.006659 |
| 1523 | exos-7    | 7.45 | 8.09 | -1.55 | 0.00698  |
| 1524 | taco-1    | 6.49 | 7.12 | -1.55 | 0.007248 |
| 1525 | alh-9     | 5.89 | 6.52 | -1.55 | 0.008763 |
| 1526 | gop-3     | 8.26 | 8.89 | -1.55 | 0.010012 |
| 1527 | C44B7.5   | 8.45 | 9.08 | -1.55 | 0.010247 |
| 1528 | nhr-286   | 5.46 | 6.09 | -1.55 | 0.011285 |
| 1529 | C01H6.6   | 5.38 | 6.01 | -1.55 | 0.011685 |
| 1530 | C10C6.11  | 4.88 | 5.51 | -1.55 | 0.014917 |
| 1531 | fbxa-3    | 2.85 | 3.48 | -1.55 | 0.015101 |
| 1532 | F27D4.7   | 8.53 | 9.16 | -1.55 | 0.015653 |
| 1533 | Y56A3A.19 | 7.89 | 8.52 | -1.55 | 0.016094 |
| 1534 | rpb-4     | 7.52 | 8.15 | -1.55 | 0.016317 |
| 1535 | Y42G9A.2  | 5.11 | 5.75 | -1.55 | 0.016421 |
| 1536 | B0432.10  | 6.84 | 7.47 | -1.55 | 0.016917 |

|      |           |      |       |       |          |
|------|-----------|------|-------|-------|----------|
| 1537 | C33F10.14 | 8.69 | 9.32  | -1.55 | 0.01749  |
| 1538 | ZC239.17  | 4.96 | 5.6   | -1.55 | 0.017716 |
| 1539 | fog-2     | 5.47 | 6.1   | -1.55 | 0.019758 |
| 1540 | mrps-12   | 7.43 | 8.06  | -1.55 | 0.019838 |
| 1541 | K09C4.4   | 5.48 | 6.11  | -1.55 | 0.021273 |
| 1542 | F42A6.6   | 5.57 | 6.21  | -1.55 | 0.021283 |
| 1543 | C43E11.9  | 6.58 | 7.21  | -1.55 | 0.025363 |
| 1544 | C25F6.1   | 5.93 | 6.56  | -1.55 | 0.025884 |
| 1545 | Y43F8C.13 | 4.17 | 4.8   | -1.55 | 0.027955 |
| 1546 | F56C11.3  | 6.95 | 7.58  | -1.55 | 0.028373 |
| 1547 | ttr-16    | 9.74 | 10.37 | -1.55 | 0.028591 |
| 1548 | nstp-1    | 6.05 | 6.68  | -1.55 | 0.028605 |
| 1549 | qdpr-1    | 7.6  | 8.23  | -1.55 | 0.034725 |
| 1550 | F14F11.2  | 8.18 | 8.82  | -1.55 | 0.036337 |
| 1551 | fbxa-79   | 4.01 | 4.64  | -1.55 | 0.036668 |
| 1552 | ZK1127.3  | 7.61 | 8.25  | -1.55 | 0.046021 |
| 1553 | K09G1.1   | 5.9  | 6.54  | -1.55 | 0.046642 |
| 1554 | Y14H12A.2 | 2.62 | 3.25  | -1.55 | 0.049966 |
| 1555 | F46B6.4   | 5.84 | 6.47  | -1.54 | 0.00058  |
| 1556 | F28F8.9   | 6.53 | 7.15  | -1.54 | 0.001716 |
| 1557 | capa-1    | 7.21 | 7.83  | -1.54 | 0.001888 |
| 1558 | C17H12.4  | 4.37 | 5     | -1.54 | 0.003068 |
| 1559 | nhr-143   | 5.54 | 6.16  | -1.54 | 0.003254 |
| 1560 | abts-2    | 5.18 | 5.8   | -1.54 | 0.005218 |
| 1561 | grd-4     | 1.85 | 2.47  | -1.54 | 0.005599 |
| 1562 | T25G3.3   | 8.97 | 9.59  | -1.54 | 0.006987 |
| 1563 | bath-4    | 3.44 | 4.06  | -1.54 | 0.007772 |
| 1564 | mec-3     | 1.97 | 2.59  | -1.54 | 0.008251 |
| 1565 | F34D10.9  | 2.85 | 3.47  | -1.54 | 0.008985 |
| 1566 | M04B2.2   | 6.83 | 7.45  | -1.54 | 0.009949 |
| 1567 | imp-3     | 7.68 | 8.3   | -1.54 | 0.01022  |
| 1568 | B0250.5   | 8.34 | 8.97  | -1.54 | 0.010561 |
| 1569 | ric-19    | 4.96 | 5.58  | -1.54 | 0.013875 |
| 1570 | ZK930.2   | 7.23 | 7.86  | -1.54 | 0.014753 |
| 1571 | tag-267   | 7.18 | 7.8   | -1.54 | 0.015131 |

|      |           |       |       |       |          |
|------|-----------|-------|-------|-------|----------|
| 1572 | Y53F4B.51 | 4.32  | 4.94  | -1.54 | 0.01526  |
| 1573 | rpl-22    | 10.28 | 10.9  | -1.54 | 0.015587 |
| 1574 | ndx-9     | 7.51  | 8.13  | -1.54 | 0.016614 |
| 1575 | Y4C6B.2   | 3.13  | 3.75  | -1.54 | 0.017248 |
| 1576 | B0304.2   | 8.27  | 8.9   | -1.54 | 0.017515 |
| 1577 | R53.4     | 10.37 | 10.99 | -1.54 | 0.01823  |
| 1578 | T13F2.2   | 8.46  | 9.08  | -1.54 | 0.018898 |
| 1579 | lid-1     | 6.61  | 7.23  | -1.54 | 0.020041 |
| 1580 | psf-1     | 7.28  | 7.89  | -1.54 | 0.021352 |
| 1581 | fbxa-27   | 2.38  | 3     | -1.54 | 0.022891 |
| 1582 | F07F6.7   | 3.37  | 3.99  | -1.54 | 0.023072 |
| 1583 | F54D5.11  | 6.81  | 7.43  | -1.54 | 0.02485  |
| 1584 | C10C6.7   | 3.14  | 3.76  | -1.54 | 0.02489  |
| 1585 | srp-7     | 7.58  | 8.21  | -1.54 | 0.024974 |
| 1586 | F56C4.4   | 3.37  | 3.99  | -1.54 | 0.025053 |
| 1587 | tag-281   | 6.21  | 6.84  | -1.54 | 0.028667 |
| 1588 | pes-23    | 5.78  | 6.4   | -1.54 | 0.028966 |
| 1589 | seld-1    | 5.24  | 5.86  | -1.54 | 0.031106 |
| 1590 | C16C8.4   | 6.22  | 6.85  | -1.54 | 0.036075 |
| 1591 | rnp-2     | 7.58  | 8.2   | -1.54 | 0.0369   |
| 1592 | gly-6     | 7.34  | 7.97  | -1.54 | 0.037527 |
| 1593 | F22D3.6   | 3.6   | 4.22  | -1.54 | 0.038329 |
| 1594 | ugt-43    | 1.84  | 2.46  | -1.54 | 0.038343 |
| 1595 | cept-1    | 6.35  | 6.98  | -1.54 | 0.046172 |
| 1596 | Y39H10B.2 | 4.67  | 5.29  | -1.53 | 0.000613 |
| 1597 | pstk-1    | 4.94  | 5.55  | -1.53 | 0.001059 |
| 1598 | nlp-20    | 7.59  | 8.21  | -1.53 | 0.001518 |
| 1599 | ZK1058.5  | 6.33  | 6.94  | -1.53 | 0.001535 |
| 1600 | mrpl-14   | 8     | 8.61  | -1.53 | 0.001792 |
| 1601 | C35D10.6  | 8.59  | 9.2   | -1.53 | 0.002212 |
| 1602 | Y41E3.6   | 2.27  | 2.88  | -1.53 | 0.004172 |
| 1603 | Y53G8B.1  | 4.13  | 4.74  | -1.53 | 0.004649 |
| 1604 | K11D12.8  | 3.55  | 4.16  | -1.53 | 0.006281 |
| 1605 | pbo-1     | 7.18  | 7.79  | -1.53 | 0.006652 |
| 1606 | cyp-32B1  | 5.85  | 6.46  | -1.53 | 0.007309 |

|      |           |       |       |       |          |
|------|-----------|-------|-------|-------|----------|
| 1607 | B0361.3   | 6.94  | 7.55  | -1.53 | 0.007364 |
| 1608 | elpc-3    | 6.59  | 7.2   | -1.53 | 0.007587 |
| 1609 | F48G7.2   | 3.97  | 4.58  | -1.53 | 0.008057 |
| 1610 | tomm-20   | 7.75  | 8.36  | -1.53 | 0.00864  |
| 1611 | ttm-2     | 5.42  | 6.03  | -1.53 | 0.009757 |
| 1612 | taf-11.2  | 5.05  | 5.66  | -1.53 | 0.009974 |
| 1613 | flp-27    | 7.72  | 8.33  | -1.53 | 0.011144 |
| 1614 | K07C11.4  | 7.51  | 8.12  | -1.53 | 0.011331 |
| 1615 | cogc-6    | 6.48  | 7.1   | -1.53 | 0.01361  |
| 1616 | K08E4.6   | 7.44  | 8.05  | -1.53 | 0.014258 |
| 1617 | rpl-38    | 10.72 | 11.34 | -1.53 | 0.014759 |
| 1618 | Y73E7A.6  | 8.8   | 9.41  | -1.53 | 0.015434 |
| 1619 | T27A8.7   | 1.44  | 2.06  | -1.53 | 0.016527 |
| 1620 | hmg-5     | 7.76  | 8.37  | -1.53 | 0.017019 |
| 1621 | R02F2.9   | 7.27  | 7.89  | -1.53 | 0.018468 |
| 1622 | W02B12.1  | 5.8   | 6.41  | -1.53 | 0.018617 |
| 1623 | eif-3.H   | 8.04  | 8.65  | -1.53 | 0.01957  |
| 1624 | twk-18    | 7.24  | 7.85  | -1.53 | 0.019603 |
| 1625 | R119.3    | 7.27  | 7.88  | -1.53 | 0.022915 |
| 1626 | Y71H2AM.5 | 8.82  | 9.43  | -1.53 | 0.0242   |
| 1627 | glrx-22   | 6.57  | 7.19  | -1.53 | 0.027881 |
| 1628 | Y53F4B.14 | 5.65  | 6.26  | -1.53 | 0.032034 |
| 1629 | R144.13   | 7.87  | 8.49  | -1.53 | 0.032087 |
| 1630 | Y87G2A.13 | 7.57  | 8.18  | -1.53 | 0.033729 |
| 1631 | Y71F9B.9  | 4.78  | 5.39  | -1.53 | 0.036321 |
| 1632 | F46B6.15  | 2.47  | 3.08  | -1.53 | 0.036884 |
| 1633 | F10E9.4   | 6.55  | 7.16  | -1.53 | 0.037963 |
| 1634 | C50D2.5   | 3.83  | 4.45  | -1.53 | 0.038282 |
| 1635 | mrpl-4    | 6.48  | 7.09  | -1.53 | 0.049426 |
| 1636 | F38B2.4   | 5.66  | 6.27  | -1.52 | 0.000522 |
| 1637 | F21D5.5   | 6.47  | 7.07  | -1.52 | 0.00079  |
| 1638 | K09E9.1   | 5.49  | 6.1   | -1.52 | 0.00146  |
| 1639 | Y17G9A.2  | 1.62  | 2.22  | -1.52 | 0.002471 |
| 1640 | C01B10.47 | 2.23  | 2.83  | -1.52 | 0.002959 |
| 1641 | C24F3.2   | 5.96  | 6.57  | -1.52 | 0.003045 |

|             |           |      |      |       |          |
|-------------|-----------|------|------|-------|----------|
| <b>1642</b> | Y105E8B.6 | 5.41 | 6.02 | -1.52 | 0.003114 |
| <b>1643</b> | sek-6     | 3.15 | 3.75 | -1.52 | 0.00422  |
| <b>1644</b> | T26A5.6   | 6.83 | 7.44 | -1.52 | 0.005391 |
| <b>1645</b> | K11G9.5   | 3.59 | 4.19 | -1.52 | 0.005457 |
| <b>1646</b> | B0281.3   | 5.14 | 5.75 | -1.52 | 0.005938 |
| <b>1647</b> | C25H3.7   | 7.48 | 8.08 | -1.52 | 0.006057 |
| <b>1648</b> | T22B7.8   | 4.55 | 5.16 | -1.52 | 0.00607  |
| <b>1649</b> | Y18D10A.9 | 6.46 | 7.07 | -1.52 | 0.007552 |
| <b>1650</b> | dhhc-6    | 7.75 | 8.35 | -1.52 | 0.008081 |
| <b>1651</b> | F08H9.3   | 2.43 | 3.04 | -1.52 | 0.009847 |
| <b>1652</b> | cdk-7     | 7    | 7.6  | -1.52 | 0.010284 |
| <b>1653</b> | hlys-1    | 6.69 | 7.3  | -1.52 | 0.011455 |
| <b>1654</b> | C49C8.2   | 4.3  | 4.91 | -1.52 | 0.019043 |
| <b>1655</b> | mrpl-24   | 5.74 | 6.34 | -1.52 | 0.019526 |
| <b>1656</b> | C25G4.2   | 6.42 | 7.02 | -1.52 | 0.019549 |
| <b>1657</b> | C09B8.8   | 2.39 | 2.99 | -1.52 | 0.020713 |
| <b>1658</b> | R144.3    | 6.53 | 7.14 | -1.52 | 0.021027 |
| <b>1659</b> | nhr-176   | 4.52 | 5.13 | -1.52 | 0.021047 |
| <b>1660</b> | mrps-28   | 8.37 | 8.97 | -1.52 | 0.021739 |
| <b>1661</b> | acl-11    | 5.72 | 6.32 | -1.52 | 0.022986 |
| <b>1662</b> | gro-1     | 6.5  | 7.1  | -1.52 | 0.023475 |
| <b>1663</b> | cutl-3    | 3.53 | 4.14 | -1.52 | 0.026195 |
| <b>1664</b> | C44E12.1  | 5.54 | 6.14 | -1.52 | 0.026843 |
| <b>1665</b> | C06B3.6   | 8.73 | 9.33 | -1.52 | 0.026939 |
| <b>1666</b> | exos-4.2  | 6.49 | 7.1  | -1.52 | 0.02743  |
| <b>1667</b> | R07G3.8   | 7.25 | 7.86 | -1.52 | 0.029014 |
| <b>1668</b> | ZK1055.2  | 1.94 | 2.55 | -1.52 | 0.036224 |
| <b>1669</b> | acs-14    | 6.23 | 6.83 | -1.52 | 0.037005 |
| <b>1670</b> | R53.5     | 8.31 | 8.92 | -1.52 | 0.03779  |
| <b>1671</b> | asah-1    | 9.11 | 9.72 | -1.52 | 0.046822 |
| <b>1672</b> | arx-4     | 7.79 | 8.39 | -1.52 | 0.0487   |
| <b>1673</b> | Y46G5A.15 | 6.37 | 6.96 | -1.51 | 0.000185 |
| <b>1674</b> | use-1     | 6.44 | 7.04 | -1.51 | 0.000493 |
| <b>1675</b> | tre-3     | 7.19 | 7.78 | -1.51 | 0.002033 |
| <b>1676</b> | fmo-2     | 4.54 | 5.14 | -1.51 | 0.002839 |

|      |           |      |       |       |          |
|------|-----------|------|-------|-------|----------|
| 1677 | oig-4     | 5.41 | 6     | -1.51 | 0.003215 |
| 1678 | pdha-1    | 9.12 | 9.72  | -1.51 | 0.003388 |
| 1679 | mecr-1    | 6.77 | 7.37  | -1.51 | 0.003513 |
| 1680 | C14B1.2   | 7.88 | 8.47  | -1.51 | 0.003857 |
| 1681 | F20A1.4   | 2.21 | 2.8   | -1.51 | 0.005265 |
| 1682 | F53F10.1  | 6.74 | 7.34  | -1.51 | 0.005586 |
| 1683 | C49A9.4   | 5    | 5.6   | -1.51 | 0.005864 |
| 1684 | C18F3.6   | 0.74 | 1.34  | -1.51 | 0.007274 |
| 1685 | glt-3     | 5.75 | 6.34  | -1.51 | 0.008574 |
| 1686 | Y55F3BL.4 | 7.37 | 7.96  | -1.51 | 0.010868 |
| 1687 | K06H7.7   | 5.31 | 5.91  | -1.51 | 0.012663 |
| 1688 | nhr-54    | 3.6  | 4.2   | -1.51 | 0.014065 |
| 1689 | K12H4.3   | 7.81 | 8.4   | -1.51 | 0.016297 |
| 1690 | hars-1    | 7.71 | 8.3   | -1.51 | 0.019267 |
| 1691 | F44B9.5   | 6.61 | 7.2   | -1.51 | 0.019379 |
| 1692 | F42A8.3   | 7.14 | 7.74  | -1.51 | 0.02118  |
| 1693 | mtss-1    | 9.47 | 10.06 | -1.51 | 0.022049 |
| 1694 | Y53C12A.3 | 7.18 | 7.78  | -1.51 | 0.022467 |
| 1695 | C06H2.7   | 5.81 | 6.41  | -1.51 | 0.024811 |
| 1696 | hex-5     | 4.47 | 5.07  | -1.51 | 0.026403 |
| 1697 | T02D1.8   | 5.76 | 6.36  | -1.51 | 0.027919 |
| 1698 | ttr-39    | 3.14 | 3.73  | -1.51 | 0.031226 |
| 1699 | mrps-18B  | 8.08 | 8.68  | -1.51 | 0.032525 |
| 1700 | B0035.18  | 4.57 | 5.17  | -1.51 | 0.032764 |
| 1701 | C48E7.1   | 9.23 | 9.83  | -1.51 | 0.033376 |
| 1702 | K03F8.3   | 4.78 | 5.37  | -1.51 | 0.033517 |
| 1703 | C25E10.12 | 5.57 | 6.16  | -1.51 | 0.037903 |
| 1704 | M01H9.4   | 5.85 | 6.44  | -1.51 | 0.040537 |
| 1705 | F52B5.7   | 3.87 | 4.47  | -1.51 | 0.045473 |
| 1706 | C13C4.11  | 4.25 | 4.84  | -1.51 | 0.045507 |
| 1707 | ttr-36    | 6.82 | 7.42  | -1.51 | 0.0472   |

---

**Table S4. The up- and down-regulated differentially expressed miRNAs in nematodes.**

| <b>Number</b> | <b>miRNA</b>    | <b>SiNPs-weight<br/>Avg signal<br/>(log2)</b> | <b>Control-weight<br/>Avg signal<br/>(log2)</b> | <b>Fold<br/>Change</b> | <b>Regulation</b> | <b>ANOVA<br/>p-value</b> |
|---------------|-----------------|-----------------------------------------------|-------------------------------------------------|------------------------|-------------------|--------------------------|
| <b>1</b>      | cel-miR-58-5p   | 1.81                                          | 5.01                                            | -9.19                  | down              | 0.005488                 |
| <b>2</b>      | cel-miR-4813-3p | 1.41                                          | 3.11                                            | -3.26                  | down              | 0.041562                 |
| <b>3</b>      | cel-miR-2210-3p | 1.21                                          | 2.78                                            | -2.97                  | down              | 0.009771                 |
| <b>4</b>      | cel-miR-1829c   | 1.61                                          | 3.1                                             | -2.81                  | down              | 0.04276                  |
| <b>5</b>      | cel-miR-784-5p  | 0.61                                          | 1.97                                            | -2.58                  | down              | 0.002443                 |
| <b>6</b>      | cel-miR-788-3p  | 3.48                                          | 4.7                                             | -2.34                  | down              | 0.038238                 |
| <b>7</b>      | cel-miR-4929    | 1.3                                           | 2.51                                            | -2.31                  | down              | 0.03776                  |
| <b>8</b>      | cel-miR-75-5p   | 0.39                                          | 1.57                                            | -2.27                  | down              | 0.038335                 |
| <b>9</b>      | cel-miR-259-3p  | 1.12                                          | 2.28                                            | -2.23                  | down              | 0.022146                 |
| <b>10</b>     | cel-miR-1832a   | 1.07                                          | 2.18                                            | -2.17                  | down              | 0.007643                 |
| <b>11</b>     | cel-miR-793     | 1.26                                          | 2.34                                            | -2.11                  | down              | 0.025241                 |
| <b>12</b>     | cel-miR-47-3p   | 9.06                                          | 10.1                                            | -2.05                  | down              | 0.014891                 |
| <b>13</b>     | cel-miR-2217-3p | 0.85                                          | 1.87                                            | -2.03                  | down              | 0.020489                 |
| <b>14</b>     | cel-miR-238-5p  | 0.78                                          | 1.8                                             | -2.02                  | down              | 0.037867                 |
| <b>15</b>     | cel-miR-358-5p  | 3.31                                          | 4.22                                            | -1.87                  | down              | 0.032854                 |
| <b>16</b>     | cel-let-7-5p    | 10.74                                         | 11.6                                            | -1.81                  | down              | 0.013018                 |
| <b>17</b>     | cel-miR-271     | 1.05                                          | 1.89                                            | -1.79                  | down              | 0.032466                 |
| <b>18</b>     | cel-miR-241-5p  | 11.09                                         | 11.88                                           | -1.72                  | down              | 0.007084                 |
| <b>19</b>     | cel-miR-2212-5p | 1.12                                          | 1.88                                            | -1.7                   | down              | 0.038196                 |
| <b>20</b>     | cel-miR-63-3p   | 10.26                                         | 10.95                                           | -1.61                  | down              | 0.009082                 |
| <b>21</b>     | cel-miR-124-5p  | 2.92                                          | 3.55                                            | -1.55                  | down              | 0.041479                 |
| <b>22</b>     | cel-miR-234-3p  | 0.82                                          | 1.45                                            | -1.54                  | down              | 0.025019                 |
| <b>23</b>     | cel-miR-789     | 8.34                                          | 6.89                                            | 2.74                   | up                | 0.019043                 |
